# Supplementary material for: Dynamic Network-Based Relevance Score Reveals Essential Proteins and Functional Modules in Directed Differentiation
Source: Stem Cells Int. 2015 Apr 21;2015:792843. doi: 10.1155/2015/792843 (PMC4419265; doi:10.1155/2015/792843)
Supplement: Supplementary file 1 — The supplementary materials contain the whole interaction difference networks from LSB stage to LSB/S/F8 stage and from LSB/S/F8 stage to LSB/S/F8/CHIR stage (docx file) and the tables used in Cytoscape to visualize the interaction difference networks (xlsx files). [file 792843.f1.zip]

Archive with 6 entries (5 files):
- New folder/
- New folder/difference_LSBF8-LSB_edge_cytoscape.xlsx
- New folder/difference_LSBF8-LSB_node_cytoscape.xlsx
- New folder/difference_LSBF8CHIR-LSBF8_edge_cytoscape.xlsx
- New folder/difference_LSBF8CHIR-LSBF8_node_cytoscape.xlsx
- New folder/mat.792843.v1 (2).docx
