# Supplementary material for: Dynamic Network-Based Relevance Score Reveals Essential Proteins and Functional Modules in Directed Differentiation
Source: Stem Cells Int. 2015 Apr 21;2015:792843. doi: 10.1155/2015/792843 (PMC4419265; doi:10.1155/2015/792843)
Supplement: Supplementary file 1 — The supplementary materials contain the whole interaction difference networks from LSB stage to LSB/S/F8 stage and from LSB/S/F8 stage to LSB/S/F8/CHIR stage (docx file) and the tables used in Cytoscape to visualize the interaction difference networks (xlsx files). [file 792843.f1.zip › New folder/difference_LSBF8-LSB_edge_cytoscape.xlsx]

## Sheet: 工作表2
PXN	AASS	dis_mo	-0.0667885
AOX1	ABCA1	dis_mo	-0.0639613
CSNK2A2	ABCA1	dis_po	0.00977848
SDHB	ABCA1	dis_po	0.0324096
TGM2	ABCA1	dis_po	0.00905683
PRKX	ABCA2	dis_po	0.230038
UBC	ABCA2	dis_mo	-0.0900116
UBC	ABCB6	dis_po	0.154187
KARS	ABCE1	dis_po	0.0337747
SSBP1	ABCE1	dis_po	0.00692747
CSDA	ABCF1	dis_po	0.0906207
GRK5	ABCF1	dis_mo	-0.00778767
KIT	ABCF1	dis_mo	-0.00493906
MAP2	ABCF1	dis_mo	-0.240659
UBC	ABCF1	dis_mo	-0.0343889
UBC	ABHD5	dis_po	0.441256
ENOPH1	ACAA1	dis_po	0.152142
HMGCS1	ACAA1	dis_mo	-0.0255547
SQLE	ACAA1	dis_mo	-0.0244831
VDAC3	ACAA1	dis_po	0.0182437
EIF3I	ACAT1	dis_po	0.00426273
FOXM1	ACAT1	dis_mo	-0.00426798
HMGCS1	ACAT1	dis_po	0.00251664
HSD17B4	ACAT1	dis_mo	-0.0652795
KARS	ACAT1	dis_mo	-0.00537004
ODC1	ACAT1	dis_po	0.00455033
SNRNP200	ACAT1	dis_mo	-0.00429432
SQLE	ACAT1	dis_po	0.0190601
TTF2	ACAT1	dis_po	0.126526
ATG5	ACAT2	dis_mo	-0.042748
HMGB3	ACAT2	dis_po	0.2536
JUN	ACAT2	dis_mo	-0.171463
TTC39C	ACAT2	dis_po	0.0423114
UBC	ACAT2	dis_po	0.089829
ATG5	ACLY	dis_mo	-0.0132661
C12orf44	ACLY	dis_po	0.0112057
DTNA	ACLY	dis_po	0.532561
FOXO3	ACLY	dis_po	0.00752291
TFE3	ACLY	dis_po	0.0482664
C12orf57	ACO1	dis_mo	-0.237471
PXN	ACO1	dis_po	0.0531097
UBC	ACOT9	dis_mo	-0.0179156
DHCR7	ACP6	dis_mo	-0.0975581
RSU1	ACP6	dis_mo	-0.0177341
APOE	ACSL1	dis_mo	-0.00942574
CALR	ACSL1	dis_po	0.00242394
CYB5A	ACSL1	dis_mo	-0.239414
FTL	ACSL1	dis_mo	-0.0373498
PPP1R3B	ACSL1	dis_po	0.0234791
UBC	ACSL1	dis_po	0.0139211
ERBB2	ACSL3	dis_po	0.911735
NDRG1	ACSL3	dis_mo	-0.294339
UBC	ACSL3	dis_po	0.12303
VCAM1	ACSM3	dis_po	0.0753833
CDYL	ACSS2	dis_po	0.471148
DDX49	ACSS2	dis_mo	-0.120249
HSPD1	ACSS2	dis_mo	-0.0841899
MDN1	ACSS2	dis_po	0.344508
RHOC	ACSS2	dis_po	0.00524118
TKT	ACSS2	dis_mo	-0.161424
UBC	ACSS2	dis_mo	-0.0567726
ANXA4	ACTA1	dis_po	0.498553
ATG5	ACTA1	dis_mo	-0.0197978
COTL1	ACTA1	dis_mo	-0.0815945
CTTN	ACTA1	dis_po	0.0191633
EPS8L1	ACTA1	dis_mo	-0.192266
ITGA2	ACTA1	dis_mo	-0.0161763
JUB	ACTA1	dis_po	0.29364
PARVA	ACTA1	dis_mo	-0.00684229
PFN1	ACTA1	dis_po	0.0244746
PLS1	ACTA1	dis_mo	-0.0854309
SORBS1	ACTA1	dis_mo	-0.0211565
VCL	ACTA1	dis_mo	-0.000722296
ACTC1	ACTA2	dis_po	0.00622433
FSCN1	ACTA2	dis_po	0.0389063
MYL6	ACTA2	dis_mo	-0.0166337
MYL9	ACTA2	dis_mo	-0.0060237
RABGAP1	ACTA2	dis_mo	-0.00379646
RPS23	ACTA2	dis_po	0.000530744
TAGLN	ACTA2	dis_po	0.0756597
TAGLN3	ACTA2	dis_mo	-0.152294
ACTA2	ACTC1	dis_po	0.00622433
BRP44L	ACTC1	dis_po	0.0265128
CAPN1	ACTC1	dis_mo	-0.095157
TPM1	ACTC1	dis_mo	-0.0441817
VCL	ACTC1	dis_po	0.0726265
DSTN	ACTG2	dis_mo	-0.0450004
IQGAP2	ACTG2	dis_mo	-0.00154772
JUN	ACTG2	dis_po	0.0481524
MYL6	ACTG2	dis_mo	-0.0177209
ACTN4	ACTN3	dis_mo	-0.229865
UBC	ACTN3	dis_mo	-0.0374784
ACTN3	ACTN4	dis_mo	-0.229865
CSRP1	ACTN4	dis_mo	-0.0497823
DTNA	ACTN4	dis_mo	-0.135619
FAM124B	ACTN4	dis_mo	-0.029051
GNG8	ACTN4	dis_mo	-0.0230297
GRIN2D	ACTN4	dis_po	0.015644
JUN	ACTN4	dis_po	0.00414821
LMCD1	ACTN4	dis_po	0.0739316
PDLIM5	ACTN4	dis_po	0.016468
PYGL	ACTN4	dis_mo	-0.0105253
SERPINE1	ACTN4	dis_po	0.0123517
DIABLO	ACVR1	dis_po	0.00943168
ENG	ACVR1	dis_po	0.00906637
IGSF1	ACVR1	dis_mo	-0.0683817
RAB25	ACVR1	dis_mo	-0.0913733
RASD2	ACVR1	dis_mo	-0.0463556
SQSTM1	ACVR1	dis_mo	-0.0903803
TSC22D1	ACVR1	dis_mo	-0.00104253
UBC	ACVR1	dis_mo	-0.0406545
BAMBI	ACVR1B	dis_mo	-0.0197164
DUSP14	ACVR1B	dis_po	0.0294893
ELAVL1	ACVR1B	dis_mo	-0.0107991
LEF1	ACVR1B	dis_mo	-0.0163768
LEFTY2	ACVR1B	dis_po	0.0856575
NUAK1	ACVR1B	dis_po	0.125655
RXRA	ACVR1B	dis_mo	-0.0286639
SOCS7	ACVR1B	dis_mo	-0.0495372
UBC	ACVR1B	dis_mo	-0.00163392
VWF	ACVR1B	dis_mo	-0.00518959
ENG	ACVR2A	dis_po	0.052863
HSP90AA1	ACVR2A	dis_po	0.0683996
IGSF1	ACVR2A	dis_mo	-0.0772628
SMAD7	ACVR2A	dis_mo	-0.0897507
TDGF1	ACVR2A	dis_mo	-0.139491
UBC	ACVR2A	dis_po	0.0700564
UBC	ACY1	dis_mo	-0.0258679
CBS	ADA	dis_mo	-0.108383
PIAS2	ADA	dis_po	0.0901174
PSAT1	ADA	dis_mo	-0.00610016
PSMD14	ADA	dis_po	0.0207327
SH3YL1	ADA	dis_mo	-0.0116223
SLC25A21	ADA	dis_po	0.028926
UBC	ADA	dis_po	0.0535051
PDIA4	ADAMTS1	dis_po	0.00445927
THBS1	ADAMTS1	dis_mo	-0.0291745
TIMP2	ADAMTS1	dis_po	0.000472352
TIMP3	ADAMTS1	dis_mo	-0.0746626
TIMP3	ADAMTS8	dis_mo	-0.0513147
LIMS1	ADAMTS9	dis_po	0.00302414
ELAVL1	ADAR	dis_po	0.0376493
FOXO3	ADAR	dis_mo	-0.0327311
SNRPN	ADAR	dis_po	0.0334154
TGM2	ADAR	dis_po	0.0174934
GDF15	ADM	dis_mo	-0.069418
VIPR1	ADM	dis_mo	-0.0922377
CXCL6	ADORA2B	dis_mo	-0.0157285
NTN1	ADORA2B	dis_po	0.0129146
C5	ADRA2A	dis_po	0.0672517
GABBR2	ADRA2A	dis_po	0.0116127
GAL	ADRA2A	dis_po	0.0918056
GRM3	ADRA2A	dis_po	0.258811
GRM4	ADRA2A	dis_mo	-0.166327
LPAR1	ADRA2A	dis_po	0.0188565
PDYN	ADRA2A	dis_mo	-0.0289021
RGS16	ADRA2A	dis_po	0.0268884
RGS17	ADRA2A	dis_mo	-0.228265
BUB3	ADRM1	dis_mo	-0.00570825
CSDA	ADRM1	dis_po	0.065726
NOS2	ADRM1	dis_mo	-0.00656279
PSMA6	ADRM1	dis_po	0.0123122
PSMC4	ADRM1	dis_po	0.0360065
PSMD1	ADRM1	dis_mo	-0.0228665
PSMD4	ADRM1	dis_po	0.0290323
ADSSL1	ADSL	dis_mo	-0.0482713
FOXO3	ADSL	dis_po	0.00646861
PRKAG2	ADSL	dis_mo	-0.0487518
GSR	ADSS	dis_mo	-0.0196574
PRKAG2	ADSS	dis_mo	-0.0698663
ADSL	ADSSL1	dis_mo	-0.0482713
APRT	ADSSL1	dis_mo	-0.125651
PFAS	ADSSL1	dis_po	0.166761
PRPF40A	ADSSL1	dis_mo	-0.0126642
PSAT1	ADSSL1	dis_po	0.00978038
PSMD4	ADSSL1	dis_po	0.0194798
TUFM	ADSSL1	dis_mo	-0.0420416
APP	AEBP2	dis_po	0.566097
ELAVL1	AEBP2	dis_po	0.55083
JARID2	AEBP2	dis_mo	-0.352305
UBC	AEBP2	dis_po	0.127842
PTRH2	AES	dis_mo	-0.00437365
SH3GL3	AES	dis_mo	-0.0180531
TLE3	AES	dis_po	0.0358735
MYO1E	AFG3L2	dis_mo	-0.00117031
NUDT5	AFG3L2	dis_mo	-0.32321
PRELID1	AFG3L2	dis_po	0.0529491
PSMD8	AFG3L2	dis_po	0.0262721
RAC2	AFG3L2	dis_mo	-0.0121988
RNF167	AFG3L2	dis_mo	-0.0174251
SOD2	AFG3L2	dis_mo	-0.00134385
UBC	AFG3L2	dis_mo	-0.0148332
EHD4	AFP	dis_mo	-0.220306
SLC2A2	AFP	dis_mo	-0.0270906
UBC	AGPAT5	dis_po	0.242958
C12orf44	AGPS	dis_mo	-0.10265
ATG5	AHCY	dis_po	0.00314395
BCKDK	AHCY	dis_po	0.0189566
EEF1A2	AHCY	dis_mo	-0.0107009
KIAA0020	AHCY	dis_mo	-0.0193783
PGM1	AHCY	dis_mo	-0.00373549
RABGAP1	AHCY	dis_po	0.0015434
SERPINB6	AHCY	dis_po	0.130182
EZR	AHNAK	dis_mo	-0.0224408
GRB10	AHNAK	dis_mo	-0.0911396
LCK	AHNAK	dis_po	0.109385
S100A10	AHNAK	dis_mo	-0.0270266
UBC	AHNAK	dis_mo	-0.00606617
EIF4A1	AHSA1	dis_mo	-0.0165872
PHLDA3	AHSA1	dis_po	0.00447908
PSMD4	AHSA1	dis_po	0.00527433
SQLE	AHSA1	dis_po	0.00282951
SRR	AHSA1	dis_po	0.130812
ATG5	AK2	dis_mo	-0.00347021
CBS	AK2	dis_mo	-0.00713256
PYGL	AK2	dis_po	0.00673844
RPE	AK2	dis_mo	-0.106035
RPL8	AK2	dis_po	0.00111883
SRM	AK2	dis_mo	-0.00185449
UBC	AK2	dis_po	0.0358085
USP7	AKAP1	dis_mo	-0.0319964
ELAVL1	AKIRIN2	dis_mo	-0.0812641
HSP90AA1	AKR1A1	dis_mo	-0.0192236
PFAS	AKR1A1	dis_po	0.0099317
PYGL	AKR1A1	dis_mo	-0.00737401
TERF1	AKR1A1	dis_mo	-0.0276139
UBC	AKR1A1	dis_po	0.00851773
PRMT2	AKR1B1	dis_mo	-0.0100009
TFE3	AKR1B1	dis_mo	-0.0379213
UBC	AKR1B1	dis_po	0.0784391
UBC	ALCAM	dis_mo	-0.180442
ALDH2	ALDH1A1	dis_mo	-0.0678431
NOS2	ALDH1A1	dis_po	0.205646
UBC	ALDH1A3	dis_po	0.321567
ATG5	ALDH1B1	dis_po	0.0729604
GMPPB	ALDH1B1	dis_mo	-0.00198893
PDCD10	ALDH1B1	dis_mo	-0.0323694
TUBB3	ALDH1B1	dis_mo	-0.0503421
UBR7	ALDH1B1	dis_mo	-1.75514
ALDH1A1	ALDH2	dis_mo	-0.0678431
APP	ALDH2	dis_po	0.0331605
IGSF21	ALDH2	dis_mo	-0.0131252
RPL13A	ALDH2	dis_mo	-0.0295126
SOD2	ALDH5A1	dis_mo	-0.0403175
SSBP1	ALDH5A1	dis_po	0.0836236
TOMM40	ALDH5A1	dis_po	0.0415528
DDIT3	ALDOC	dis_mo	-0.0190975
PDIA4	ALG3	dis_po	0.0213675
RPN1	ALG3	dis_po	0.0426181
UBC	ALG3	dis_mo	-0.0958695
UBC	ALPK2	dis_mo	-0.372897
BCAR3	AMD1	dis_po	0.00889156
EIF5A	AMD1	dis_po	0.0759465
FBP1	AMD1	dis_mo	-0.0181476
IDH1	AMD1	dis_mo	-0.0186641
ODC1	AMD1	dis_mo	-0.121083
ATP2A2	AMFR	dis_po	0.0993911
CANX	AMFR	dis_mo	-0.019948
CSE1L	AMFR	dis_mo	-0.0172652
HERPUD1	AMFR	dis_po	0.0300722
HSP90B1	AMFR	dis_po	0.0130693
INSIG1	AMFR	dis_po	0.197741
RPN1	AMFR	dis_mo	-0.0508094
SELS	AMFR	dis_po	0.173537
UBE2G1	AMFR	dis_po	0.0357755
DUSP1	AMPH	dis_mo	-0.0090724
FBP1	AMPH	dis_po	0.0154967
REPS2	AMPH	dis_po	0.0244484
RPS6KA2	AMPH	dis_mo	-0.00616028
SH3GL2	AMPH	dis_mo	-0.0752623
SH3GL3	AMPH	dis_mo	-0.013452
TERF1	AMPH	dis_po	0.0137491
VTN	AMPH	dis_po	0.00510672
FST	ANG	dis_mo	-0.0204626
TDGF1	ANG	dis_mo	-0.0657148
ARHGDIB	ANKRD1	dis_mo	-0.0326654
DNAJB6	ANKRD1	dis_po	0.00459708
DYSF	ANKRD1	dis_mo	-0.0439435
LRPPRC	ANKRD1	dis_po	0.112
UBC	ANKRD1	dis_mo	-0.0615945
RARA	ANKRD11	dis_po	0.0812172
UBC	ANKRD11	dis_po	0.250324
ELAVL1	ANKRD46	dis_po	0.0719375
UBC	ANKRD46	dis_mo	-0.0540642
LMNA	ANLN	dis_mo	-0.14686
UBC	ANLN	dis_po	0.0114992
BCL2L1	ANTXR1	dis_po	0.42692
ELAVL1	ANTXR1	dis_mo	-0.262181
UBC	ANTXR1	dis_mo	-0.453923
ANXA5	ANXA1	dis_mo	-0.0236886
CSAD	ANXA1	dis_po	0.0272087
CXCL12	ANXA1	dis_po	0.0485276
DRD4	ANXA1	dis_po	0.0949607
GHSR	ANXA1	dis_po	0.0210401
LPAR1	ANXA1	dis_po	0.0182759
PDYN	ANXA1	dis_mo	-0.0397342
PROK2	ANXA1	dis_po	0.0634246
UBC	ANXA1	dis_mo	-0.00769108
ATG5	ANXA2	dis_mo	-0.0309433
CCL2	ANXA2	dis_po	0.00291193
DYSF	ANXA2	dis_mo	-0.0163391
ERBB3	ANXA2	dis_mo	-0.00663124
ISG15	ANXA2	dis_mo	-0.00376283
MID1	ANXA2	dis_po	0.0167183
PPP2R2B	ANXA2	dis_mo	-0.00453688
RAB24	ANXA2	dis_po	0.00122369
S100A11	ANXA2	dis_mo	-0.0198577
UBC	ANXA2	dis_mo	-0.113782
ANXA4	ANXA3	dis_po	0.027301
CBLC	ANXA3	dis_po	0.00917225
EFNB1	ANXA3	dis_mo	-0.0157682
ISG15	ANXA3	dis_po	0.0500237
UBC	ANXA3	dis_po	0.0173177
ACTA1	ANXA4	dis_po	0.498553
ANXA3	ANXA4	dis_po	0.027301
UBC	ANXA4	dis_mo	-0.27842
ANXA1	ANXA5	dis_mo	-0.0236886
ATG5	ANXA5	dis_mo	-0.00401596
DDIT3	ANXA5	dis_po	0.0402841
FDFT1	ANXA5	dis_mo	-0.00651254
UBC	ANXA5	dis_mo	-0.0333008
ABCA1	AOX1	dis_mo	-0.0639613
GK	AOX1	dis_mo	-0.0161301
B2M	AP1M2	dis_mo	-0.00154904
ERBB3	AP1M2	dis_mo	-0.0216879
HSPA8	AP1M2	dis_mo	-0.0613955
UBC	AP1M2	dis_po	0.0369879
CDH3	AP2M1	dis_po	0.105985
CRK	AP2M1	dis_po	0.0085264
DAB2	AP2M1	dis_mo	-0.00768064
LAMP2	AP2M1	dis_mo	-0.0061944
NCOR2	AP2M1	dis_mo	-0.012382
MCM4	APEX1	dis_mo	-0.0231631
MPG	APEX1	dis_po	0.00446068
SIRT1	APEX1	dis_po	0.0108418
TXN	APEX1	dis_po	0.0054827
NOTCH3	APH1B	dis_po	0.0174207
UBC	APH1B	dis_mo	-0.0416393
UBC	APIP	dis_po	0.35546
ZBTB25	APIP	dis_po	0.248866
CLIP1	APITD1	dis_po	0.0150208
MLF1IP	APITD1	dis_po	0.0436921
PAFAH1B1	APITD1	dis_mo	-0.0464438
RCC2	APITD1	dis_po	0.0251059
ZWILCH	APITD1	dis_po	0.0101727
CDKN1A	APLP1	dis_mo	-0.016705
FOS	APLP1	dis_mo	-0.0194999
PRNP	APLP1	dis_po	0.00267543
UTP14A	APLP1	dis_po	0.03625
VGF	APLP1	dis_po	0.0161575
UBC	APOBEC3B	dis_po	0.282912
ACSL1	APOE	dis_mo	-0.00942574
GPC4	APOE	dis_mo	-0.08933
NEFM	APOE	dis_mo	-0.0859799
ORM1	APOE	dis_mo	-0.0591962
SCARB1	APOE	dis_mo	-0.0541154
AEBP2	APP	dis_po	0.566097
ALDH2	APP	dis_po	0.0331605
APRT	APP	dis_po	0.00473289
ARL4C	APP	dis_mo	-0.264634
ARL5A	APP	dis_mo	-0.0998601
ATL3	APP	dis_mo	-0.074385
BTF3	APP	dis_mo	-0.14666
C18orf21	APP	dis_po	0.165276
C22orf13	APP	dis_po	0.0912789
C2orf56	APP	dis_mo	-0.0552667
C7orf41	APP	dis_mo	-0.0717605
CAPSL	APP	dis_po	0.144256
CHAC2	APP	dis_mo	-0.0791569
CHAF1B	APP	dis_mo	-0.0125436
CINP	APP	dis_mo	-0.0476864
CIRH1A	APP	dis_po	0.00878611
CNPY2	APP	dis_mo	-0.0120057
COLEC12	APP	dis_mo	-0.194013
DIXDC1	APP	dis_mo	-0.0530984
DNAJB6	APP	dis_po	0.00356794
DNAJC12	APP	dis_mo	-0.109383
DRAP1	APP	dis_po	0.258106
DYRK2	APP	dis_po	0.341695
EIF1AX	APP	dis_po	0.00141962
EIF3M	APP	dis_mo	-0.132975
EIF4E2	APP	dis_mo	-0.11494
EPB41L3	APP	dis_po	0.00122391
ETFB	APP	dis_po	0.0680434
FAM116B	APP	dis_mo	-0.139961
FGF16	APP	dis_mo	-0.291439
FHL2	APP	dis_mo	-0.0329417
GABBR2	APP	dis_po	0.0156407
GLOD4	APP	dis_mo	-0.170312
GNA14	APP	dis_mo	-0.0227495
GRM3	APP	dis_mo	-0.20566
GRM4	APP	dis_mo	-0.0439163
GRPR	APP	dis_po	0.0112849
GSTO1	APP	dis_mo	-0.0934876
GTF2E2	APP	dis_po	0.00934314
H1F0	APP	dis_po	0.0227353
HADHB	APP	dis_mo	-0.00716359
HELLS	APP	dis_po	0.0153236
HERPUD1	APP	dis_mo	-0.0216426
HEYL	APP	dis_po	0.0215369
HIC2	APP	dis_mo	-0.18615
HSPBP1	APP	dis_po	0.0328095
IARS2	APP	dis_mo	-0.0498187
ITGB1BP3	APP	dis_po	0.0893455
LAMA1	APP	dis_po	0.0155132
LINGO1	APP	dis_mo	-0.0618359
LRRC8D	APP	dis_mo	-0.13936
MAPK10	APP	dis_mo	-0.0458097
MAPK13	APP	dis_po	0.00665618
2013-03-03	APP	dis_mo	-0.189864
MARS2	APP	dis_mo	-0.0770495
METTL11A	APP	dis_mo	-0.183096
MRRF	APP	dis_mo	-0.203584
MSI1	APP	dis_mo	-0.0887235
MST4	APP	dis_mo	-0.0175303
NDUFA4	APP	dis_po	0.130388
NFKBIB	APP	dis_po	0.0195264
NLRP2	APP	dis_po	0.0394658
NOL11	APP	dis_mo	-0.0605491
NUAK1	APP	dis_mo	-0.00869252
NUAK2	APP	dis_po	0.0278192
NUP62CL	APP	dis_po	0.0780683
OLFML2A	APP	dis_mo	-0.0872087
P2RY1	APP	dis_mo	-0.000755762
PAK6	APP	dis_po	0.0634308
PDE4D	APP	dis_mo	-0.0799484
PDYN	APP	dis_po	0.0112584
PLA2G4C	APP	dis_mo	-0.128248
PLEKHO2	APP	dis_mo	-0.061842
PLS3	APP	dis_mo	-0.0144921
PRDX5	APP	dis_mo	-0.0820799
PTMS	APP	dis_po	0.0102988
PUSL1	APP	dis_mo	-0.130107
PWP1	APP	dis_po	0.00414107
PYCR2	APP	dis_mo	-0.178569
RASGRP2	APP	dis_po	0.0597516
RIMS4	APP	dis_mo	-0.141515
RSU1	APP	dis_mo	-0.0224746
SIGIRR	APP	dis_po	0.122919
SLC2A2	APP	dis_mo	-0.0690377
SPINT2	APP	dis_mo	-0.212559
SRGAP3	APP	dis_mo	-0.112347
STK17B	APP	dis_mo	-0.0448553
STK40	APP	dis_mo	-0.0818008
SULT1A3	APP	dis_mo	-0.128131
TMEM180	APP	dis_po	0.0425684
UBE2G1	APP	dis_mo	-0.217354
ZCCHC12	APP	dis_mo	-0.0657258
ZDHHC23	APP	dis_mo	-0.112979
ZEB2	APP	dis_po	0.0184384
ZFP36	APP	dis_mo	-0.0136591
C6orf106	APPBP2	dis_mo	-0.0535273
CNTFR	APPBP2	dis_mo	-0.347317
CRABP2	APPBP2	dis_po	0.224422
CTSC	APPBP2	dis_po	0.147951
MFSD3	APPBP2	dis_mo	-0.0300415
NSMCE4A	APPBP2	dis_po	0.164306
PDIA4	APPBP2	dis_mo	-0.062972
RRS1	APPBP2	dis_po	0.0672918
SYT11	APPBP2	dis_mo	-0.0220337
TCEB2	APPBP2	dis_po	0.075147
WNT5B	APPBP2	dis_po	0.0546704
FAM65A	APPL2	dis_mo	-0.124594
RAB22A	APPL2	dis_mo	-0.110386
TPM1	APPL2	dis_po	0.0951399
ADSSL1	APRT	dis_mo	-0.125651
APP	APRT	dis_po	0.00473289
GCH1	APRT	dis_po	0.00306479
PSMC3	APRT	dis_mo	-0.0100142
PYGL	APRT	dis_mo	-0.00594808
UBC	AQR	dis_po	0.027257
ASAP1	ARAP3	dis_mo	-0.0210871
RHOB	ARAP3	dis_po	0.0820986
RHOG	ARAP3	dis_po	0.0198763
DDX27	ARFGEF1	dis_mo	-0.0269316
EEF1B2	ARFGEF1	dis_mo	-0.00380398
HSD17B12	ARFGEF1	dis_mo	-0.03117
NCL	ARFGEF1	dis_mo	-0.00407825
NOP58	ARFGEF1	dis_mo	-0.00284817
PWP1	ARFGEF1	dis_po	0.015418
SQLE	ARFGEF1	dis_mo	-0.00681542
VPS18	ARFGEF1	dis_po	0.143079
EIF5B	ARFGEF2	dis_po	0.0121693
FYN	ARFGEF2	dis_mo	-0.0196942
PRPF40A	ARFGEF2	dis_po	0.016256
RHOB	ARFGEF2	dis_po	0.00394982
PRNP	ARHGAP15	dis_po	0.0192726
RAC2	ARHGAP15	dis_po	0.0635265
RHOC	ARHGAP15	dis_mo	-0.0393136
RHOQ	ARHGAP15	dis_mo	-0.0541471
SAPS1	ARHGAP15	dis_mo	-0.0685334
UBC	ARHGAP15	dis_po	0.0170203
RAC2	ARHGAP22	dis_po	0.0232769
RHOB	ARHGAP22	dis_mo	-0.0574221
RHOG	ARHGAP22	dis_mo	-0.035123
RHOU	ARHGAP23	dis_mo	-0.0552432
UBC	ARHGAP23	dis_mo	-0.0897086
MAP3K1	ARHGAP4	dis_po	0.0114958
RAC2	ARHGAP4	dis_po	0.0174541
RHOQ	ARHGAP4	dis_mo	-0.139668
RHOU	ARHGAP4	dis_po	0.0695683
STAT6	ARHGAP4	dis_mo	-0.00306301
UBC	ARHGAP4	dis_mo	-0.0331508
RAC2	ARHGAP8	dis_mo	-0.240157
RHOB	ARHGAP8	dis_po	0.15333
RHOG	ARHGAP8	dis_po	0.0799341
RHOU	ARHGAP8	dis_po	0.0174835
UBC	ARHGAP8	dis_po	0.0544838
ARHGDIB	ARHGDIA	dis_mo	-0.0268217
BAK1	ARHGDIA	dis_po	0.00592397
CADPS2	ARHGDIA	dis_po	0.0944561
PFKFB2	ARHGDIA	dis_mo	-0.0580655
RHOG	ARHGDIA	dis_mo	-0.0183103
SDHC	ARHGDIA	dis_mo	-0.106504
ANKRD1	ARHGDIB	dis_mo	-0.0326654
ARHGDIA	ARHGDIB	dis_mo	-0.0268217
EZR	ARHGDIB	dis_po	0.0306289
RHOB	ARHGDIB	dis_po	0.0135833
RHOG	ARHGDIB	dis_mo	-0.0737957
RHOU	ARHGDIB	dis_po	0.00883721
RAC2	ARHGEF17	dis_po	0.0662954
RHOB	ARHGEF17	dis_mo	-0.0135825
RHOC	ARHGEF17	dis_mo	-0.0190203
RHOQ	ARHGEF17	dis_po	0.00677043
RHOU	ARHGEF17	dis_mo	-0.0232348
ARL4C	ARHGEF3	dis_po	0.0804716
GNL3	ARHGEF3	dis_po	0.0139154
RHOB	ARHGEF3	dis_mo	-0.0364163
RHOQ	ARHGEF3	dis_po	0.0263546
RHOU	ARHGEF3	dis_po	0.0493241
RAC2	ARHGEF4	dis_mo	-0.0203906
RHOC	ARHGEF4	dis_po	0.0236176
RHOU	ARHGEF4	dis_po	0.0694648
UBC	ARHGEF5	dis_mo	-0.111091
ELAVL1	ARID5B	dis_mo	-0.168067
ISG15	ARID5B	dis_po	0.0408601
SOX2	ARID5B	dis_mo	-0.0831761
CTSC	ARIH1	dis_mo	-0.0482511
EIF4E3	ARIH1	dis_mo	-0.104063
EIF4G1	ARIH1	dis_po	0.00294452
FLNB	ARIH1	dis_mo	-0.00194634
JAK1	ARIH1	dis_po	0.0274977
PPM1B	ARIH1	dis_mo	-0.269297
APP	ARL4C	dis_mo	-0.264634
ARHGEF3	ARL4C	dis_po	0.0804716
UBC	ARL4C	dis_po	0.117312
APP	ARL5A	dis_mo	-0.0998601
CBX3	ARL5A	dis_po	0.0544594
ELAVL1	ARL5A	dis_mo	-0.298073
KPNA2	ARL5A	dis_po	0.169909
NUP50	ARL5A	dis_po	0.0570981
KPNA2	ARL5B	dis_po	0.0358722
SMAD3	ARL5B	dis_mo	-0.100691
BBS1	ARL6	dis_mo	-0.0569836
HES4	ARNT2	dis_po	0.0211677
SH3GL2	ARNT2	dis_po	0.00290105
TAX1BP3	ARNT2	dis_po	0.0338792
CANX	ARPC2	dis_mo	-0.0480725
CARHSP1	ARPC2	dis_mo	-0.299159
CYFIP2	ARPC2	dis_mo	-0.0210104
MICAL1	ARPC2	dis_mo	-0.524289
MYO1E	ARPC2	dis_po	0.0137613
PGM1	ARPC2	dis_po	0.0254418
UBE2Q2	ARPC2	dis_mo	-0.0204865
GADD45G	ARPC5L	dis_mo	-0.00226099
MYO1E	ARPC5L	dis_po	0.0893339
UBC	ARPC5L	dis_po	0.176702
ARRDC4	ARRB1	dis_mo	-0.0253096
ATP5A1	ARRB1	dis_mo	-0.247338
BACH2	ARRB1	dis_mo	-0.00768631
CPNE8	ARRB1	dis_mo	-0.0292065
CTTN	ARRB1	dis_po	0.0245514
EIF3I	ARRB1	dis_mo	-0.0209779
MAP3K1	ARRB1	dis_mo	-0.0226266
MT1A	ARRB1	dis_mo	-0.0841309
MYL6	ARRB1	dis_po	0.0270328
RALGDS	ARRB1	dis_mo	-0.139079
RPL6	ARRB1	dis_po	0.016349
TUBA4A	ARRB1	dis_mo	-0.0126453
ARRB1	ARRDC4	dis_mo	-0.0253096
GFRA3	ARTN	dis_mo	-0.183838
ARAP3	ASAP1	dis_mo	-0.0210871
ELAVL1	ASAP1	dis_mo	-0.0119218
PACSIN1	ASAP1	dis_mo	-0.0371351
PACSIN2	ASAP1	dis_mo	-0.0806981
PACSIN3	ASAP1	dis_mo	-0.0043308
PXN	ASAP1	dis_po	0.0558091
REPS2	ASAP1	dis_mo	-0.0300415
SH3GL2	ASAP1	dis_po	0.0256418
CRK	ASAP2	dis_mo	-0.00672333
FYN	ASAP2	dis_mo	-0.0278713
PXN	ASAP2	dis_po	0.0378268
REPS2	ASAP2	dis_po	0.00745313
TBRG4	ASAP2	dis_mo	-0.0433283
UBC	ASAP2	dis_po	0.174699
CRK	ASAP3	dis_po	0.307872
HSP90AA1	ASCC3	dis_mo	-0.0278034
SRF	ASCC3	dis_mo	-0.115715
UBC	ASCC3	dis_mo	-0.0591266
BUB1	ASF1A	dis_po	0.0111109
HIST1H2BH	ASF1A	dis_mo	-0.00644892
RUVBL1	ASF1A	dis_po	0.00429971
VPS16	ASF1A	dis_po	0.0050124
VPS18	ASF1A	dis_po	0.436913
FGFR4	ASGR1	dis_mo	-0.0824068
HPN	ASGR1	dis_mo	-0.0227407
HSP90B1	ASGR1	dis_po	0.0048443
STAT1	ASGR1	dis_po	0.114213
ISOC1	ASNS	dis_po	0.0355646
MYO1E	ASNS	dis_mo	-0.00881555
PSMD14	ASNS	dis_po	0.00169063
UBC	ASNS	dis_mo	-0.0110899
VCAM1	ASNS	dis_mo	-0.0133483
VCL	ASNS	dis_po	0.0157739
ATG3	ASS1	dis_mo	-0.0149936
CAPN1	ASS1	dis_mo	-0.00256864
DPP3	ASS1	dis_po	0.00283726
RUVBL2	ASS1	dis_mo	-0.00499964
TERF1	ASS1	dis_po	0.000146945
HSP90AA1	ATF3	dis_po	0.0961627
IGSF21	ATF3	dis_mo	-0.000780494
FOS	ATF4	dis_po	0.0370546
GPS2	ATF4	dis_po	0.0378779
JUN	ATF4	dis_mo	-0.198261
LDOC1	ATF4	dis_po	0.0262615
TGM2	ATF4	dis_mo	-0.0280564
UBC	ATF4	dis_po	0.0022961
CCND3	ATF5	dis_mo	-0.0597753
UBC	ATF5	dis_po	0.111032
ASS1	ATG3	dis_mo	-0.0149936
CCT6A	ATG3	dis_po	0.00224829
DFFA	ATG3	dis_mo	-0.00685737
ENO2	ATG3	dis_mo	-0.00618
HADHB	ATG3	dis_mo	-0.018272
HSPA2	ATG3	dis_po	0.0730429
PFN1	ATG3	dis_po	0.00813728
SH3YL1	ATG3	dis_po	0.197602
SQSTM1	ATG3	dis_po	0.0118092
TUBA4A	ATG3	dis_mo	-0.0289784
ACAT2	ATG5	dis_mo	-0.042748
ACLY	ATG5	dis_mo	-0.0132661
ACTA1	ATG5	dis_mo	-0.0197978
AHCY	ATG5	dis_po	0.00314395
AK2	ATG5	dis_mo	-0.00347021
ALDH1B1	ATG5	dis_po	0.0729604
ANXA2	ATG5	dis_mo	-0.0309433
ANXA5	ATG5	dis_mo	-0.00401596
ATP5D	ATG5	dis_po	0.0482182
ATP6V1G2	ATG5	dis_po	0.0703451
C1QBP	ATG5	dis_po	0.00266697
CMPK1	ATG5	dis_mo	-0.0176155
CSE1L	ATG5	dis_po	0.0100793
CTH	ATG5	dis_mo	-0.00485064
DAZAP1	ATG5	dis_mo	-0.0170141
EIF4A3	ATG5	dis_mo	-0.0023305
ENO2	ATG5	dis_po	0.0209768
EZR	ATG5	dis_mo	-0.0460106
FABP5	ATG5	dis_mo	-0.220405
FAM98A	ATG5	dis_mo	-0.026735
HNRNPA1	ATG5	dis_po	0.01124
HNRNPA3	ATG5	dis_po	0.00758124
HNRNPAB	ATG5	dis_po	0.0145071
HSPA4L	ATG5	dis_po	0.0283666
LAMP1	ATG5	dis_po	0.0274283
MATR3	ATG5	dis_po	0.0275487
MCM3	ATG5	dis_mo	-0.00211019
NME1	ATG5	dis_mo	-0.0349432
PARP1	ATG5	dis_po	0.0230303
PGRMC1	ATG5	dis_mo	-0.0228873
PRDX1	ATG5	dis_po	0.0142439
PRDX3	ATG5	dis_mo	-0.0267217
PSMA6	ATG5	dis_mo	-0.00501881
PSMB3	ATG5	dis_mo	-0.0465663
PSMB5	ATG5	dis_mo	-0.000374631
PSMD14	ATG5	dis_po	0.00649418
PYGL	ATG5	dis_mo	-0.00708079
RAB15	ATG5	dis_po	0.0996627
RALB	ATG5	dis_po	0.22243
REXO2	ATG5	dis_mo	-0.0128956
RNF135	ATG5	dis_mo	-0.0610692
RUVBL2	ATG5	dis_po	0.00235939
SDF2L1	ATG5	dis_po	0.115485
SIRT1	ATG5	dis_mo	-0.00143409
SLC1A5	ATG5	dis_mo	-0.0987152
SLC25A4	ATG5	dis_mo	-0.0110701
SLC3A2	ATG5	dis_po	0.00478997
TAGLN2	ATG5	dis_mo	-0.0341028
TALDO1	ATG5	dis_mo	-0.00763007
TKT	ATG5	dis_mo	-0.00860623
TRIM28	ATG5	dis_po	0.00591298
TUBA1C	ATG5	dis_po	0.00492623
TUBA4A	ATG5	dis_po	0.00565716
UCHL1	ATG5	dis_po	0.31498
RTN4	ATL1	dis_po	0.172924
TMED2	ATL1	dis_mo	-0.0856082
APP	ATL3	dis_mo	-0.074385
UBC	ATP11C	dis_po	0.318767
ATP1B1	ATP1A1	dis_mo	-0.0472286
CCDC50	ATP1A1	dis_mo	-0.0281922
CTSL2	ATP1A1	dis_mo	-0.0595173
DUSP6	ATP1A1	dis_po	0.0206582
EPCAM	ATP1A1	dis_mo	-0.692806
ERBB2	ATP1A1	dis_mo	-0.0104465
FOXO3	ATP1A1	dis_po	0.0234938
FXYD1	ATP1A1	dis_mo	-0.0905437
MAPK1	ATP1A1	dis_mo	-0.0245551
MAPK4	ATP1A1	dis_mo	-0.0483368
PKP2	ATP1A1	dis_mo	-0.00910359
PRKAG2	ATP1A1	dis_po	0.000631464
PRKCA	ATP1A1	dis_mo	-0.0017068
RGS7	ATP1A1	dis_po	0.01351
DDIT3	ATP1A2	dis_mo	-0.0514522
PRKAG2	ATP1A2	dis_po	0.00838725
RABGAP1	ATP1A2	dis_po	0.0364157
ATP1A1	ATP1B1	dis_mo	-0.0472286
B2M	ATP1B1	dis_po	0.0219949
DDAH2	ATP1B1	dis_mo	-0.0785693
FXYD1	ATP1B1	dis_po	0.0962929
AMFR	ATP2A2	dis_po	0.0993911
BCAR1	ATP2A2	dis_mo	-0.0243546
C12orf44	ATP2A2	dis_mo	-0.0229993
CASP3	ATP2A2	dis_po	0.00384518
ELAVL1	ATP2A2	dis_po	0.0122277
FXYD1	ATP2A2	dis_po	0.0406648
PKP3	ATP2A2	dis_po	0.0231587
SPP1	ATP2A2	dis_po	0.0147837
UBC	ATP2A2	dis_po	0.00393052
UBC	ATP2B4	dis_mo	-0.165998
ARRB1	ATP5A1	dis_mo	-0.247338
ATP5G1	ATP5A1	dis_po	0.0791432
BOP1	ATP5A1	dis_po	0.0595485
EIF4A1	ATP5A1	dis_po	0.816126
MTO1	ATP5A1	dis_po	0.0347909
PKP3	ATP5A1	dis_po	0.00195628
PRELID1	ATP5A1	dis_po	0.839716
SOX2	ATP5A1	dis_po	0.234696
UBC	ATP5A1	dis_mo	-0.87987
ATG5	ATP5D	dis_po	0.0482182
ATP5F1	ATP5D	dis_po	0.0460528
PSMD6	ATP5D	dis_po	0.0146447
UBC	ATP5D	dis_po	0.0458431
ATP5D	ATP5F1	dis_po	0.0460528
ATP6V1H	ATP5F1	dis_mo	-0.0205665
ETS1	ATP5F1	dis_mo	-0.0201957
NDUFB9	ATP5F1	dis_po	0.158805
SDHA	ATP5F1	dis_mo	-0.111866
UBC	ATP5F1	dis_mo	-0.0145818
UBR7	ATP5F1	dis_po	3.59285
ATP5A1	ATP5G1	dis_po	0.0791432
UBC	ATP5G1	dis_mo	-0.126522
FBXW4	ATP5H	dis_po	0.0358638
UBC	ATP5H	dis_po	0.0277756
FTSJ1	ATP6V0B	dis_mo	-0.0144332
CD9	ATP6V1B1	dis_po	0.0234735
HNRPDL	ATP6V1B1	dis_po	0.00655526
LAMP2	ATP6V1B1	dis_po	0.00423858
MYO3B	ATP6V1B1	dis_mo	-0.10159
RRAS	ATP6V1B1	dis_po	0.0133929
S100A11	ATP6V1B1	dis_po	0.000337912
STOM	ATP6V1B1	dis_mo	-0.0799521
VAMP8	ATP6V1B1	dis_po	0.0184501
ATG5	ATP6V1G2	dis_po	0.0703451
C12orf44	ATP6V1G2	dis_mo	-0.0542431
DDIT3	ATP6V1G2	dis_mo	-0.00980658
FOXO3	ATP6V1G2	dis_mo	-0.00950908
PRKAG2	ATP6V1G2	dis_mo	-0.0780053
UBC	ATP6V1G2	dis_mo	-0.0240389
ATP5F1	ATP6V1H	dis_mo	-0.0205665
GMPPB	ATP6V1H	dis_mo	-0.0431644
PDXDC1	ATP6V1H	dis_po	0.0292865
PROCR	ATP6V1H	dis_po	0.0484714
UBC	ATP6V1H	dis_mo	-0.00459839
USP3	ATP6V1H	dis_po	0.00110703
USP47	ATP6V1H	dis_mo	-0.0015781
COPS6	ATP9A	dis_mo	-0.0897468
KIAA1279	ATXN2	dis_po	0.0660654
PLS3	ATXN2	dis_mo	-0.00539998
JUB	AURKAIP1	dis_po	0.298942
ERCC6L	AURKB	dis_po	0.0521032
JARID2	AURKB	dis_po	0.0177339
KLHL9	AURKB	dis_mo	-0.0233334
PAFAH1B1	AURKB	dis_po	0.100354
SIRT1	AURKB	dis_po	0.0128706
ZWILCH	AURKB	dis_mo	-0.00364015
CSNK2A2	AUTS2	dis_mo	-0.0667309
FA2H	AVL9	dis_mo	-0.0343556
PDIA4	AVL9	dis_po	0.127009
POLR1D	AVL9	dis_po	0.181787
RPS24	AVL9	dis_mo	-0.0432351
SMARCA5	AVL9	dis_po	0.0211158
UBC	AVL9	dis_mo	-0.428503
UBC	AZIN1	dis_po	0.0626627
AP1M2	B2M	dis_mo	-0.00154904
ATP1B1	B2M	dis_po	0.0219949
CANX	B2M	dis_po	0.00236927
CD19	B2M	dis_po	0.00189152
EMP3	B2M	dis_mo	-0.0262244
HLA-DMA	B2M	dis_po	0.00879323
JAM2	B2M	dis_po	0.0325615
MICB	B2M	dis_mo	-0.0907023
PIK3CD	B2M	dis_po	0.0128898
PRSS23	B2M	dis_po	0.0206853
SPINT2	B2M	dis_mo	-0.0563465
TFRC	B2M	dis_po	0.000884943
TMPRSS2	B2M	dis_mo	-0.0387783
MUC4	B3GNT2	dis_mo	-0.51241
UBC	B3GNT2	dis_po	0.580772
ARRB1	BACH2	dis_mo	-0.00768631
BCL6	BACH2	dis_mo	-0.0722064
DDIT3	BACH2	dis_po	0.0769123
NCOR2	BACH2	dis_mo	-0.0177081
NFE2L3	BACH2	dis_po	0.0501823
BAK1	BAD	dis_mo	-0.0344795
BAX	BAD	dis_po	0.0253167
CDKN1A	BAD	dis_mo	-0.00525851
HRK	BAD	dis_mo	-0.0343607
PIM1	BAD	dis_po	0.0935928
RPS6KA2	BAD	dis_mo	-0.0139959
DLL1	BAIAP2L1	dis_mo	-0.0574425
SHANK3	BAIAP2L1	dis_mo	-0.0190609
TERF1	BAIAP2L1	dis_po	0.0742193
UBC	BAIAP2L1	dis_po	0.0373783
ARHGDIA	BAK1	dis_po	0.00592397
BAD	BAK1	dis_mo	-0.0344795
BOK	BAK1	dis_po	0.0737226
HRK	BAK1	dis_mo	-0.0954262
HSPD1	BAK1	dis_po	0.00645385
ACVR1B	BAMBI	dis_mo	-0.0197164
BMPR1A	BAMBI	dis_mo	-0.100453
SMAD7	BAMBI	dis_mo	-0.159172
TGFBR2	BAMBI	dis_po	0.0537552
UBC	BAMBI	dis_po	0.133058
TLE2	BARHL1	dis_po	0.0673856
BAD	BAX	dis_po	0.0253167
BCL2	BAX	dis_mo	-0.00461552
BCL2L13	BAX	dis_mo	-0.0452324
BNIPL	BAX	dis_mo	-0.282049
CAPN1	BAX	dis_po	0.0156395
HRK	BAX	dis_po	0.09326
PMAIP1	BAX	dis_mo	-0.0407763
PSMC3	BAX	dis_po	0.0073836
RTN4	BAX	dis_mo	-0.035392
TOMM40	BAX	dis_po	0.0213346
ARL6	BBS1	dis_mo	-0.0569836
UBC	BBS1	dis_mo	-0.131688
CCL2	BCAN	dis_mo	-0.1464
CD44	BCAN	dis_po	0.0541632
CHST12	BCAN	dis_mo	-0.0202193
CHST13	BCAN	dis_mo	-0.2534
CHSY1	BCAN	dis_mo	-0.0434366
FBLN2	BCAN	dis_mo	-0.101483
MMP9	BCAN	dis_po	0.00286468
STAT1	BCAN	dis_mo	-0.0153219
TIMP3	BCAN	dis_mo	-0.133252
TIMP4	BCAN	dis_mo	-0.017738
CLGN	BCAP29	dis_mo	-0.0116409
ELAVL1	BCAP29	dis_po	0.107957
PDXDC1	BCAP29	dis_mo	-0.181502
UBC	BCAP29	dis_mo	-0.0931709
ATP2A2	BCAR1	dis_mo	-0.0243546
CNTN1	BCAR1	dis_mo	-0.0136543
IRS1	BCAR1	dis_mo	-0.00179479
JUB	BCAR1	dis_mo	-0.242356
KDR	BCAR1	dis_mo	-0.00214858
PDGFRB	BCAR1	dis_po	0.00491518
SH2D3A	BCAR1	dis_mo	-0.134657
SH2D3C	BCAR1	dis_mo	-0.227016
TEK	BCAR1	dis_mo	-0.0342542
AMD1	BCAR3	dis_po	0.00889156
CSE1L	BCAR3	dis_mo	-0.00184336
EIF3M	BCAR3	dis_po	0.0864659
ERBB3	BCAR3	dis_mo	-0.0023903
PFAS	BCAR3	dis_mo	-0.00144522
RPL38	BCAR3	dis_mo	-0.00465773
SYNCRIP	BCAR3	dis_po	0.0051861
C12orf44	BCCIP	dis_po	0.0385163
GNS	BCCIP	dis_po	0.00498164
SIRT1	BCCIP	dis_mo	-0.0130759
AHCY	BCKDK	dis_po	0.0189566
DPM1	BCKDK	dis_mo	-0.0157222
EMG1	BCKDK	dis_mo	-0.113178
NR5A2	BCKDK	dis_po	0.00877792
RTCD1	BCKDK	dis_po	0.0739192
SQSTM1	BCKDK	dis_po	0.015867
UBC	BCKDK	dis_po	0.0877452
CDK6	BCL11A	dis_mo	-0.0271173
MTA1	BCL11A	dis_mo	-0.042601
NR2F2	BCL11A	dis_mo	-1.54129
BAX	BCL2	dis_mo	-0.00461552
BFAR	BCL2	dis_po	0.0377304
CASP3	BCL2	dis_mo	-0.00578695
EPHB2	BCL2	dis_mo	-0.0646218
HRK	BCL2	dis_po	0.173391
ANTXR1	BCL2L1	dis_po	0.42692
BCL2L13	BCL2L1	dis_po	0.0253413
BFAR	BCL2L1	dis_po	0.150989
BID	BCL2L1	dis_po	0.00777368
FBP1	BCL2L1	dis_po	0.0131357
GLOD4	BCL2L1	dis_po	0.00787035
HRK	BCL2L1	dis_po	0.00548113
ITPR3	BCL2L1	dis_mo	-0.0942621
RTN4	BCL2L1	dis_mo	-0.00492022
ZNF219	BCL2L1	dis_mo	-0.246147
BAX	BCL2L13	dis_mo	-0.0452324
BCL2L1	BCL2L13	dis_po	0.0253413
BID	BCL2L13	dis_mo	-0.0388896
SLC25A4	BCL2L13	dis_po	0.0145756
UBC	BCL2L13	dis_po	0.0291086
FBXW8	BCL3	dis_mo	-0.00728091
HSPA4	BCL3	dis_po	0.0132773
JUN	BCL3	dis_po	0.0167803
NCOA6	BCL3	dis_mo	-0.005215
RAB9A	BCL3	dis_mo	-1.37816
RUVBL1	BCL3	dis_mo	-0.0174412
RXRA	BCL3	dis_po	0.00501334
BACH2	BCL6	dis_mo	-0.0722064
BCL6B	BCL6	dis_mo	-0.00464561
FOS	BCL6	dis_po	0.010879
FOSL1	BCL6	dis_mo	-0.00154075
MTA3	BCL6	dis_po	0.00378785
PPARD	BCL6	dis_mo	-0.0563437
BCL6	BCL6B	dis_mo	-0.00464561
ELAVL1	BCL9	dis_mo	-0.175558
USP21	BEND3	dis_mo	-0.0246671
BCL2	BFAR	dis_po	0.0377304
BCL2L1	BFAR	dis_po	0.150989
SYK	BFAR	dis_mo	-0.0123852
UBC	BFAR	dis_mo	-0.104609
VIM	BFSP1	dis_po	0.125127
BCL2L1	BID	dis_po	0.00777368
BCL2L13	BID	dis_mo	-0.0388896
EZR	BID	dis_mo	-0.0414027
HRK	BID	dis_mo	-0.147568
RTN4	BID	dis_mo	-0.00202195
SQSTM1	BID	dis_mo	-0.00801507
TNFRSF10B	BID	dis_po	0.071588
CBX4	BMI1	dis_mo	-0.0990419
PHC1	BMI1	dis_po	0.174635
PHC2	BMI1	dis_po	0.131968
SOCS2	BMI1	dis_po	0.0244064
UBC	BMI1	dis_po	0.0363499
BMP4	BMP2	dis_po	0.00808728
CER1	BMP2	dis_mo	-0.0337264
COL2A1	BMP2	dis_po	0.00717996
WFIKKN2	BMP2	dis_po	0.0166727
BMP2	BMP4	dis_po	0.00808728
FST	BMP4	dis_mo	-0.0617444
FSTL1	BMP4	dis_mo	-0.0478749
RHBDL3	BMP4	dis_mo	-0.0392468
RRAS2	BMP4	dis_mo	-0.183838
WFIKKN1	BMP4	dis_mo	-0.152101
WFIKKN2	BMP4	dis_mo	-0.0115803
BAMBI	BMPR1A	dis_mo	-0.100453
FST	BMPR1A	dis_po	0.0317769
TSC22D1	BMPR1A	dis_po	0.0454481
IRF6	BNC2	dis_mo	-0.150232
HRK	BNIP3L	dis_po	0.0306423
LMNA	BNIP3L	dis_mo	-0.0042796
UBC	BNIP3L	dis_mo	-0.027148
BAX	BNIPL	dis_mo	-0.282049
CDH1	BOC	dis_mo	-0.0275938
NEO1	BOC	dis_po	0.0227727
BAK1	BOK	dis_po	0.0737226
ATP5A1	BOP1	dis_po	0.0595485
C18orf25	BOP1	dis_po	0.0624509
EIF4A1	BOP1	dis_po	0.0224243
LSG1	BOP1	dis_mo	-0.0360255
ME1	BOP1	dis_po	0.00580668
PDIA4	BOP1	dis_mo	-0.0164578
PPAN	BOP1	dis_po	0.00960133
SDAD1	BOP1	dis_mo	-0.00672609
UBC	BOP1	dis_po	0.00195525
UBE3B	BOP1	dis_po	0.0189913
EBF3	BPTF	dis_mo	-0.124911
SQSTM1	BPTF	dis_po	0.0771041
UBC	BPTF	dis_mo	-0.0884706
CEBPZ	BRIX1	dis_mo	-0.0138516
EBNA1BP2	BRIX1	dis_po	0.00557849
MDN1	BRIX1	dis_po	0.0055794
PAK1IP1	BRIX1	dis_mo	-0.00300037
RPF2	BRIX1	dis_mo	-0.0380912
WDR12	BRIX1	dis_mo	-0.0471977
ACTC1	BRP44L	dis_po	0.0265128
MAGED1	BRP44L	dis_mo	-0.0536769
UBC	BSN	dis_po	0.253738
TFRC	BST2	dis_mo	-0.0337505
APP	BTF3	dis_mo	-0.14666
DSTN	BTF3	dis_po	0.0447176
KIAA0363	BTF3	dis_po	0.0215376
RPL29	BTF3	dis_po	0.0273905
RRM2B	BTF3	dis_po	0.0760405
HLA-G	BTN3A2	dis_mo	-0.0807814
SIGIRR	BTN3A2	dis_mo	-0.147993
ASF1A	BUB1	dis_po	0.0111109
CLIP1	BUB1	dis_mo	-0.0269989
FZD5	BUB1	dis_po	0.166554
MLF1IP	BUB1	dis_po	0.0973372
PAFAH1B1	BUB1	dis_po	0.00746519
RHOQ	BUB1	dis_mo	-0.00322004
TUBA4A	BUB1	dis_po	0.00267589
CLIP1	BUB1B	dis_mo	-0.00685913
MLF1IP	BUB1B	dis_mo	-0.0387765
NUP107	BUB1B	dis_po	0.0505314
PAFAH1B1	BUB1B	dis_po	0.0170184
USP7	BUB1B	dis_po	0.0421868
ADRM1	BUB3	dis_mo	-0.00570825
CLIP1	BUB3	dis_po	0.010195
RHOB	BUB3	dis_po	0.0122467
STAT1	BUB3	dis_mo	-0.00387233
ELAVL1	C10orf114	dis_mo	-0.127374
TBC1D4	C12orf35	dis_po	0.0338623
ACLY	C12orf44	dis_po	0.0112057
AGPS	C12orf44	dis_mo	-0.10265
ATP2A2	C12orf44	dis_mo	-0.0229993
ATP6V1G2	C12orf44	dis_mo	-0.0542431
BCCIP	C12orf44	dis_po	0.0385163
CBR1	C12orf44	dis_mo	-0.0431034
CPNE7	C12orf44	dis_mo	-0.0832882
CSE1L	C12orf44	dis_mo	-0.000503585
DAZAP1	C12orf44	dis_po	0.00368211
DDX21	C12orf44	dis_po	0.00307264
DSTN	C12orf44	dis_po	0.0066159
EEF1A2	C12orf44	dis_mo	-0.0771473
EFTUD2	C12orf44	dis_mo	-0.00542547
EIF4A1	C12orf44	dis_mo	-0.00948628
FKBP4	C12orf44	dis_mo	-0.0164064
FSCN1	C12orf44	dis_mo	-0.000973192
GFPT1	C12orf44	dis_mo	-0.0622115
GSTO1	C12orf44	dis_mo	-0.0359205
GSTP1	C12orf44	dis_mo	-0.00998445
HADHB	C12orf44	dis_po	0.135169
HK1	C12orf44	dis_po	0.0301742
HSD17B4	C12orf44	dis_mo	-0.057359
HSP90B1	C12orf44	dis_po	0.00573144
HSPB1	C12orf44	dis_mo	-0.0142143
LGALS3BP	C12orf44	dis_po	0.108692
MTHFD1	C12orf44	dis_po	0.00251045
MTHFD1L	C12orf44	dis_po	0.0543362
NANS	C12orf44	dis_mo	-0.170315
NUP205	C12orf44	dis_mo	-0.0861383
PGM1	C12orf44	dis_mo	-0.0152351
PSMD1	C12orf44	dis_po	0.0405546
PSPC1	C12orf44	dis_mo	-0.0303969
RUVBL1	C12orf44	dis_po	0.0179056
SLC25A4	C12orf44	dis_mo	-0.0149645
SLC3A2	C12orf44	dis_mo	-0.0029832
SOD1	C12orf44	dis_po	0.0148062
TARS	C12orf44	dis_po	0.000412175
TCP1	C12orf44	dis_po	0.00161562
TIMM44	C12orf44	dis_mo	-0.00549699
TMX1	C12orf44	dis_po	0.0295682
TPM1	C12orf44	dis_po	0.00352851
TUBA4A	C12orf44	dis_mo	-0.00503803
TUBB6	C12orf44	dis_mo	-0.0169023
TXNRD1	C12orf44	dis_po	0.00431071
RBPJ	C12orf52	dis_po	0.00719436
ACO1	C12orf57	dis_mo	-0.237471
COL1A1	C12orf57	dis_po	0.0579988
LETM1	C12orf57	dis_mo	-0.0937815
PLXNB2	C12orf57	dis_mo	-0.00162982
SNAP23	C12orf57	dis_po	0.0775188
PLSCR1	C16orf48	dis_mo	-0.0380887
NCOA6	C16orf53	dis_mo	-0.039554
APP	C18orf21	dis_po	0.165276
BOP1	C18orf25	dis_po	0.0624509
CSNK2A2	C18orf25	dis_mo	-0.0200864
UBC	C1GALT1	dis_po	0.162019
ATG5	C1QBP	dis_po	0.00266697
HRK	C1QBP	dis_mo	-0.108429
KLKB1	C1QBP	dis_mo	-0.0113909
MAPK1	C1QBP	dis_mo	-0.00212483
MRPL19	C1QBP	dis_mo	-0.0202594
MRPL21	C1QBP	dis_po	0.376496
MRPS2	C1QBP	dis_po	0.00453428
PHB	C1QBP	dis_mo	-0.00421067
PRCP	C1QBP	dis_mo	-0.323404
SFRS1	C1QBP	dis_mo	-0.0338981
TP53RK	C1QBP	dis_po	0.00110262
SERPINA5	C1QTNF5	dis_po	0.00409642
UBC	C1orf31	dis_po	0.155711
USO1	C1orf94	dis_mo	-0.0336592
UBC	C21orf33	dis_mo	-0.166494
APP	C22orf13	dis_po	0.0912789
UBC	C22orf13	dis_mo	-0.101591
APP	C2orf56	dis_mo	-0.0552667
UBC	C3orf37	dis_mo	-0.235889
ELAVL1	C3orf52	dis_po	0.327999
H1F0	C4orf14	dis_mo	-0.116764
HSPA8	C4orf14	dis_mo	-0.00753218
ADRA2A	C5	dis_po	0.0672517
CXCL5	C5	dis_po	0.0200889
CXCR4	C5	dis_mo	-0.013448
GAL	C5	dis_mo	-0.279636
LPAR1	C5	dis_po	0.00167205
NMU	C5	dis_mo	-0.0633301
NPW	C5	dis_po	0.140412
PDYN	C5	dis_mo	-0.0489089
UBC	C5	dis_po	0.0191395
APPBP2	C6orf106	dis_mo	-0.0535273
LDB3	C6orf106	dis_mo	-0.00190468
UBC	C6orf106	dis_po	0.00428587
ELAVL1	C6orf192	dis_po	0.195082
UBC	C6orf192	dis_mo	-0.117952
PSMD14	C6orf211	dis_po	0.299114
SF3B4	C6orf211	dis_po	0.0755696
KIFC2	C7orf20	dis_po	0.0347078
PTMS	C7orf20	dis_mo	-0.120643
APP	C7orf41	dis_mo	-0.0717605
UBC	C7orf41	dis_po	0.160262
CPNE8	C9orf169	dis_po	0.132461
PRR3	C9orf169	dis_mo	-0.108099
TSC22D1	C9orf9	dis_po	0.00489702
SLC2A2	CA4	dis_po	0.067388
SLC4A11	CA4	dis_mo	-0.0107451
CCNA1	CABLES1	dis_mo	-0.129891
CCNE1	CABLES1	dis_mo	-0.0437335
FOS	CACYBP	dis_mo	-0.0392914
FTSJ1	CACYBP	dis_po	0.0848644
HSP90AA1	CACYBP	dis_po	0.0112344
MAPK13	CACYBP	dis_mo	-0.00646438
TBL1X	CACYBP	dis_po	0.103448
VCAM1	CACYBP	dis_mo	-0.00345691
ARHGDIA	CADPS2	dis_po	0.0944561
NRD1	CALCA	dis_po	0.0492915
VIPR1	CALCA	dis_mo	-0.0193332
MYL6	CALD1	dis_mo	-0.0332162
MYL9	CALD1	dis_po	0.00884114
TERF1	CALD1	dis_mo	-0.0571287
CKMT1B	CALM1	dis_po	0.346192
CLIP1	CALM1	dis_po	0.0249828
DDAH1	CALM1	dis_po	0.109448
ELAVL1	CALM1	dis_mo	-0.0104696
GCLM	CALM1	dis_mo	-0.11728
GRB7	CALM1	dis_mo	-0.00767978
GRM3	CALM1	dis_po	0.0490864
HERC2	CALM1	dis_po	0.171988
HMMR	CALM1	dis_po	0.0909995
HSPA4	CALM1	dis_mo	-0.00424145
ITGA6	CALM1	dis_mo	-0.139201
ITPKB	CALM1	dis_po	0.090785
LACTB	CALM1	dis_mo	-0.0307626
RALB	CALM1	dis_mo	-0.0863016
RIT2	CALM1	dis_mo	-0.179668
SLTM	CALM1	dis_mo	-0.0104613
SPP1	CALM1	dis_po	0.0152263
SYT1	CALM1	dis_po	0.0384487
ACSL1	CALR	dis_po	0.00242394
GPM6A	CALR	dis_po	0.0156587
HSP90B1	CALR	dis_mo	-0.00724086
TAP2	CALR	dis_po	0.20989
VWF	CALR	dis_mo	-0.0164331
UBC	CAMKV	dis_po	0.238615
AMFR	CANX	dis_mo	-0.019948
ARPC2	CANX	dis_mo	-0.0480725
B2M	CANX	dis_po	0.00236927
CD74	CANX	dis_mo	-0.029688
HLA-G	CANX	dis_mo	-0.00351858
LDLR	CANX	dis_mo	-0.0102001
PGRMC1	CANX	dis_mo	-0.0717238
PMP22	CANX	dis_po	0.0158054
PRKAG2	CANX	dis_po	0.0071083
TMX1	CANX	dis_mo	-0.00635293
CBS	CAP2	dis_mo	-0.00324701
DUSP14	CAP2	dis_po	0.00484729
ISYNA1	CAP2	dis_po	0.0313962
PRPF40A	CAP2	dis_mo	-0.00139357
PSMD14	CAP2	dis_po	0.016648
REXO2	CAP2	dis_po	0.0128683
SLIT2	CAP2	dis_po	0.499191
TMEM30B	CAP2	dis_mo	-0.0522551
UBC	CAP2	dis_mo	-0.00282262
HAX1	CAPG	dis_po	0.0152398
UBC	CAPG	dis_po	0.399925
ACTC1	CAPN1	dis_mo	-0.095157
ASS1	CAPN1	dis_mo	-0.00256864
BAX	CAPN1	dis_po	0.0156395
CDH1	CAPN1	dis_po	0.00990559
COL1A1	CAPN1	dis_mo	-0.0307699
CSTB	CAPN1	dis_po	0.0565357
CTSC	CAPN1	dis_mo	-0.103942
GNS	CAPN1	dis_po	0.013483
IL1A	CAPN1	dis_mo	-0.052822
NDUFB7	CAPN1	dis_po	0.158472
PRMT5	CAPN1	dis_mo	-0.0122586
RPS6KA1	CAPN1	dis_po	0.013382
SPTBN1	CAPN1	dis_po	0.00137815
UBC	CAPN1	dis_mo	-0.01024
APP	CAPSL	dis_po	0.144256
CBLB	CARD11	dis_po	0.0326861
DEDD	CARD11	dis_po	0.191587
GPS1	CARD11	dis_mo	-0.00119848
UBC	CARD11	dis_mo	-0.0831496
WDR1	CARD11	dis_mo	-0.02602
ARPC2	CARHSP1	dis_mo	-0.299159
RPS6KA1	CARHSP1	dis_po	0.177164
SGK1	CARHSP1	dis_po	0.189059
STC2	CARHSP1	dis_mo	-0.160126
TSC22D1	CARHSP1	dis_mo	-0.0189398
UBC	CARHSP1	dis_po	0.113027
GART	CARS	dis_mo	-0.00866105
HSP90AA1	CARS	dis_po	0.222754
KARS	CARS	dis_mo	-0.0310775
PIM2	CARS	dis_mo	-0.0673616
UBC	CARS	dis_po	0.00791946
ATP2A2	CASP3	dis_po	0.00384518
BCL2	CASP3	dis_mo	-0.00578695
CAV1	CASP3	dis_mo	-0.0089984
CD2AP	CASP3	dis_po	0.00670611
CDKN1A	CASP3	dis_po	0.000819206
DIABLO	CASP3	dis_po	0.121962
NOTCH3	CASP3	dis_po	0.0239981
PDE5A	CASP3	dis_mo	-0.126306
THY1	CASP3	dis_mo	-0.00216114
USO1	CASP3	dis_po	0.00720199
CASP3	CAV1	dis_mo	-0.0089984
CD44	CAV1	dis_mo	-0.00280575
CXCR4	CAV1	dis_mo	-0.00283726
GRK5	CAV1	dis_po	0.00202323
NOS2A	CAV1	dis_po	0.0174104
SQSTM1	CAV1	dis_mo	-0.00412757
TMED2	CAV1	dis_po	0.00376434
UBC	CAV1	dis_mo	-0.0347935
CBLC	CAV2	dis_po	0.0190461
NOS2A	CAV2	dis_po	0.253048
CARD11	CBLB	dis_po	0.0326861
KDR	CBLB	dis_po	0.0100881
KIAA0664	CBLB	dis_mo	-0.396157
KIT	CBLB	dis_po	0.00733753
PLCG2	CBLB	dis_po	0.0212869
RPS6KA1	CBLB	dis_po	0.00638162
ANXA3	CBLC	dis_po	0.00917225
CAV2	CBLC	dis_po	0.0190461
EPHA1	CBLC	dis_po	0.0172425
EPHA2	CBLC	dis_mo	-0.0127047
FGFR1	CBLC	dis_po	0.0159824
KDR	CBLC	dis_mo	-0.0215831
RET	CBLC	dis_mo	-0.00149266
TGFB1I1	CBLC	dis_po	0.0121633
TRIP6	CBLC	dis_mo	-0.0186971
USP21	CBLC	dis_po	0.187424
C12orf44	CBR1	dis_mo	-0.0431034
FTSJ1	CBR1	dis_mo	-0.0513796
MAPK13	CBR1	dis_mo	-0.0143294
UBC	CBR1	dis_po	0.064491
ADA	CBS	dis_mo	-0.108383
AK2	CBS	dis_mo	-0.00713256
CAP2	CBS	dis_mo	-0.00324701
CSNK1D	CBS	dis_po	0.00716651
CYP51A1	CBS	dis_mo	-0.0112671
DERA	CBS	dis_po	0.0429902
EARS2	CBS	dis_mo	-0.0676859
EEF1B2	CBS	dis_mo	-0.0349864
ENO3	CBS	dis_mo	-0.013921
GCH1	CBS	dis_po	0.00218806
GSR	CBS	dis_po	0.0219064
GYS1	CBS	dis_po	0.00461729
KIAA0020	CBS	dis_mo	-0.0138355
ME1	CBS	dis_po	0.00999534
NME2	CBS	dis_po	0.0019353
PGM1	CBS	dis_po	0.000554572
PMM2	CBS	dis_po	0.00294375
POLR1D	CBS	dis_mo	-0.00233129
PPA1	CBS	dis_mo	-0.0104302
PRKCB1	CBS	dis_po	0.171785
PSMA1	CBS	dis_mo	-0.0144312
RAN	CBS	dis_po	0.00223829
REEP5	CBS	dis_po	0.00654228
RUVBL1	CBS	dis_mo	-0.000901523
TUBA4A	CBS	dis_po	0.093378
WDR46	CBS	dis_mo	-0.00462458
ARL5A	CBX3	dis_po	0.0544594
DDX21	CBX3	dis_mo	-0.00366195
DNMT3B	CBX3	dis_mo	-0.242182
GRB10	CBX3	dis_mo	-0.0228298
HMGN2	CBX3	dis_mo	-0.0111572
HSPE1	CBX3	dis_mo	-0.0484331
KLF11	CBX3	dis_mo	-0.00809953
PTMS	CBX3	dis_po	0.0142124
TRIM28	CBX3	dis_po	0.00086355
VCAM1	CBX3	dis_po	0.0289368
BMI1	CBX4	dis_mo	-0.0990419
CHD7	CBX4	dis_po	0.602575
PHC2	CBX4	dis_po	0.0414415
RUVBL2	CBX4	dis_mo	-0.0184703
SKIL	CBX4	dis_po	0.0474993
STAMBPL1	CBX4	dis_po	0.128617
USP7	CBX4	dis_mo	-0.0118022
YWHAH	CBX4	dis_po	0.0146515
ZEB2	CBX4	dis_po	0.0881675
ZNF165	CCDC130	dis_po	0.863756
ATP1A1	CCDC50	dis_mo	-0.0281922
GCDH	CCDC50	dis_mo	-0.0214176
PSMC4	CCDC50	dis_po	0.0648288
RPS15A	CCDC50	dis_po	0.0316614
RPS7	CCDC50	dis_mo	-0.0120033
SHC1	CCDC50	dis_mo	-0.0517695
CSNK2A2	CCDC59	dis_po	0.0240574
TSC22D1	CCDC59	dis_po	0.00705616
USP7	CCDC6	dis_mo	-0.109181
CSNK2A2	CCDC86	dis_po	0.0192561
UBC	CCDC86	dis_mo	-0.0400382
ELAVL1	CCDC92	dis_po	0.0193449
LDB3	CCDC92	dis_po	0.00935376
PSMD8	CCDC92	dis_mo	-0.131592
ANXA2	CCL2	dis_po	0.00291193
BCAN	CCL2	dis_mo	-0.1464
CCRL1	CCL2	dis_po	0.309329
COL5A2	CCL2	dis_mo	-0.0110137
CTGF	CCL2	dis_po	0.10147
FSTL1	CCL2	dis_mo	-0.0136813
LAMB1	CCL2	dis_po	0.00453737
F2RL1	CCL26	dis_po	0.150159
HTR2C	CCL26	dis_mo	-0.0210912
CABLES1	CCNA1	dis_mo	-0.129891
NTAN1	CCNA1	dis_mo	-0.312685
OAT	CCNA1	dis_po	0.00573604
PFAS	CCNA1	dis_po	0.022617
PSMD6	CCNA1	dis_mo	-0.00373724
TGFB1I1	CCNA1	dis_mo	-0.0156968
TRIM28	CCNA1	dis_po	0.0461251
TUFM	CCNA1	dis_mo	-0.0515638
COPS6	CCNA2	dis_po	0.0803645
KAT2B	CCNA2	dis_mo	-0.0913694
PSMA6	CCNA2	dis_mo	-0.0297908
UBC	CCNA2	dis_po	0.0111944
UBC	CCNB1IP1	dis_mo	-0.28742
KAT2B	CCNC	dis_mo	-0.00320798
MBP	CCNC	dis_po	0.0102941
RBPJ	CCNC	dis_mo	-0.0305157
SOCS2	CCNC	dis_mo	-0.0124055
VDAC3	CCNC	dis_mo	-0.0243335
ATF5	CCND3	dis_mo	-0.0597753
CDK6	CCND3	dis_mo	-0.0167378
CRABP2	CCND3	dis_po	0.0496226
EFEMP2	CCND3	dis_po	0.0300706
ETV1	CCND3	dis_mo	-0.0452522
MAPK4	CCND3	dis_po	0.0357559
MYB	CCND3	dis_po	0.00444193
NME1	CCND3	dis_po	0.134361
SIL1	CCND3	dis_po	0.0130006
CABLES1	CCNE1	dis_mo	-0.0437335
FOXM1	CCNE1	dis_po	0.0154613
MARCKS	CCNE1	dis_po	0.0216022
PKMYT1	CCNE1	dis_mo	-0.0542183
EFEMP2	CCNK	dis_mo	-0.0125469
ELAVL1	CCNK	dis_po	0.00282318
NECAB2	CCNK	dis_mo	-0.0900074
RBPMS	CCNK	dis_po	0.0796825
CCL2	CCRL1	dis_po	0.309329
DDIT3	CCT3	dis_po	0.0083159
EIF2B2	CCT3	dis_mo	-0.010738
ENO3	CCT3	dis_mo	-0.0550106
FBXW8	CCT3	dis_po	0.00924886
ISG15	CCT3	dis_po	0.00455384
LSG1	CCT3	dis_mo	-0.0103289
PSMA6	CCT3	dis_po	0.00219183
PSMD1	CCT3	dis_mo	-0.00842362
PSMD4	CCT3	dis_po	0.00921837
SOD2	CCT3	dis_mo	-0.00618268
STRN	CCT3	dis_mo	-0.0469808
SUCLG1	CCT3	dis_mo	-0.00982031
TP53RK	CCT3	dis_po	0.00490056
TUBA4A	CCT3	dis_po	0.000534345
VDAC3	CCT3	dis_mo	-0.0040513
ATG3	CCT6A	dis_po	0.00224829
DDIT3	CCT6A	dis_mo	-0.00142299
DNPEP	CCT6A	dis_po	0.173299
PPA1	CCT6A	dis_po	0.00763784
PPP2R2D	CCT6A	dis_mo	-0.0230728
RPL37	CCT6A	dis_mo	-0.0287788
SAMM50	CCT6A	dis_mo	-0.0024613
DDX49	CCT7	dis_mo	-0.00312162
FBXW8	CCT7	dis_mo	-0.00753592
FOXO3	CCT7	dis_po	0.0033374
HSPA8	CCT7	dis_po	0.0096634
PKP2	CCT7	dis_po	0.000499658
PPP2R2C	CCT7	dis_mo	-0.0109705
PRPF40A	CCT7	dis_mo	-0.00382486
PSMC3	CCT7	dis_mo	-0.0041435
SSSCA1	CCT7	dis_mo	-0.0103959
TUBA4A	CCT7	dis_mo	-0.0103949
F11R	CD151	dis_mo	-0.00195927
ITGA3	CD151	dis_po	0.0622975
ITGA6	CD151	dis_mo	-0.144381
ITGB1	CD151	dis_po	0.1134
LAMC2	CD151	dis_po	0.0212311
PTGFRN	CD151	dis_po	0.0572207
UBC	CD151	dis_mo	-0.162556
B2M	CD19	dis_po	0.00189152
CD72	CD19	dis_mo	-0.192555
IFITM1	CD19	dis_mo	-0.152433
MAG	CD19	dis_po	0.102248
MAPK1	CD19	dis_po	0.0324857
SYK	CD19	dis_po	0.028483
CASP3	CD2AP	dis_po	0.00670611
CDH3	CD2AP	dis_mo	-0.253651
KDR	CD2AP	dis_mo	-0.00781965
LMNA	CD2AP	dis_po	0.00701957
NOLC1	CD2AP	dis_mo	-0.00777975
PDGFRB	CD2AP	dis_po	0.00642732
PRKCB1	CD2AP	dis_po	0.134218
PRKCH	CD2AP	dis_mo	-0.0135042
PRKCQ	CD2AP	dis_mo	-0.00683496
RPS6KA1	CD2AP	dis_po	0.00525259
SH3BP1	CD2AP	dis_mo	-0.275368
UBC	CD320	dis_po	0.0347731
BCAN	CD44	dis_po	0.0541632
CAV1	CD44	dis_mo	-0.00280575
FGF2	CD44	dis_mo	-0.0276014
HBEGF	CD44	dis_po	0.0143483
ICAM3	CD44	dis_po	0.0240463
NAGPA	CD44	dis_mo	-0.037784
RPS6KA2	CD44	dis_mo	-0.00710487
ELAVL1	CD47	dis_mo	-0.00279822
ITGA2	CD47	dis_mo	-0.0537553
PAK1	CD47	dis_po	0.0370258
UBC	CD47	dis_mo	-0.00276818
CD19	CD72	dis_mo	-0.192555
SYK	CD72	dis_po	0.161387
CANX	CD74	dis_mo	-0.029688
CTSL1	CD74	dis_po	0.0113166
LGMN	CD74	dis_mo	-0.108459
SAR1B	CD74	dis_po	0.0110953
SH3GL2	CD74	dis_po	0.0508386
UBC	CD83	dis_po	0.10268
ATP6V1B1	CD9	dis_po	0.0234735
ELAVL1	CD9	dis_po	0.0279483
HLA-A	CD9	dis_po	0.0046624
ITGA5	CD9	dis_mo	-0.027608
SLC44A1	CD9	dis_po	0.0278439
TSPAN4	CD9	dis_po	0.0123141
UBC	CD99L2	dis_mo	-0.466394
EIF3I	CDC123	dis_po	0.33376
RPL13A	CDC123	dis_mo	-0.229309
RPL14	CDC123	dis_mo	-0.00988124
RPL8	CDC123	dis_po	0.081938
UBC	CDC123	dis_mo	-0.40541
PPP2R2D	CDC16	dis_mo	-0.0212097
RPF2	CDC16	dis_mo	-0.0278168
UBC	CDC16	dis_mo	-0.0195129
EFNB2	CDC42BPA	dis_po	0.0816069
MYO18A	CDC42BPA	dis_po	0.0244828
KAT2B	CDCA4	dis_mo	-0.0413795
PPP2R2C	CDCA4	dis_mo	-0.0111577
TRIM28	CDCA4	dis_po	0.119053
UBC	CDCA4	dis_mo	-0.0679463
FYN	CDCP1	dis_mo	-0.0530705
SERPINA5	CDCP1	dis_po	0.0934613
SERPING1	CDCP1	dis_mo	-0.192482
ST14	CDCP1	dis_po	0.0839586
UBC	CDCP1	dis_mo	-0.189303
BOC	CDH1	dis_mo	-0.0275938
CAPN1	CDH1	dis_po	0.00990559
CDH3	CDH1	dis_po	0.0784689
CTNNA1	CDH1	dis_mo	-0.0690215
EZR	CDH1	dis_mo	-0.0156098
FOXM1	CDH1	dis_mo	-0.0335821
GMNN	CDH1	dis_po	0.0443636
HSPD1	CDH1	dis_mo	-0.0224893
KLRG1	CDH1	dis_mo	-0.0703278
PKP3	CDH1	dis_po	0.0407939
TGM2	CDH1	dis_mo	-0.0125114
VCL	CDH1	dis_po	0.0176788
CDH6	CDH10	dis_mo	-0.479447
COPS6	CDH10	dis_mo	-0.0465467
CTNNA1	CDH10	dis_po	0.456129
KIFAP3	CDH10	dis_mo	-0.480691
CDH2	CDH11	dis_mo	-0.125211
CRK	CDH11	dis_po	0.131098
CTNNA1	CDH11	dis_mo	-0.0398462
CDH11	CDH2	dis_mo	-0.125211
CTNNA1	CDH2	dis_po	0.00749522
KIFAP3	CDH2	dis_po	0.116729
KPNA2	CDH2	dis_mo	-0.0233252
MTHFD1	CDH2	dis_mo	-0.00661199
PKP3	CDH2	dis_po	0.0208013
PRKCDBP	CDH2	dis_mo	-0.0131277
PTPN6	CDH2	dis_po	0.0146133
AP2M1	CDH3	dis_po	0.105985
CD2AP	CDH3	dis_mo	-0.253651
CDH1	CDH3	dis_po	0.0784689
CDH7	CDH3	dis_mo	-0.198932
CTNNA1	CDH3	dis_mo	-0.228711
DSC2	CDH3	dis_po	0.0388727
PKP3	CDH3	dis_po	0.0361791
UBC	CDH3	dis_mo	-0.0178329
CDH10	CDH6	dis_mo	-0.479447
CDH7	CDH6	dis_mo	-0.0334843
CTNNA1	CDH6	dis_mo	-0.0222668
KPNA2	CDH6	dis_mo	-0.0411178
CDH3	CDH7	dis_mo	-0.198932
CDH6	CDH7	dis_mo	-0.0334843
CTNNA1	CDH7	dis_mo	-0.0419894
NUP50	CDH7	dis_po	0.119281
ELAVL1	CDK2AP1	dis_mo	-0.115252
MBD2	CDK2AP1	dis_mo	-0.00730999
MTA3	CDK2AP1	dis_mo	-0.177231
DMBT1	CDK5RAP3	dis_mo	-0.0462733
MME	CDK5RAP3	dis_mo	-0.0651078
TAX1BP3	CDK5RAP3	dis_po	0.157297
TUBG1	CDK5RAP3	dis_po	0.0285053
UBC	CDK5RAP3	dis_mo	-0.227135
BCL11A	CDK6	dis_mo	-0.0271173
CCND3	CDK6	dis_mo	-0.0167378
ELAVL1	CDK6	dis_mo	-0.0038545
FOXM1	CDK6	dis_po	0.00228426
PPM1B	CDK6	dis_po	0.00384333
SORBS1	CDK6	dis_mo	-0.0591076
SSBP2	CDK6	dis_mo	-0.0316497
TJP2	CDK6	dis_mo	-0.0178004
UCHL1	CDK6	dis_po	0.167084
UNG	CDK6	dis_mo	-0.0220312
APLP1	CDKN1A	dis_mo	-0.016705
BAD	CDKN1A	dis_mo	-0.00525851
CASP3	CDKN1A	dis_po	0.000819206
COL4A5	CDKN1A	dis_po	0.013987
CRELD2	CDKN1A	dis_mo	-0.113736
CTSB	CDKN1A	dis_po	0.0543375
DDAH2	CDKN1A	dis_mo	-0.141464
HDAC6	CDKN1A	dis_mo	-0.00915125
MCM3	CDKN1A	dis_mo	-0.017821
MCM4	CDKN1A	dis_po	0.0172763
PARP1	CDKN1A	dis_po	0.00295527
RNF144B	CDKN1A	dis_mo	-0.0934564
TXN	CDKN1A	dis_mo	-0.0766988
GMNN	CDT1	dis_mo	-0.00494042
GRWD1	CDT1	dis_mo	-0.0270492
KAT2B	CDT1	dis_mo	-0.030436
MCM3	CDT1	dis_po	0.0373266
MCM4	CDT1	dis_po	0.0191083
MYLK	CDT1	dis_po	0.0116697
ORC1L	CDT1	dis_po	0.105089
ACSS2	CDYL	dis_po	0.471148
UBC	CDYL	dis_mo	-0.167157
ERBB2	CEACAM1	dis_mo	-0.0219663
PXN	CEACAM1	dis_po	0.0157211
DDIT3	CEBPD	dis_po	0.0112498
UBC	CEBPD	dis_mo	-0.0183718
BRIX1	CEBPZ	dis_mo	-0.0138516
DHX15	CEBPZ	dis_mo	-0.0106903
LAG3	CEBPZ	dis_mo	-0.0296059
MRTO4	CEBPZ	dis_mo	-0.0134217
RPL13A	CEBPZ	dis_mo	-0.00276702
SDAD1	CEBPZ	dis_po	0.0774165
UBC	CEBPZ	dis_mo	-0.0319813
WDR12	CEBPZ	dis_mo	-0.00300578
HLA-DMA	CENTA1	dis_po	0.0677198
PARD6A	CENTA1	dis_mo	-0.0768267
PARD6G	CENTA1	dis_mo	-0.00281774
RHOB	CENTA1	dis_po	0.0929065
STAT6	CENTA1	dis_mo	-0.134297
PRKCH	CEP290	dis_mo	-0.00287285
SSNA1	CEP290	dis_mo	-0.0625786
BMP2	CER1	dis_mo	-0.0337264
FKBP1A	CGN	dis_mo	-0.158452
UBC	CGN	dis_mo	-0.0355472
APP	CHAC2	dis_mo	-0.0791569
UBC	CHAC2	dis_po	0.0848657
APP	CHAF1B	dis_mo	-0.0125436
FA2H	CHAF1B	dis_mo	-0.00687286
SMARCA5	CHAF1B	dis_mo	-0.00359276
SUCLG1	CHAF1B	dis_mo	-0.0146255
UBC	CHAF1B	dis_mo	-0.0248155
SIRT1	CHCHD2	dis_mo	-0.0147763
SAMM50	CHCHD3	dis_mo	-0.0107167
HADHB	CHCHD4	dis_mo	-0.0817501
RHBDD2	CHCHD4	dis_po	0.24097
TIMM10	CHCHD4	dis_mo	-0.05071
TIMM9	CHCHD4	dis_mo	-0.0791079
TOMM40	CHCHD4	dis_mo	-0.022713
GPS2	CHD3	dis_mo	-0.0401327
IVNS1ABP	CHD3	dis_mo	-0.0288726
MBD2	CHD3	dis_mo	-0.0275028
MTA3	CHD3	dis_mo	-0.0156984
MYB	CHD3	dis_mo	-0.00467292
PRPF40A	CHD3	dis_mo	-0.0179347
SDCCAG3	CHD3	dis_po	0.0138632
SKIL	CHD3	dis_po	0.0137494
SLC27A6	CHD3	dis_mo	-0.157197
SOX2	CHD3	dis_mo	-0.0216619
CBX4	CHD7	dis_po	0.602575
PARP1	CHD7	dis_mo	-0.779282
PBRM1	CHD7	dis_mo	-0.0356184
SOX2	CHD7	dis_po	0.367985
UBC	CHD7	dis_mo	-0.125816
OTX1	CHIC2	dis_po	0.0526724
ELAVL1	CHPT1	dis_mo	-0.142299
UBC	CHPT1	dis_po	0.142445
UBC	CHRNA9	dis_po	0.10913
BCAN	CHST12	dis_mo	-0.0202193
VCAN	CHST12	dis_mo	-0.0408893
BCAN	CHST13	dis_mo	-0.2534
UBC	CHST15	dis_mo	-0.624344
DCPS	CHST4	dis_mo	-0.106667
BCAN	CHSY1	dis_mo	-0.0434366
DSCC1	CHTF8	dis_mo	-0.0534687
EIF4EBP1	CHTF8	dis_po	0.0112724
PRR14	CHTF8	dis_po	0.130559
UBC	CHTF8	dis_po	0.0493694
NRIP1	CIB1	dis_mo	-0.0375327
UBC	CIB1	dis_mo	-0.00546919
APP	CINP	dis_mo	-0.0476864
APP	CIRH1A	dis_po	0.00878611
IMP4	CIRH1A	dis_mo	-0.000549344
MAK16	CIRH1A	dis_po	0.00615404
NLE1	CIRH1A	dis_po	0.0213846
NOP56	CIRH1A	dis_mo	-0.00408652
NOP58	CIRH1A	dis_mo	-0.0330071
PRNP	CIRH1A	dis_po	0.0082531
RBM19	CIRH1A	dis_po	0.0571717
WDR46	CIRH1A	dis_mo	-0.0186494
UBC	CISD1	dis_mo	-0.037047
SMAD3	CITED2	dis_mo	-0.00784348
CSE1L	CKB	dis_po	0.0115092
FOXO3	CKB	dis_po	0.00292835
NANS	CKB	dis_mo	-0.302375
PFAS	CKB	dis_po	0.0118181
SLC9A3R1	CKB	dis_po	0.00783653
TGM2	CKB	dis_mo	-0.0245152
CALM1	CKMT1B	dis_po	0.346192
SLC25A5	CKMT1B	dis_mo	-0.0875362
UBC	CKMT1B	dis_mo	-0.0482661
CLDN5	CLDN1	dis_mo	-0.056496
TSPAN3	CLDN11	dis_mo	-0.0329599
TSPAN4	CLDN11	dis_mo	-0.0334444
UBC	CLDN3	dis_mo	-0.173558
CLDN1	CLDN5	dis_mo	-0.056496
UBC	CLDN7	dis_mo	-0.00528802
BCAP29	CLGN	dis_mo	-0.0116409
GPM6A	CLGN	dis_po	0.00137695
UBC	CLGN	dis_po	0.0730245
HNRNPA1	CLIC4	dis_mo	-0.0405582
UBC	CLIC4	dis_po	0.0376893
APITD1	CLIP1	dis_po	0.0150208
BUB1	CLIP1	dis_mo	-0.0269989
BUB1B	CLIP1	dis_mo	-0.00685913
BUB3	CLIP1	dis_po	0.010195
CALM1	CLIP1	dis_po	0.0249828
MLF1IP	CLIP1	dis_po	0.0495374
PAFAH1B1	CLIP1	dis_mo	-0.0428848
RANGAP1	CLIP1	dis_mo	-0.00538677
RCC2	CLIP1	dis_mo	-0.0277616
TUBA4A	CLIP1	dis_po	0.0179516
UBC	CLIP1	dis_mo	-0.0279058
ZWILCH	CLIP1	dis_mo	-0.0459274
RRP15	CLN8	dis_po	0.0243872
RTN4	CLN8	dis_mo	-0.0148468
TMEM14A	CLN8	dis_po	0.0432326
ATG5	CMPK1	dis_mo	-0.0176155
MRPL2	CMPK1	dis_mo	-0.0114747
RPS15	CMPK1	dis_po	0.161295
UBC	CMPK1	dis_po	0.0220104
HSPD1	CNIH4	dis_mo	-0.134645
PSMD14	CNIH4	dis_po	0.0436893
SAR1B	CNIH4	dis_mo	-0.00330611
TMED2	CNIH4	dis_po	0.0337198
TMEM30B	CNIH4	dis_mo	-0.00767831
IQGAP2	CNN1	dis_mo	-0.0193664
TPM3	CNN1	dis_mo	-0.0904989
APP	CNPY2	dis_mo	-0.0120057
DDIT3	CNPY2	dis_po	0.117715
MYLIP	CNPY2	dis_po	0.0175798
PINX1	CNPY2	dis_mo	-0.00808543
UBC	CNPY2	dis_mo	-0.0480595
APPBP2	CNTFR	dis_mo	-0.347317
CRK	CNTFR	dis_mo	-0.156243
CSF2	CNTFR	dis_po	0.0406458
FYN	CNTFR	dis_mo	-0.00684477
NECAB2	CNTFR	dis_mo	-0.168641
PLSCR1	CNTFR	dis_mo	-0.0626672
BCAR1	CNTN1	dis_mo	-0.0136543
CNTN2	CNTN1	dis_mo	-0.150682
FYN	CNTN1	dis_po	0.109961
KIT	CNTN1	dis_mo	-0.069452
PDGFRB	CNTN1	dis_mo	-0.142776
CNTN1	CNTN2	dis_mo	-0.150682
CNTNAP2	CNTN2	dis_mo	-0.0861598
EFNB1	CNTN2	dis_po	0.0129964
EFNB2	CNTN2	dis_mo	-0.00815394
HDAC6	CNTN2	dis_po	0.00659073
KAT2B	CNTN2	dis_po	0.0453121
PDGFRB	CNTN2	dis_mo	-0.0238806
SRF	CNTN2	dis_po	0.0157907
TUBG1	CNTN2	dis_mo	-0.00180019
CRK	CNTNAP1	dis_po	0.104078
FYN	CNTNAP1	dis_po	0.411658
CNTN2	CNTNAP2	dis_mo	-0.0861598
EPB41L3	CNTNAP2	dis_po	0.150171
SERPINA5	CNTNAP2	dis_mo	-0.304421
ENO2	COASY	dis_po	0.0102221
GLRX3	COASY	dis_mo	-0.0454094
EPB41L3	COBL	dis_mo	-0.319926
PAK6	COBL	dis_mo	-0.106923
RGS7	COBL	dis_mo	-0.0846257
SH3GL2	COBL	dis_mo	-0.675018
STAT6	COBL	dis_po	0.0540237
TGFA	COBL	dis_mo	-0.254129
COL2A1	COL11A1	dis_po	0.0981712
COL5A2	COL11A1	dis_mo	-0.644941
SERPINA5	COL11A1	dis_po	0.0950726
UBC	COL11A1	dis_po	0.212745
ITGB1	COL13A1	dis_mo	-0.0567884
SPARC	COL13A1	dis_po	0.00383809
C12orf57	COL1A1	dis_po	0.0579988
CAPN1	COL1A1	dis_mo	-0.0307699
FSTL1	COL1A1	dis_po	0.0327235
ITGA2	COL1A1	dis_po	0.0744479
LGALS1	COL1A1	dis_po	0.014126
PAK1	COL1A1	dis_mo	-0.00142956
PDGFB	COL1A1	dis_mo	-0.0826032
PTGS1	COL1A1	dis_mo	-0.345867
SPARC	COL1A1	dis_po	0.0038793
TGFBI	COL1A1	dis_mo	-0.0463433
BMP2	COL2A1	dis_po	0.00717996
COL11A1	COL2A1	dis_po	0.0981712
HYAL1	COL2A1	dis_po	0.00348469
MAG	COL2A1	dis_mo	-0.0106108
CDKN1A	COL4A5	dis_po	0.013987
DAZAP2	COL4A5	dis_mo	-0.0445531
MMP9	COL4A5	dis_po	0.0566992
FBLN2	COL4A6	dis_po	0.0279883
MMP9	COL4A6	dis_po	0.0779713
CCL2	COL5A2	dis_mo	-0.0110137
COL11A1	COL5A2	dis_mo	-0.644941
CTGF	COL5A2	dis_po	0.0124145
PCOLCE	COL5A2	dis_po	0.0101181
STC2	COL5A2	dis_mo	-0.00816562
TNFAIP6	COL5A2	dis_mo	-0.251899
APP	COLEC12	dis_mo	-0.194013
COMMD7	COMMD1	dis_mo	-0.401485
HSPA4	COMMD1	dis_mo	-0.0127352
SGK1	COMMD1	dis_mo	-0.103509
SOCS1	COMMD1	dis_mo	-0.00987124
SPP1	COMMD1	dis_po	0.129245
TRAF5	COMMD3	dis_mo	-0.0831601
COMMD1	COMMD7	dis_mo	-0.401485
LITAF	COMT	dis_mo	-0.0550168
RGS2	COMT	dis_po	0.0498351
UBC	COMT	dis_mo	-0.0955727
XRN2	COMT	dis_po	0.342309
COPS6	COPS3	dis_po	0.10432
DDIT3	COPS3	dis_mo	-0.410517
GPS1	COPS3	dis_mo	-0.0447761
HSP90AA1	COPS3	dis_mo	-0.0884582
SOX2	COPS3	dis_po	0.00558856
UBC	COPS3	dis_po	0.107078
ATP9A	COPS6	dis_mo	-0.0897468
CCNA2	COPS6	dis_po	0.0803645
CDH10	COPS6	dis_mo	-0.0465467
COPS3	COPS6	dis_po	0.10432
FBXO22	COPS6	dis_po	0.0296989
FOXI1	COPS6	dis_mo	-0.174563
GPS1	COPS6	dis_mo	-0.0447324
KLHL9	COPS6	dis_po	0.00317836
SORL1	COPS6	dis_po	0.0198996
TRIB3	COPS6	dis_mo	-0.0261855
UCHL3	COPS6	dis_mo	-0.0589981
USP7	COPS6	dis_mo	-0.000905755
ZEB2	COPS6	dis_mo	-0.0524849
TBL1X	CORO2A	dis_po	0.18427
ACTA1	COTL1	dis_mo	-0.0815945
ELAVL1	COTL1	dis_po	0.19373
PINX1	COTL1	dis_mo	-0.0323974
RPS15A	COTL1	dis_mo	-0.00842334
UBC	COTL1	dis_po	0.0107422
HSP90AA1	COX10	dis_po	0.00962552
ISYNA1	COX10	dis_mo	-0.0755531
ODC1	COX10	dis_po	0.0429812
SRR	COX10	dis_po	0.0185388
SUCLG1	COX10	dis_po	0.0232421
XRCC6BP1	COX10	dis_mo	-0.0419364
FAM86A	COX11	dis_mo	-0.18215
SCO1	COX11	dis_po	0.127411
SQSTM1	COX11	dis_po	0.0896046
UBC	COX11	dis_mo	-0.116048
HADHB	COX17	dis_mo	-0.0111766
SCO1	COX17	dis_mo	-0.145451
COX5B	COX5A	dis_po	0.0797851
UBC	COX5A	dis_mo	-0.146962
COX5A	COX5B	dis_po	0.0797851
PRMT5	COX5B	dis_mo	-0.0152428
UBC	COX5B	dis_po	0.0168619
C12orf44	CPNE7	dis_mo	-0.0832882
ARRB1	CPNE8	dis_mo	-0.0292065
C9orf169	CPNE8	dis_po	0.132461
ELAVL1	CPNE8	dis_mo	-0.0284628
UBC	CPNE8	dis_mo	-0.042771
CPT1A	CPS1	dis_mo	-0.0229031
LRPPRC	CPS1	dis_mo	-0.0294278
SIRT5	CPS1	dis_po	0.125311
CPS1	CPT1A	dis_mo	-0.0229031
CYBA	CPT1A	dis_po	0.324952
UBC	CPT1A	dis_mo	-0.53905
POLR2I	CPT2	dis_po	0.136121
APPBP2	CRABP2	dis_po	0.224422
CCND3	CRABP2	dis_po	0.0496226
UBC	CRABP2	dis_mo	-0.186705
MPP5	CRB3	dis_po	0.0404361
CDKN1A	CRELD2	dis_mo	-0.113736
GADD45A	CRELD2	dis_po	0.0564482
UBC	CRELD2	dis_mo	-0.201642
AP2M1	CRK	dis_po	0.0085264
ASAP2	CRK	dis_mo	-0.00672333
ASAP3	CRK	dis_po	0.307872
CDH11	CRK	dis_po	0.131098
CNTFR	CRK	dis_mo	-0.156243
CNTNAP1	CRK	dis_po	0.104078
DPPA4	CRK	dis_mo	-0.0839173
EFS	CRK	dis_po	0.0572519
EPHA1	CRK	dis_mo	-0.0126951
EPHB2	CRK	dis_po	0.0506123
ERBB3	CRK	dis_po	0.000800554
HSPBP1	CRK	dis_mo	-0.0423147
ID4	CRK	dis_po	0.0124131
MICAL1	CRK	dis_mo	-0.166621
NEDD9	CRK	dis_po	0.0244908
PIK3CD	CRK	dis_mo	-0.00467337
PIP5K2A	CRK	dis_po	0.0643954
PPFIBP2	CRK	dis_po	0.173998
PTPN4	CRK	dis_mo	-0.0783622
PXN	CRK	dis_mo	-0.0171108
RAPGEF1	CRK	dis_po	0.0165608
RGS20	CRK	dis_mo	-0.0736657
RGS7	CRK	dis_po	0.00383518
SH3BP1	CRK	dis_mo	-0.124296
SHANK3	CRK	dis_mo	-0.00932143
HLA-A	CRLF3	dis_po	0.0029559
ICAM3	CRLF3	dis_mo	-0.0092107
LYN	CRLF3	dis_po	0.0185489
NCBP2	CROP	dis_mo	-0.014494
HSPB1	CRYGD	dis_po	0.0639956
HSPB8	CRYGD	dis_mo	-0.0994419
METTL11A	CRYZL1	dis_mo	-0.151359
ANXA1	CSAD	dis_po	0.0272087
ABCF1	CSDA	dis_po	0.0906207
ADRM1	CSDA	dis_po	0.065726
EIF5B	CSDA	dis_po	0.0132004
ELAVL1	CSDA	dis_po	0.00172133
TFAP2C	CSDA	dis_po	0.0440774
AMFR	CSE1L	dis_mo	-0.0172652
ATG5	CSE1L	dis_po	0.0100793
BCAR3	CSE1L	dis_mo	-0.00184336
C12orf44	CSE1L	dis_mo	-0.000503585
CKB	CSE1L	dis_po	0.0115092
GYS1	CSE1L	dis_po	0.0120129
NRIP1	CSE1L	dis_po	0.0118575
PSME1	CSE1L	dis_mo	-0.00117815
SGK	CSE1L	dis_mo	-0.0106288
UBC	CSE1L	dis_mo	-0.00216289
CNTFR	CSF2	dis_po	0.0406458
CSF3R	CSF2	dis_mo	-0.029397
EPOR	CSF2	dis_po	0.128622
HNRNPA1	CSF2	dis_mo	-0.0116773
PIK3CB	CSF2	dis_mo	-0.0660623
PIK3CD	CSF2	dis_po	0.0679465
SHC1	CSF2	dis_po	0.0226926
CSF2	CSF3R	dis_mo	-0.029397
JAK1	CSF3R	dis_po	0.0449475
LYN	CSF3R	dis_po	0.100128
SHC1	CSF3R	dis_mo	-0.0401248
SOCS3	CSF3R	dis_mo	-0.00397236
SYK	CSF3R	dis_mo	-0.294331
WSB1	CSF3R	dis_mo	-0.0318195
CBS	CSNK1D	dis_po	0.00716651
HSP90AA1	CSNK1D	dis_po	0.0691584
PAFAH1B1	CSNK1D	dis_po	0.00858667
RPS24	CSNK1D	dis_po	0.00957098
SIRT1	CSNK1D	dis_mo	-0.00533959
TUBG1	CSNK1D	dis_mo	-0.0118186
ABCA1	CSNK2A2	dis_po	0.00977848
AUTS2	CSNK2A2	dis_mo	-0.0667309
C18orf25	CSNK2A2	dis_mo	-0.0200864
CCDC59	CSNK2A2	dis_po	0.0240574
CCDC86	CSNK2A2	dis_po	0.0192561
EIF3M	CSNK2A2	dis_mo	-0.0067893
FBRS	CSNK2A2	dis_mo	-0.0181346
GLI3	CSNK2A2	dis_po	0.00500359
JAZF1	CSNK2A2	dis_po	0.0916583
NOLC1	CSNK2A2	dis_mo	-0.00652028
PIP4K2A	CSNK2A2	dis_mo	-0.0106564
PPP1R1B	CSNK2A2	dis_mo	-0.030018
RPL36AL	CSNK2A2	dis_po	0.0834928
SULF2	CSNK2A2	dis_mo	-0.0863249
SURF6	CSNK2A2	dis_mo	-0.0336313
ZNF219	CSNK2A2	dis_po	0.1712
ACTN4	CSRP1	dis_mo	-0.0497823
EEF1A2	CSRP1	dis_mo	-0.155172
SPTBN1	CSRP1	dis_mo	-0.162505
UBC	CSRP1	dis_mo	-0.0170074
CAPN1	CSTB	dis_po	0.0565357
CTSB	CSTB	dis_mo	-0.0589139
CTSH	CSTB	dis_mo	-0.00620045
CTSL1	CSTB	dis_po	0.0470191
PINX1	CSTB	dis_mo	-0.0130105
SQSTM1	CSTB	dis_po	0.0265834
EFTUD2	CSTF1	dis_mo	-0.0291478
ELAVL1	CSTF1	dis_mo	-0.00515913
PHF5A	CSTF1	dis_po	0.123933
POLR2F	CSTF1	dis_mo	-0.0132556
POLR2J	CSTF1	dis_mo	-0.000964874
SNRPF	CSTF1	dis_po	0.0330399
TXNL4A	CSTF1	dis_po	0.011801
MBP	CTDSP1	dis_mo	-0.171626
ELAVL1	CTDSPL	dis_po	0.459568
UBC	CTDSPL	dis_mo	-0.215595
CCL2	CTGF	dis_po	0.10147
COL5A2	CTGF	dis_po	0.0124145
ELAVL1	CTGF	dis_mo	-0.00248277
FSTL1	CTGF	dis_po	0.00370907
IGFBP4	CTGF	dis_mo	-0.0129888
ITGA5	CTGF	dis_mo	-0.000327484
LAMB1	CTGF	dis_po	0.00530992
LRP11	CTGF	dis_mo	-0.0487625
SLC2A2	CTGF	dis_po	0.0659706
STC2	CTGF	dis_po	0.345583
THBS2	CTGF	dis_mo	-0.0326864
TNFAIP6	CTGF	dis_po	0.0224216
UBC	CTGF	dis_mo	-0.00246868
ATG5	CTH	dis_mo	-0.00485064
GARS	CTH	dis_mo	-0.0102837
PYGL	CTH	dis_po	0.0639196
SNRNP200	CTH	dis_po	0.00858978
CDH1	CTNNA1	dis_mo	-0.0690215
CDH10	CTNNA1	dis_po	0.456129
CDH11	CTNNA1	dis_mo	-0.0398462
CDH2	CTNNA1	dis_po	0.00749522
CDH3	CTNNA1	dis_mo	-0.228711
CDH6	CTNNA1	dis_mo	-0.0222668
CDH7	CTNNA1	dis_mo	-0.0419894
DSC2	CTNNA1	dis_mo	-0.0113943
DSG2	CTNNA1	dis_mo	-0.00077427
FAM84B	CTNNA1	dis_po	0.0676729
GARS	CTNNA1	dis_mo	-0.00256484
JUB	CTNNA1	dis_po	0.0712898
LEF1	CTNNA1	dis_po	0.116932
TJP2	CTNNA1	dis_mo	-7.02611e-05
EIF3B	CTSA	dis_po	0.0817613
GSR	CTSA	dis_po	0.00806944
OAT	CTSA	dis_po	0.0603155
CDKN1A	CTSB	dis_po	0.0543375
CSTB	CTSB	dis_mo	-0.0589139
EIF3M	CTSB	dis_mo	-0.0137834
MARCKS	CTSB	dis_mo	-0.0487832
RGS2	CTSB	dis_mo	-0.00402754
S100A10	CTSB	dis_mo	-0.00881778
APPBP2	CTSC	dis_po	0.147951
ARIH1	CTSC	dis_mo	-0.0482511
CAPN1	CTSC	dis_mo	-0.103942
CTSL1	CTSC	dis_mo	-0.0522551
UBC	CTSC	dis_po	0.06344
CSTB	CTSH	dis_mo	-0.00620045
UBC	CTSH	dis_mo	-0.0215816
VCAM1	CTSH	dis_po	0.0605748
CD74	CTSL1	dis_po	0.0113166
CSTB	CTSL1	dis_po	0.0470191
CTSC	CTSL1	dis_mo	-0.0522551
IGFBP3	CTSL1	dis_po	0.137216
PLAU	CTSL1	dis_po	0.0435526
RXRA	CTSL1	dis_mo	-0.0904387
UBC	CTSL1	dis_po	0.0355185
ATP1A1	CTSL2	dis_mo	-0.0595173
PROS1	CTSL2	dis_po	0.148407
SERPINB4	CTSL2	dis_mo	-0.191541
UBC	CTSL2	dis_po	0.0944818
ACTA1	CTTN	dis_po	0.0191633
ARRB1	CTTN	dis_po	0.0245514
DAB2	CTTN	dis_po	0.00645103
ERBB3	CTTN	dis_po	0.0058385
KIAA0664	CTTN	dis_po	0.537902
PTPRE	CTTN	dis_po	0.0117185
SDHAF2	CTTN	dis_mo	-0.213414
UBC	CTTN	dis_mo	-0.00679937
ANXA1	CXCL12	dis_po	0.0485276
DAZAP2	CXCL12	dis_po	0.000151446
EDNRB	CXCL12	dis_mo	-0.0434558
LPAR1	CXCL12	dis_mo	-0.0027771
CXCR4	CXCL14	dis_po	0.00769992
C5	CXCL5	dis_po	0.0200889
CXCL6	CXCL5	dis_mo	-0.0645151
CXCR4	CXCL5	dis_mo	-0.0882058
FSTL1	CXCL5	dis_mo	-0.0212728
GABBR2	CXCL5	dis_mo	-0.0158984
HLA-DMA	CXCL5	dis_po	0.00488837
HTR2C	CXCL5	dis_po	0.012989
NMU	CXCL5	dis_po	0.0142712
SPARC	CXCL5	dis_mo	-0.01952
TNFAIP6	CXCL5	dis_mo	-0.0205848
ADORA2B	CXCL6	dis_mo	-0.0157285
CXCL5	CXCL6	dis_mo	-0.0645151
GABBR2	CXCL6	dis_mo	-0.0114815
C5	CXCR4	dis_mo	-0.013448
CAV1	CXCR4	dis_mo	-0.00283726
CXCL14	CXCR4	dis_po	0.00769992
CXCL5	CXCR4	dis_mo	-0.0882058
GNA12	CXCR4	dis_po	0.0221724
HSPA8	CXCR4	dis_mo	-0.0136807
SSTR1	CXCR4	dis_po	0.0249149
UBC	CXCR7	dis_po	0.499655
UBC	CYB561	dis_po	0.505208
ACSL1	CYB5A	dis_mo	-0.239414
[truncated: 22,598 more rows]
