# Supplementary material for: Dynamic Network-Based Relevance Score Reveals Essential Proteins and Functional Modules in Directed Differentiation
Source: Stem Cells Int. 2015 Apr 21;2015:792843. doi: 10.1155/2015/792843 (PMC4419265; doi:10.1155/2015/792843)
Supplement: Supplementary file 1 — The supplementary materials contain the whole interaction difference networks from LSB stage to LSB/S/F8 stage and from LSB/S/F8 stage to LSB/S/F8/CHIR stage (docx file) and the tables used in Cytoscape to visualize the interaction difference networks (xlsx files). [file 792843.f1.zip › New folder/difference_LSBF8-LSB_node_cytoscape.xlsx]

## Sheet: 工作表2 _function
ID	status	Angiogenesis	Cytoskeletal regulation by Rho GTPase	EGF receptor signaling pathway	FGF signaling pathway	Gonadotropin releasing hormone receptor pathway	Huntington disease	Integrin signalling pathway	Parkinson disease	PDGF signaling pathway	Ras Pathway	TGF-beta signaling pathway	VEGF signaling pathway	function	shh	wnt
ABCA2	dis_node													0
ABHD5	dis_node													0
ACAA1	dis_node													0
ACOT9	dis_node													0
ACP6	dis_node													0
ACSL1	dis_node													0
ACSM3	dis_node													0
ACSS2	dis_node													0
ACTA2	dis_node		1				1							2		1
ACTN4	dis_node							1						1
ADA	dis_node													0
ADAMTS8	dis_node													0
ADAMTS9	dis_node													0
ADSSL1	dis_node													0		1
AEBP2	dis_node													0
AGPAT5	dis_node													0
AGPS	dis_node													0
AHCY	dis_node													0
AKIRIN2	dis_node													0
AKR1A1	dis_node													0
ALDH1A1	dis_node													0
ALDH1B1	dis_node													0
ALDH2	dis_node													0
ALDH5A1	dis_node													0
ALPK2	dis_node													0
AMFR	dis_node													0
AMPH	dis_node													0
ANG	dis_node													0
ANKRD1	dis_node													0
ANKRD11	dis_node													0
ANKRD46	dis_node													0
ANLN	dis_node													0
ANTXR1	dis_node													0
ANXA4	dis_node													0
AOX1	dis_node													0
APPBP2	dis_node													0
APPL2	dis_node													0
ARHGAP15	dis_node									1				1
ARHGAP4	dis_node									1				1
ARHGEF17	dis_node													0
ARHGEF3	dis_node		1											1
ARHGEF4	dis_node													0
ARID5B	dis_node													0
ARIH1	dis_node													0
ARL4C	dis_node						1							1
ARL5A	dis_node													0
ARL5B	dis_node													0
ARL6	dis_node													0
ARNT2	dis_node													0
ARRDC4	dis_node													0
ARTN	dis_node													0
ASAP1	dis_node													0
ASAP2	dis_node													0
ASAP3	dis_node													0
ATG5	dis_node													0
ATL1	dis_node													0
ATL3	dis_node													0
ATP11C	dis_node													0
ATP1A1	dis_node													0
ATP1A2	dis_node													0
ATP5F1	dis_node													0
ATP6V0B	dis_node													0
ATP6V1H	dis_node													0
ATXN2	dis_node													0
AUTS2	dis_node													0
AVL9	dis_node													0
B2M	dis_node													0
BACH2	dis_node													0
BAIAP2L1	dis_node													0
BAK1	dis_node													0
BCAN	dis_node													0
BCAP29	dis_node													0
BCKDK	dis_node													0
BCL2L13	dis_node													0
BCL3	dis_node													0
BCL6B	dis_node													0
BCL9	dis_node													0		1
BFAR	dis_node													0
BFSP1	dis_node													0
BMI1	dis_node													0
BMP2	dis_node					1						1		2
BMP4	dis_node					1						1		2
BNC2	dis_node													0
BOC	dis_node													0
BRP44L	dis_node													0
BST2	dis_node													0
BTF3	dis_node													0
BTN3A2	dis_node													0
C10orf114	dis_node													0
C12orf35	dis_node													0
C12orf44	dis_node													0
C12orf52	dis_node													0
C12orf57	dis_node													0
C16orf53	dis_node													0
C18orf21	dis_node													0
C18orf25	dis_node													0
C1QTNF5	dis_node													0
C1orf31	dis_node													0
C21orf33	dis_node													0
C22orf13	dis_node													0
C2orf56	dis_node													0
C3orf37	dis_node													0
C3orf52	dis_node													0
C4orf14	dis_node													0
C5	dis_node													0
C6orf192	dis_node													0
C7orf41	dis_node													0
C9orf169	dis_node													0
CA4	dis_node													0
CABLES1	dis_node													0
CALM1	dis_node													0
CANX	dis_node													0
CAP2	dis_node													0
CAPG	dis_node													0
CAPN1	dis_node						1							1
CAPSL	dis_node													0
CARHSP1	dis_node													0
CBLB	dis_node			1										1
CBLC	dis_node			1										1
CBX4	dis_node													0
CCDC50	dis_node													0
CCDC86	dis_node													0
CCDC92	dis_node													0
CCNA1	dis_node													0
CCNB1IP1	dis_node													0
CCND3	dis_node													0
CCNK	dis_node													0
CCRL1	dis_node													0
CD151	dis_node													0
CD19	dis_node													0
CD320	dis_node													0
CD72	dis_node													0
CD99L2	dis_node													0
CDCP1	dis_node													0
CDH10	dis_node													0		1
CDH11	dis_node													0		1
CDH3	dis_node													0		1
CDH6	dis_node													0		1
CDH7	dis_node													0		1
CDK6	dis_node													0
CEP290	dis_node													0
CHAC2	dis_node													0
CHCHD2	dis_node													0
CHCHD4	dis_node													0
CHD3	dis_node													0
CHD7	dis_node													0
CHPT1	dis_node													0
CHST12	dis_node													0
CHST4	dis_node													0
CHTF8	dis_node													0
CKMT1B	dis_node													0
CLDN11	dis_node													0
CLGN	dis_node													0
CLIC4	dis_node													0
CLIP1	dis_node													0
CNIH4	dis_node													0
CNPY2	dis_node													0
CNTFR	dis_node													0
CNTN1	dis_node													0
CNTN2	dis_node													0
CNTNAP1	dis_node													0
CNTNAP2	dis_node											1		1
COLEC12	dis_node													0
COMMD1	dis_node													0
COMMD7	dis_node													0
COPS3	dis_node													0
COTL1	dis_node													0
COX10	dis_node													0
COX11	dis_node													0
COX17	dis_node													0
COX5A	dis_node													0
COX5B	dis_node													0
CPNE7	dis_node													0
CPNE8	dis_node													0
CPS1	dis_node													0
CPT2	dis_node													0
CRABP2	dis_node													0
CRB3	dis_node													0
CRK	dis_node	1						1						2
CROP	dis_node													0
CRYGD	dis_node													0
CRYZL1	dis_node													0
CSF2	dis_node													0
CSF3R	dis_node													0
CSNK1D	dis_node								1					1		1
CSNK2A2	dis_node								1					1		1
CSTB	dis_node													0
CSTF1	dis_node													0
CTNNA1	dis_node													0		1
CTSH	dis_node													0
CTSL1	dis_node													0
CTSL2	dis_node													0
CXCL14	dis_node													0
CXCR7	dis_node													0
CYB561	dis_node													0
CYBA	dis_node													0
CYFIP2	dis_node						1							1
CYP4X1	dis_node													0
DAB2	dis_node													0
DCUN1D4	dis_node													0
DDAH1	dis_node													0
DDAH2	dis_node													0
DDIT3	dis_node													0
DDT	dis_node													0
DDX19B	dis_node													0
DDX25	dis_node													0
DDX49	dis_node													0
DEDD2	dis_node													0
DEGS1	dis_node													0
DENND5B	dis_node													0
DEPDC7	dis_node													0
DERA	dis_node													0
DFFA	dis_node													0
DHX32	dis_node													0
DIXDC1	dis_node	1												1		1
DMBT1	dis_node													0
DNAJC12	dis_node													0
DNASE2	dis_node													0
DNPEP	dis_node													0
DPM1	dis_node													0
DRAP1	dis_node													0
DRD4	dis_node													0
DSC2	dis_node													0
DSE	dis_node													0
DSG2	dis_node													0
DTX2	dis_node													0
DUSP14	dis_node													0
DYDC1	dis_node													0
DYRK2	dis_node													0
DYSF	dis_node													0
EARS2	dis_node													0
EBF3	dis_node													0
EDIL3	dis_node													0
EEF1A2	dis_node													0
EEF1B2	dis_node													0
EFNB2	dis_node	1												1
EFR3A	dis_node													0
EI24	dis_node													0
EIF2B2	dis_node													0
EIF3CL	dis_node													0
EIF3I	dis_node													0
EIF3M	dis_node													0
EIF4A1	dis_node													0
EIF4E2	dis_node													0
ELF2	dis_node									1				1
ELF3	dis_node									1				1
EML1	dis_node													0
EMP3	dis_node													0
EMX2	dis_node													0
ENAH	dis_node		1											1
ENG	dis_node													0
ENO2	dis_node													0
EPHA2	dis_node													0
EPOR	dis_node													0
EPS8L1	dis_node													0
ERF	dis_node									1				1
ESPN	dis_node													0
ETS2	dis_node													0
ETV1	dis_node													0
EYA3	dis_node													0
F2RL1	dis_node													0
FAAH	dis_node													0
FAIM	dis_node													0
FAM101B	dis_node													0
FAM110A	dis_node													0
FAM116B	dis_node													0
FAM129B	dis_node													0
FAM174B	dis_node													0
FAM3C	dis_node													0
FAM65A	dis_node													0
FAM84B	dis_node													0
FAT1	dis_node													0		1
FBLN2	dis_node													0
FBRS	dis_node													0
FBXO22	dis_node													0
FBXO27	dis_node													0
FBXO45	dis_node													0
FBXW4	dis_node													0
FBXW8	dis_node													0
FGF16	dis_node				1									1
FGF9	dis_node				1									1
FKBP1A	dis_node											1		1
FLNB	dis_node							1						1
FLYWCH1	dis_node													0
FOS	dis_node	1				1	1			1				4
FOSL1	dis_node											1		1
FOXA3	dis_node													0
FOXI1	dis_node													0
FOXO3	dis_node													0
FOXO4	dis_node													0
FOXP4	dis_node													0
FST	dis_node					1								1
FSTL1	dis_node													0
FTSJ1	dis_node													0
FTSJ3	dis_node													0
FUT8	dis_node													0
FXYD5	dis_node													0
GAB2	dis_node			1						1				2
GADD45A	dis_node													0
GAMT	dis_node													0
GAS1	dis_node													0
GATC	dis_node													0
GCH1	dis_node													0
GDPD1	dis_node													0
GEMIN6	dis_node													0
GFRA3	dis_node													0
GHSR	dis_node													0
GK	dis_node													0
GLI3	dis_node													0	1
GLIS3	dis_node													0
GLOD4	dis_node													0
GMIP	dis_node													0
GMPPB	dis_node													0
GNA13	dis_node													0
GNG8	dis_node													0		1
GNS	dis_node													0
GPC4	dis_node													0
GPD1L	dis_node													0
GPN3	dis_node													0
GPR19	dis_node													0
GPS1	dis_node													0
GPS2	dis_node													0
GRIN2D	dis_node						1							1
GRM4	dis_node													0
GSR	dis_node													0
GSTO1	dis_node													0
GTPBP10	dis_node													0
GYG1	dis_node													0
GYPC	dis_node													0
GYS1	dis_node													0
HADHB	dis_node													0
HAX1	dis_node													0
HBEGF	dis_node			1										1
HERC2	dis_node													0
HERPUD1	dis_node													0
HES1	dis_node													0
HES2	dis_node													0
HESX1	dis_node													0
HEYL	dis_node													0
HIATL1	dis_node													0
HIC2	dis_node													0
HIST1H2BH	dis_node													0
HK2	dis_node													0
HLA-A	dis_node													0
HLA-DMA	dis_node													0
HLA-G	dis_node													0
HMGN2	dis_node													0
HMHA1	dis_node													0
HNMT	dis_node													0
HNRPDL	dis_node													0
HOOK1	dis_node													0
HPDL	dis_node													0
HPN	dis_node													0
HRK	dis_node													0
HSD17B14	dis_node													0
HSPB2	dis_node	1											1	2
HTR2C	dis_node													0
HYAL1	dis_node													0
HYLS1	dis_node													0
IARS2	dis_node													0
IBTK	dis_node													0
ID2	dis_node					1								1
ID4	dis_node													0
IDS	dis_node													0
IER5L	dis_node													0
IFITM1	dis_node													0
IFITM2	dis_node													0
IFNGR1	dis_node													0
IGSF1	dis_node													0
IGSF21	dis_node													0
IKBIP	dis_node													0
IL13RA1	dis_node													0
IL1A	dis_node													0
IL1RAPL1	dis_node													0
IMP4	dis_node													0
IRF6	dis_node													0
IRF7	dis_node													0
IRS1	dis_node					1								1
ISG15	dis_node													0
ISG20L2	dis_node													0
ISOC1	dis_node													0
ISYNA1	dis_node													0
ITGA2	dis_node							1						1
ITGA5	dis_node							1						1
ITPKB	dis_node													0
IVNS1ABP	dis_node													0
JARID2	dis_node													0
JAZF1	dis_node													0
JMJD1C	dis_node													0
JPH1	dis_node													0
JUB	dis_node													0
KARS	dis_node													0
KATNA1	dis_node													0
KCNK13	dis_node													0
KCNK5	dis_node													0
KCTD12	dis_node													0
KCTD8	dis_node													0
KDELR3	dis_node													0
KIAA0182	dis_node													0
KIAA0363	dis_node													0
KIAA1274	dis_node													0
KIDINS220	dis_node													0
KIF1A	dis_node													0
KIF3C	dis_node													0
KIFC2	dis_node													0
KLF11	dis_node													0
KLF13	dis_node													0
KLHL9	dis_node													0
KLK3	dis_node													0
KLRG1	dis_node													0
LACTB	dis_node													0
LAG3	dis_node													0
LAMP2	dis_node													0
LCMT2	dis_node													0
LDB3	dis_node													0
LDHD	dis_node													0
LDOC1	dis_node													0
LEF1	dis_node													0		1
LETM1	dis_node													0
LGALS8	dis_node													0
LGMN	dis_node													0
LHX5	dis_node													0
LINGO1	dis_node													0
LIPA	dis_node													0
LITAF	dis_node													0
LMX1A	dis_node													0
LPAR1	dis_node													0
LPCAT3	dis_node													0
LPHN1	dis_node													0
LRAT	dis_node													0
LRP11	dis_node													0
LRPPRC	dis_node													0
LRRC45	dis_node													0
LRRFIP2	dis_node													0
LRTOMT	dis_node													0
LSG1	dis_node													0
LSM7	dis_node													0
LY6E	dis_node													0
LYPLA1	dis_node													0
MAP3K1	dis_node	1		1	1	1		1			1			6
MAP3K12	dis_node					1								1
MAPK4	dis_node													0
2013-03-03	dis_node													0
MARCKS	dis_node													0
MATK	dis_node													0
MB	dis_node													0
MBD2	dis_node													0
MBNL2	dis_node													0
MBP	dis_node													0
MDH1	dis_node													0
ME1	dis_node													0
METTL11A	dis_node													0
METTL13	dis_node													0
MFGE8	dis_node													0
MFSD3	dis_node													0
MICA	dis_node													0
MICAL1	dis_node							1						1
MID1	dis_node													0
MID1IP1	dis_node													0
MLEC	dis_node													0
MLKL	dis_node													0
MLST8	dis_node													0
MMP11	dis_node													0
MMP15	dis_node													0
MPP5	dis_node													0
MRPL19	dis_node													0
MRPS2	dis_node													0
MRPS22	dis_node													0
MRPS24	dis_node													0
MRRF	dis_node													0
MSC	dis_node													0
MSRB2	dis_node													0
MSRB3	dis_node													0
MST4	dis_node													0
MSX1	dis_node													0
MT1A	dis_node													0
MT1E	dis_node													0
MTA1	dis_node													0
MTHFS	dis_node													0
MTX2	dis_node													0
MUM1	dis_node													0
MYADM	dis_node													0
MYLIP	dis_node													0
MYLK	dis_node		1											1
MYO18A	dis_node													0
MYO1E	dis_node													0
MYO3B	dis_node		1											1
MYO5C	dis_node													0
Magmas	dis_node													0
NACC2	dis_node													0
NAGPA	dis_node													0
NCBP1	dis_node													0
NCLN	dis_node													0
NCOA6	dis_node													0
NCOR2	dis_node						1							1
NDUFA4	dis_node													0
NDUFA9	dis_node													0
NDUFB7	dis_node													0
NDUFS8	dis_node													0
NECAB2	dis_node													0
NEO1	dis_node													0
NEURL1B	dis_node													0
NINJ1	dis_node													0
NLE1	dis_node													0
NLGN1	dis_node													0
NME4	dis_node													0
NME5	dis_node													0
NMU	dis_node													0
NOS2	dis_node	1				1							1	3
NOS2A	dis_node													0
NOTCH3	dis_node	1												1
NOXO1	dis_node													0
NPM3	dis_node													0
NPTX1	dis_node													0
NR2E1	dis_node													0
NR2E3	dis_node													0
NR2F1	dis_node													0
NR2F2	dis_node													0
NR2F6	dis_node													0
NRD1	dis_node													0
NRG1	dis_node													0
NRIP1	dis_node													0
NSMCE1	dis_node													0
NSMCE4A	dis_node													0
NT5DC2	dis_node													0
NTN1	dis_node													0
NUAK2	dis_node													0
NUP62CL	dis_node													0
OAS3	dis_node													0
OGDHL	dis_node													0
OLFM2	dis_node													0
OLFML2A	dis_node													0
OLFML3	dis_node													0
ORM2	dis_node													0
OTX1	dis_node					1								1
PABPC3	dis_node													0
PACSIN2	dis_node													0
PAFAH1B1	dis_node													0
PAK6	dis_node		1											1
PAM	dis_node													0
PANK2	dis_node													0
PANK3	dis_node													0
PARD6G	dis_node													0
PARP14	dis_node													0
PAX6	dis_node													0
PBRM1	dis_node													0
PCDH7	dis_node													0		1
PCK2	dis_node													0
PDCD10	dis_node													0
PDE4D	dis_node													0
PDE5A	dis_node													0
PDGFD	dis_node	1												1
PDIA4	dis_node													0
PDK3	dis_node													0
PDSS1	dis_node													0
PDXDC1	dis_node													0
PDYN	dis_node													0
PDZD2	dis_node													0
PELI2	dis_node													0
PFKFB2	dis_node													0
PGD	dis_node													0
PHF15	dis_node													0
PIAS1	dis_node													0
PIK3CB	dis_node	1		1	1			1		1	1		1	7
PIM1	dis_node													0
PIP5K2A	dis_node													0
PIPSL	dis_node													0
PKP3	dis_node													0
PLA2G7	dis_node													0
PLAC9	dis_node													0
PLCB2	dis_node													0		1
PLCG2	dis_node	1		1	1					1			1	5
PLEKHA1	dis_node													0
PLEKHA4	dis_node													0
PLEKHF1	dis_node													0
PLEKHO2	dis_node													0
PLSCR1	dis_node													0
PLXNA1	dis_node													0
PLXNB1	dis_node													0
PLXNB2	dis_node													0
PMEPA1	dis_node													0
PNO1	dis_node													0
PODXL	dis_node													0
POFUT2	dis_node													0
POLR1D	dis_node													0
POLR2G	dis_node													0
PON1	dis_node													0
POU3F1	dis_node													0
POU3F2	dis_node													0
PPA1	dis_node													0
PPARD	dis_node													0		1
PPP1R14A	dis_node													0
PPP1R15A	dis_node													0
PPP1R3B	dis_node													0
PPP2R2C	dis_node				1									1
PPP2R2D	dis_node				1									1
PRDM16	dis_node													0
PRDX3	dis_node													0
PRDX5	dis_node													0
PREB	dis_node													0
PREP	dis_node													0
PRKAG2	dis_node					1								1
PRKCA	dis_node	1		1	1	1				1			1	6		1
PRKCB1	dis_node													0
PRKCH	dis_node	1		1	1								1	4		1
PRKD1	dis_node	1		1									1	3
PRKX	dis_node													0
PRMT2	dis_node													0
PRMT5	dis_node													0
PRODH	dis_node						1							1
PRPF40A	dis_node													0
PRR14	dis_node													0
PRR3	dis_node													0
PRRG1	dis_node													0
PRSS8	dis_node													0
PSMA6	dis_node								1					1
PSMB2	dis_node													0
PSMC3	dis_node													0
PSMD1	dis_node													0
PSMD14	dis_node													0
PSMD6	dis_node													0
PSMD8	dis_node													0
PSMG4	dis_node													0
PTAR1	dis_node													0
PTCHD2	dis_node													0
PTGES3	dis_node													0
PTGS1	dis_node													0
PTMS	dis_node													0
PTPN13	dis_node													0
PTPN4	dis_node													0
PTPRE	dis_node													0
PTPRM	dis_node													0
PTRH1	dis_node													0
PTRH2	dis_node													0
PUSL1	dis_node													0
PVALB	dis_node													0
PXN	dis_node	1				1		1					1	4
PYCR2	dis_node													0
R3HCC1	dis_node													0
RAB11FIP1	dis_node													0
RAB15	dis_node													0
RAB24	dis_node													0
RAB25	dis_node						1			1				2
RAB38	dis_node													0
RAB3B	dis_node													0
RAB3IP	dis_node													0
RABGAP1	dis_node													0
RAC2	dis_node		1	1	1		1	1			1			6
RALGPS1	dis_node	1		1	1			1		1	1			6
RAP1GAP	dis_node													0
RAPGEF5	dis_node													0
RARB	dis_node													0
RASAL2	dis_node			1										1
RASD2	dis_node													0
RASGRF2	dis_node													0
RASGRP2	dis_node													0
RAVER1	dis_node													0
RAX	dis_node													0
RBM19	dis_node													0
RBM24	dis_node													0
RBM43	dis_node													0
RBM47	dis_node													0
RBM9	dis_node													0
RBMS1	dis_node													0
RBP1	dis_node													0
RCOR2	dis_node													0
RDH11	dis_node													0
REEP5	dis_node													0
RELN	dis_node													0
REPS2	dis_node													0
RET	dis_node													0
RFX1	dis_node													0
RFX3	dis_node													0
RGMA	dis_node													0
RHBDD2	dis_node													0
RHOB	dis_node	1	1					1		1	1			5
RHOG	dis_node			1			1							2
RIMS4	dis_node													0
RIOK3	dis_node													0
RN7SK	dis_node													0
RNASE4	dis_node													0
RNASEH2C	dis_node													0
RND2	dis_node							1						1
RNF135	dis_node													0
RNF167	dis_node													0
ROBO1	dis_node													0
RPE	dis_node													0
RPL13A	dis_node													0
RPL14	dis_node													0
RPL36AL	dis_node													0
RPL38	dis_node													0
RPN1	dis_node													0
RPS15A	dis_node													0
RRP7A	dis_node													0
RTN4	dis_node													0
RTN4IP1	dis_node													0
RXRA	dis_node													0
S100A11	dis_node													0
SAMM50	dis_node													0
SARS	dis_node													0
SC5DL	dis_node													0
SCARB1	dis_node													0
SCARF2	dis_node													0
SDC2	dis_node													0
SDHB	dis_node													0
SDHC	dis_node													0
SDHD	dis_node													0
SDSL	dis_node													0
SEC14L4	dis_node													0
SEC24D	dis_node													0
SEC61B	dis_node													0
SELS	dis_node													0
SEMA3A	dis_node													0
SEMA4B	dis_node													0
2013-09-06	dis_node													0
SERPINA5	dis_node													0
SERPINB1	dis_node													0
SERPINB6	dis_node													0
SERPING1	dis_node													0
SERPINI1	dis_node													0
SERTAD4	dis_node													0
SH2D3A	dis_node													0
SH2D3C	dis_node													0
SH3BP1	dis_node													0
SH3GL2	dis_node													0
SH3YL1	dis_node													0
SHQ1	dis_node													0
SIGIRR	dis_node													0
SIPA1L2	dis_node													0
SLC16A5	dis_node													0
SLC1A3	dis_node													0
SLC1A5	dis_node													0
SLC25A1	dis_node													0
SLC25A12	dis_node													0
SLC25A21	dis_node													0
SLC25A43	dis_node													0
SLC25A5	dis_node													0
SLC27A6	dis_node													0
SLC2A2	dis_node													0
SLC2A8	dis_node													0
SLC44A1	dis_node													0
SLC44A2	dis_node													0
SLC6A15	dis_node													0
SLC6A8	dis_node													0
SLC7A10	dis_node													0
SLC7A2	dis_node													0
SMAP1	dis_node													0
SMARCA5	dis_node													0		1
SMTN	dis_node													0
SNCB	dis_node								1					1
SNRPF	dis_node													0
SOCS3	dis_node													0
SOCS7	dis_node													0
SORL1	dis_node													0
SOX13	dis_node													0
SOX2	dis_node													0
SOX4	dis_node													0
SOX6	dis_node													0
SP8	dis_node						1							1
SPINK1	dis_node													0
SPINT2	dis_node													0
SPOCK1	dis_node													0
SPTBN1	dis_node													0
SRF	dis_node					1				1	1			3
SRP19	dis_node													0
SRR	dis_node													0
SSH2	dis_node		1											1
ST14	dis_node													0
STAMBP	dis_node													0
STAMBPL1	dis_node													0
STAR	dis_node													0
STK17B	dis_node													0
STK36	dis_node			1	1					1				3	1
STK39	dis_node													0
STMN1	dis_node		1											1
STMN4	dis_node		1											1
STX16	dis_node													0
SUCLG1	dis_node													0
SULF2	dis_node													0
SULT1A3	dis_node													0
SURF6	dis_node													0
SYN2	dis_node													0
SYNCRIP	dis_node													0
TAP2	dis_node													0		1
TAPBP	dis_node													0
TBC1D9	dis_node													0
TBCA	dis_node													0
TBL1X	dis_node													0		1
TBL2	dis_node													0
TBRG4	dis_node													0
TCEAL8	dis_node													0
TCEB3	dis_node													0
TCF7L1	dis_node					1								1		1
TCL1B	dis_node													0
TESC	dis_node													0
TFAP2C	dis_node													0
TFE3	dis_node													0
TGFA	dis_node			1										1
TGM2	dis_node													0
THBS3	dis_node													0
THBS4	dis_node													0
THUMPD2	dis_node													0
TIMM9	dis_node													0
TIMP2	dis_node													0
TIMP3	dis_node													0
TLE2	dis_node													0		1
TLE3	dis_node													0		1
TM9SF2	dis_node													0
TMED2	dis_node													0
TMEM108	dis_node													0
TMEM14A	dis_node													0
TMEM180	dis_node													0
TMEM189-UBE2V1	dis_node													0
TMEM2	dis_node													0
TMEM37	dis_node													0
TMEM63A	dis_node													0
TNFRSF10B	dis_node													0
TNFRSF21	dis_node													0
TNNT1	dis_node													0
TNRC9	dis_node													0
TOPORS	dis_node													0
TOX3	dis_node													0
TP53I11	dis_node													0
TP53RK	dis_node													0
TRAF3IP2	dis_node													0
TRAF5	dis_node													0
TRERF1	dis_node													0
TRIM22	dis_node													0
TRIM56	dis_node													0
TRIM71	dis_node													0
TRIOBP	dis_node													0
TRMT112	dis_node													0
TSC22D1	dis_node													0
TSHZ3	dis_node													0
TSPAN3	dis_node													0
TSPAN4	dis_node													0
TSPO	dis_node													0
TTC39C	dis_node													0
TXNL4A	dis_node													0
TXNRD1	dis_node													0
TXNRD2	dis_node													0
UBC	dis_node													0
UBE2F	dis_node													0
UBE2Q2	dis_node													0
UBE3B	dis_node													0
UBR7	dis_node													0
UBTD1	dis_node													0
UPF2	dis_node													0
URB2	dis_node													0
USP21	dis_node													0
USP47	dis_node													0
USP7	dis_node													0
VAMP8	dis_node													0
VANGL2	dis_node													0
VDAC3	dis_node													0
VENTX	dis_node													0
VGF	dis_node													0
VIPR1	dis_node													0
VPS13D	dis_node													0
VPS16	dis_node													0
VPS18	dis_node													0
VTN	dis_node													0
WBP11	dis_node													0
WDFY1	dis_node													0
WDR19	dis_node													0
WFIKKN1	dis_node													0
WFIKKN2	dis_node													0
XPR1	dis_node													0
XRCC6BP1	dis_node													0
XRN2	dis_node													0
YARS	dis_node													0
YIF1A	dis_node													0
ZBTB25	dis_node													0
ZCCHC12	dis_node													0
ZDHHC12	dis_node													0
ZDHHC23	dis_node													0
ZEB2	dis_node													0
ZFHX4	dis_node													0
ZFP36L1	dis_node													0
ZFYVE21	dis_node													0
ZHX2	dis_node													0
ZIC2	dis_node													0
ZMYND8	dis_node													0
ZNF165	dis_node													0
ZNF214	dis_node													0
ZNF215	dis_node													0
ZNF219	dis_node													0
ZNF250	dis_node													0
ZNF323	dis_node													0
ZNF431	dis_node													0
ZNF462	dis_node													0
ZNF503	dis_node													0
ZNF521	dis_node													0
ZNF593	dis_node													0
ZNF606	dis_node													0
ZNF627	dis_node													0
ZNF74	dis_node													0
ZNHIT6	dis_node													0
AASS	both_node													0
ABCA1	both_node													0
ABCB6	both_node													0
ABCC4	both_node													0
ABCE1	both_node													0
ABCF1	both_node													0
ACAT1	both_node													0
ACAT2	both_node													0
ACLY	both_node													0
ACO1	both_node													0
ACSL3	both_node													0
ACTA1	both_node		1				1							2		1
ACTC1	both_node		1				1							2		1
ACTG2	both_node		1				1							2		1
ACTN3	both_node													0
ACVR1	both_node											1		1
ACVR1B	both_node					1						1		2		1
ACVR2A	both_node					1						1		2
ACY1	both_node													0
ADAMTS1	both_node													0
ADAR	both_node													0
ADM	both_node													0
ADORA2B	both_node													0
ADRA2A	both_node													0
ADRM1	both_node													0
ADSL	both_node													0
ADSS	both_node													0		1
AES	both_node													0		1
AFG3L2	both_node													0
AFP	both_node													0
AHI1	both_node													0
AHNAK	both_node													0
AHSA1	both_node													0
AK2	both_node													0
AKAP1	both_node													0
AKIRIN1	both_node													0
AKR1B1	both_node													0
ALCAM	both_node													0
ALDH1A3	both_node													0
ALDOC	both_node													0
ALG3	both_node													0
AMD1	both_node													0
ANK2	both_node													0
ANXA1	both_node													0
ANXA2	both_node													0
ANXA3	both_node													0
ANXA5	both_node					1								1
AP1M2	both_node													0
AP2M1	both_node													0
APEX1	both_node													0
APH1B	both_node													0
APIP	both_node													0
APITD1	both_node													0
APLP1	both_node													0
APOA1BP	both_node													0
APOBEC3B	both_node													0
APOE	both_node													0
APP	both_node													0
APRT	both_node													0
AQR	both_node													0
ARAP3	both_node													0
ARFGEF1	both_node													0
ARFGEF2	both_node													0
ARHGAP22	both_node													0
ARHGAP23	both_node													0
ARHGAP8	both_node	1	1							1			1	4
ARHGDIA	both_node													0
ARHGDIB	both_node													0
ARHGEF5	both_node													0
ARL4A	both_node						1							1
ARPC2	both_node		1					1						2
ARPC5L	both_node		1				1	1						3
ARRB1	both_node													0		1
ASCC3	both_node													0
ASF1A	both_node													0
ASGR1	both_node													0
ASNS	both_node													0
ASS1	both_node													0
ATF3	both_node					1								1
ATF4	both_node													0
ATF5	both_node													0
ATG3	both_node													0
ATP1B1	both_node													0
ATP2A2	both_node													0
ATP2B4	both_node													0
ATP5A1	both_node													0
ATP5D	both_node													0
ATP5G1	both_node													0
ATP5H	both_node													0
ATP6V1B1	both_node													0
ATP6V1G2	both_node													0
ATP9A	both_node													0
AURKAIP1	both_node													0
AURKB	both_node													0
AVEN	both_node													0
AZIN1	both_node													0
B3GNT2	both_node													0
BAD	both_node	1								1			1	3
BAMBI	both_node											1		1
BARHL1	both_node													0
BAX	both_node						1							1
BBS1	both_node													0
BCAR1	both_node							1						1
BCAR3	both_node													0
BCCIP	both_node													0
BCL11A	both_node													0
BCL2	both_node													0
BCL2L1	both_node													0
BCL6	both_node													0
BEND3	both_node													0
BEND5	both_node													0
BID	both_node													0
BMPR1A	both_node					1						1		2		1
BNIP3L	both_node													0
BNIPL	both_node													0
BOK	both_node													0
BOP1	both_node													0
BPTF	both_node													0
BRIX1	both_node													0
BSN	both_node													0
BUB1	both_node													0
BUB1B	both_node													0
BUB3	both_node													0
C11orf51	both_node													0
C16orf48	both_node													0
C1GALT1	both_node													0
C1QBP	both_node													0
C1orf168	both_node													0
C1orf94	both_node													0
C3orf15	both_node													0
C6orf106	both_node													0
C6orf211	both_node													0
C7orf20	both_node													0
C9orf9	both_node													0
CACNB3	both_node													0
CACYBP	both_node													0
CADPS2	both_node													0
CALCA	both_node													0
CALD1	both_node													0
CALR	both_node													0
CAMKV	both_node													0
CAPN12	both_node						1							1
CARD11	both_node													0
CARS	both_node													0
CASP3	both_node						1							1
CAV1	both_node					1		1						2
CAV2	both_node													0
CBR1	both_node													0
CBS	both_node													0
CBX3	both_node													0
CCDC130	both_node													0
CCDC59	both_node													0
CCDC6	both_node													0
CCL2	both_node													0
CCL26	both_node													0
CCNA2	both_node													0
CCNC	both_node													0
CCNE1	both_node								1					1
CCT3	both_node													0
CCT6A	both_node													0
CCT7	both_node													0
CD2AP	both_node													0
CD44	both_node													0
CD47	both_node													0
CD74	both_node													0
CD83	both_node													0
CD9	both_node													0
CDC123	both_node													0
CDC16	both_node													0
CDC42BPA	both_node													0
CDCA3	both_node													0
CDCA4	both_node													0
CDCA7	both_node													0
CDCA7L	both_node													0
CDH1	both_node													0		1
CDH2	both_node													0		1
CDK2AP1	both_node													0
CDK5RAP3	both_node													0
CDKN1A	both_node													0
CDKN1C	both_node													0
CDS1	both_node													0
CDT1	both_node													0
CDYL	both_node													0
CEACAM1	both_node													0
CEBPD	both_node													0
CEBPZ	both_node													0
CELSR2	both_node													0		1
CENTA1	both_node													0
CER1	both_node													0		1
CGN	both_node													0
CHAF1B	both_node													0
CHCHD3	both_node													0
CHIC2	both_node													0
CHPF	both_node													0
CHRNA9	both_node													0
CHST13	both_node													0
CHST15	both_node													0
CHSY1	both_node													0
CIB1	both_node													0
CINP	both_node													0
CIRH1A	both_node													0
CISD1	both_node													0
CITED2	both_node											1		1
CKB	both_node													0
CLDN1	both_node													0
CLDN3	both_node													0
CLDN5	both_node													0
CLDN7	both_node													0
CLN8	both_node													0
CMPK1	both_node													0
CMTM3	both_node													0
CNN1	both_node													0
COASY	both_node													0
COBL	both_node													0
COCH	both_node													0
COL11A1	both_node							1						1
COL13A1	both_node							1						1
COL1A1	both_node							1						1
COL2A1	both_node							1						1
COL4A5	both_node							1						1
COL4A6	both_node							1						1
COL5A2	both_node							1						1
COMMD3	both_node													0
COMT	both_node													0
COPS6	both_node													0
COQ10B	both_node													0
COQ3	both_node													0
CORO2A	both_node													0
CPNE3	both_node													0
CPT1A	both_node													0
CRELD2	both_node													0
CRIP2	both_node													0
CRLF3	both_node													0
CSAD	both_node													0
CSDA	both_node					1								1
CSE1L	both_node													0
CSRP1	both_node													0
CTDSP1	both_node													0
CTDSPL	both_node													0
CTGF	both_node													0
CTH	both_node													0
CTSA	both_node													0
CTSB	both_node													0
CTSC	both_node													0
CTTN	both_node													0
CXCL12	both_node													0
CXCL5	both_node													0
CXCL6	both_node													0
CXCR4	both_node													0
CXXC5	both_node													0
CXorf26	both_node													0
CYB5A	both_node													0
CYB5R2	both_node													0
CYP2S1	both_node													0
CYP51A1	both_node													0
CYR61	both_node													0
DACH1	both_node													0
DARS2	both_node													0
DAZAP1	both_node													0
DAZAP2	both_node													0
DBC1	both_node													0
DBI	both_node													0
DCLK1	both_node													0
DCPS	both_node													0
DCX	both_node													0
DDX21	both_node													0
DDX27	both_node													0
DDX39	both_node													0
DEDD	both_node													0
DGUOK	both_node													0
DHCR7	both_node													0
DHRS3	both_node													0
DHX15	both_node													0
DHX29	both_node													0
DHX37	both_node													0
DHX58	both_node													0
DIABLO	both_node													0
DIAPH3	both_node		1											1
DIDO1	both_node													0
DIO2	both_node													0
DIS3L	both_node													0
DKC1	both_node													0
DLK1	both_node	1												1
DLL1	both_node	1												1
DNAJB6	both_node													0
DNAJC7	both_node													0
DNALI1	both_node													0
DNMT3B	both_node													0
DOCK2	both_node													0
DPH2	both_node													0
DPP3	both_node													0
DPP9	both_node													0
DPPA2	both_node													0
DPPA4	both_node													0
DPYSL3	both_node													0
DPYSL4	both_node													0
DSCC1	both_node													0
DSTN	both_node		1											1
DTNA	both_node							1						1
DUSP1	both_node					1								1
DUSP16	both_node													0
DUSP3	both_node													0
DUSP6	both_node													0
DUT	both_node													0
EBI3	both_node													0
EBNA1BP2	both_node													0
EBP	both_node													0
ECD	both_node													0
EDC4	both_node													0
EDN1	both_node													0		1
EDNRB	both_node													0
EEF1E1	both_node													0
EFEMP1	both_node													0
EFEMP2	both_node													0
EFHD1	both_node													0
EFNB1	both_node	1												1
EFNB3	both_node													0
EFS	both_node							1						1
EFTUD2	both_node													0
EGLN3	both_node													0
EHD4	both_node													0
EIF1	both_node													0
EIF1AX	both_node													0
EIF2AK2	both_node													0
EIF2C3	both_node													0
EIF3B	both_node													0
EIF4A3	both_node													0
EIF4E3	both_node													0
EIF4EBP1	both_node													0
EIF4G1	both_node													0
EIF5A	both_node													0
EIF5B	both_node													0
ELAVL1	both_node													0
ELAVL2	both_node													0
EMG1	both_node													0
ENC1	both_node													0
ENO3	both_node													0
ENOPH1	both_node													0
EPB41L2	both_node													0
EPB41L3	both_node													0
EPB41L5	both_node													0
EPCAM	both_node													0
EPHA1	both_node													0
EPHA4	both_node													0
EPHB2	both_node	1												1
ERBB2	both_node			1										1
ERBB3	both_node			1										1
ERCC6L	both_node													0
ERRFI1	both_node													0
ETFB	both_node													0
ETS1	both_node	1								1	1		1	4
ETV4	both_node													0
ETV5	both_node													0
EVL	both_node		1											1
EXOC2	both_node										1			1
EXOSC3	both_node													0
EZR	both_node													0
F11R	both_node													0
F3	both_node	1												1
FA2H	both_node													0
FABP3	both_node													0
FABP5	both_node													0
FAM124B	both_node													0
FAM129A	both_node													0
FAM169A	both_node													0
FAM46B	both_node													0
FAM64A	both_node													0
FAM86A	both_node													0
FAM98A	both_node													0
FARS2	both_node													0
FBLN1	both_node													0
FBP1	both_node													0
FBXL6	both_node													0
FBXO28	both_node													0
FDFT1	both_node													0
FEZ1	both_node													0
FGF19	both_node													0
FGF2	both_node													0
FGFR1	both_node	1			1									2
FGFR4	both_node				1									1
FHL2	both_node													0
FHOD1	both_node													0
FJX1	both_node													0
FKBP4	both_node													0
FLII	both_node													0
FLJ10374	both_node													0
FLRT3	both_node													0
FOLR1	both_node													0
FOXJ1	both_node													0
FOXK1	both_node													0
FOXM1	both_node													0
FOXO1	both_node													0
FRZB	both_node	1												1		1
FSCN1	both_node													0
FTL	both_node													0
FUS	both_node													0
FXYD1	both_node													0
FXYD6	both_node													0
FYN	both_node							1	1					2
FYTTD1	both_node													0
FZD2	both_node	1												1		1
FZD5	both_node	1												1		1
GABBR2	both_node													0
GAD1	both_node													0
GADD45G	both_node													0
GADD45GIP1	both_node													0
GAL	both_node													0
GALNT12	both_node													0
GARS	both_node													0
GART	both_node													0
GAS7	both_node													0
GCDH	both_node													0
GCLM	both_node													0
GCSH	both_node													0
GDF15	both_node											1		1
GFPT1	both_node													0
GFPT2	both_node													0
GGH	both_node													0
GLIPR2	both_node													0
GLMN	both_node													0
GLRX3	both_node													0
GLS2	both_node													0
GMNN	both_node													0
GNA12	both_node													0
GNA14	both_node													0		1
GNL2	both_node													0
GNL3	both_node													0
GOLPH3L	both_node													0
GPC3	both_node													0
GPM6A	both_node													0
GPM6B	both_node													0
GPR176	both_node													0
GPT2	both_node													0
GRB10	both_node													0
GRB14	both_node	1												1
GRB7	both_node	1												1
GRK5	both_node													0
GRM3	both_node													0
GRPR	both_node													0
GRTP1	both_node													0
GRWD1	both_node													0
GSDMB	both_node													0
GSTP1	both_node													0
GTF2E2	both_node													0
GTF3C2	both_node													0
GUF1	both_node													0
GULP1	both_node													0
H1F0	both_node													0
H2AFY	both_node													0
H2AFY2	both_node													0
HBA2	both_node													0
HDAC6	both_node													0
HELLS	both_node													0		1
HERC5	both_node													0
HERC6	both_node													0
HES4	both_node													0
HES6	both_node													0
HEY2	both_node													0
HHEX	both_node													0
HIP2	both_node													0
HK1	both_node													0
HLA-DOA	both_node													0
HMBS	both_node													0
HMGA1	both_node													0
HMGB3	both_node													0
HMGCS1	both_node													0
HMMR	both_node													0
HMOX1	both_node													0
HNRNPA1	both_node													0
HNRNPA3	both_node													0
HNRNPAB	both_node													0
HNRNPM	both_node													0
HOMER2	both_node													0
HPRT1	both_node													0
HPS5	both_node													0
HS3ST3A1	both_node													0
HS6ST2	both_node													0
HSD11B2	both_node													0
HSD17B12	both_node													0
HSD17B4	both_node													0
HSP90AA1	both_node													0
HSP90B1	both_node													0
HSPA14	both_node													0
HSPA2	both_node					1			1					2
HSPA4	both_node													0
HSPA4L	both_node													0
HSPA8	both_node					1			1					2
HSPB1	both_node	1											1	2
HSPB8	both_node													0
HSPBP1	both_node													0
HSPD1	both_node													0
HSPE1	both_node													0
ICAM2	both_node													0
ICAM3	both_node													0
ID1	both_node													0
IDH1	both_node													0
IDI1	both_node													0
IER3	both_node													0
IFI6	both_node													0
IFRD2	both_node													0
IGF2R	both_node													0
IGFBP3	both_node													0
IGFBP4	both_node													0
IGFBP5	both_node													0
IL27RA	both_node													0
IMP3	both_node													0
INF2	both_node													0
INO80D	both_node													0
INSIG1	both_node													0
IQGAP1	both_node													0
IQGAP2	both_node													0
ITGA3	both_node							1						1
ITGA6	both_node							1						1
ITGB1	both_node					1		1						2
ITGB1BP3	both_node													0
ITGB3BP	both_node													0
ITGB4BP	both_node													0
ITGB5	both_node							1						1
ITPA	both_node													0
ITPK1	both_node													0
ITPR3	both_node					1				1				2		1
JAK1	both_node	1								1				2
JAM2	both_node													0
JUN	both_node	1				1	1			1	1	1		6
KAT2B	both_node					1								1
KCND2	both_node													0
KCNG1	both_node													0
KCNG3	both_node													0
KCNK1	both_node													0
KCNK6	both_node													0
KCNQ2	both_node													0
KDR	both_node	1											1	2
KEAP1	both_node													0
KIAA0020	both_node													0
KIAA0368	both_node													0
KIAA0564	both_node													0
KIAA0664	both_node													0
KIAA1217	both_node													0
KIAA1279	both_node													0
KIAA1737	both_node													0
KIFAP3	both_node													0
KIT	both_node													0
KITLG	both_node													0
KLKB1	both_node													0
KPNA2	both_node													0
LAMA1	both_node							1						1
LAMB1	both_node							1						1
LAMC2	both_node							1						1
LAMC3	both_node							1						1
LAMP1	both_node													0
LARP1	both_node													0
LARP6	both_node													0
LCK	both_node							1	1					2
LCLAT1	both_node													0
LCP1	both_node													0
LDB2	both_node													0
LDLR	both_node													0
LEFTY1	both_node											1		1
LEFTY2	both_node											1		1
LEMD3	both_node													0
LEO1	both_node													0
LGALS1	both_node													0
LGALS3BP	both_node													0
LHX2	both_node					1								1
LHX4	both_node													0
LIMS1	both_node							1						1
LMCD1	both_node													0
LMNA	both_node													0
LMO1	both_node													0
LMO3	both_node													0
LPAR4	both_node													0
LRP2	both_node													0
LRP8	both_node													0
LRRC8D	both_node													0
LSM3	both_node													0
LSS	both_node													0
LTBP3	both_node													0
LYAR	both_node													0
LYN	both_node								1					1
MAD2L2	both_node													0
MAF	both_node													0
MAG	both_node													0
MAGED1	both_node													0
MAK16	both_node													0
MAL2	both_node													0
MAMDC2	both_node													0
MAP1LC3A	both_node													0
MAP2	both_node													0
MAP2K6	both_node			1		1					1			3
MAP4K1	both_node					1								1
MAP6	both_node													0
MAP7	both_node													0
MAPK1	both_node	1		1	1	1		1	1	1	1	1	1	10
MAPK10	both_node	1		1	1	1	1	1	1	1	1	1		10
MAPK13	both_node			1	1	1		1			1	1		6
MAPK8IP3	both_node													0
MAPRE3	both_node													0
MARS2	both_node													0
MAT2B	both_node													0
MATR3	both_node													0
MCM3	both_node													0
MCM4	both_node													0
MCM5	both_node													0
MDN1	both_node													0
MED14	both_node													0
MEGF10	both_node													0
MEIS2	both_node													0
MEST	both_node													0
METAP1	both_node													0
METTL1	both_node													0
METTL3	both_node													0
METTL7A	both_node													0
MEX3C	both_node													0
MFNG	both_node													0
MICALL1	both_node							1						1
MICB	both_node													0
MIPEP	both_node													0
MKLN1	both_node													0
MLF1IP	both_node													0
MLF2	both_node													0
MME	both_node													0
MMP25	both_node													0
MMP9	both_node													0
MNT	both_node													0
MPG	both_node													0
MPP1	both_node								1					1
MPP6	both_node													0
MPRIP	both_node													0
MRPL11	both_node													0
MRPL13	both_node													0
MRPL15	both_node													0
MRPL16	both_node													0
MRPL17	both_node													0
MRPL18	both_node													0
MRPL2	both_node													0
MRPL21	both_node													0
MRPL23	both_node													0
MRPL27	both_node													0
MRPL32	both_node													0
MRPL37	both_node													0
MRPL4	both_node													0
MRPL41	both_node													0
MRPL44	both_node													0
MRPL51	both_node													0
MRPL55	both_node													0
MRPS12	both_node													0
MRPS17	both_node													0
MRPS30	both_node													0
MRPS35	both_node													0
MRPS9	both_node													0
MRTO4	both_node													0
MSI1	both_node													0
MT1F	both_node													0
MT1X	both_node													0
MTA3	both_node													0
MTAP	both_node													0
MTHFD1	both_node													0
MTHFD1L	both_node													0
MTHFD2	both_node													0
MTIF2	both_node													0
MTO1	both_node													0
MTX1	both_node													0
MUC4	both_node													0
MX1	both_node													0
MXD4	both_node													0
MXRA7	both_node													0
MYB	both_node													0
MYL6	both_node													0
MYL9	both_node													0
MYO1D	both_node													0
MYOZ3	both_node													0
NAALAD2	both_node													0
NADSYN1	both_node													0
NANOG	both_node													0
NANS	both_node													0
NAV1	both_node													0
NCALD	both_node													0
NCAPD3	both_node													0
NCBP2	both_node													0
NCL	both_node													0
NDN	both_node													0
NDRG1	both_node													0
NDUFB9	both_node													0
NDUFV2	both_node								1					1
NEDD9	both_node													0
NEFM	both_node													0
NEU1	both_node													0
NFE2L3	both_node													0
NFIB	both_node													0
NFKBIB	both_node													0
NLN	both_node													0
NLRP12	both_node													0
NLRP2	both_node													0
NMB	both_node													0
NME1	both_node													0
NME2	both_node													0
NME3	both_node													0
NODAL	both_node											1		1
NOL11	both_node													0
NOLC1	both_node													0
NOP10	both_node													0
NOP16	both_node													0
NOP56	both_node													0
NOP58	both_node													0
NPFFR2	both_node													0
NPW	both_node													0
NQO1	both_node													0
NQO2	both_node													0
NR5A2	both_node					1								1
NRCAM	both_node													0
NRP1	both_node													0
NRP2	both_node													0
NRXN2	both_node													0
NSBP1	both_node													0
NSD1	both_node													0
NSUN2	both_node													0
NSUN5	both_node													0
NTAN1	both_node													0
NTF3	both_node													0
NTM	both_node													0
NTS	both_node													0
NUAK1	both_node													0
NUDT5	both_node													0
NUDT9	both_node													0
NUP107	both_node													0
NUP205	both_node													0
NUP50	both_node													0
NUP88	both_node													0
OAT	both_node													0
OBSL1	both_node													0
ODC1	both_node													0
OIP5	both_node													0
ORC1L	both_node													0
ORM1	both_node													0
OSBPL10	both_node													0
OSBPL6	both_node													0
OSTF1	both_node													0
OTX2	both_node													0
P2RY1	both_node													0
PA2G4	both_node													0
PACSIN1	both_node						1							1
PACSIN3	both_node													0
PAK1	both_node	1	1								1			3
PAK1IP1	both_node													0
PALLD	both_node													0
PAPLN	both_node													0
PAPSS2	both_node													0
PARD6A	both_node													0
PARP1	both_node													0
PARP12	both_node													0
PARVA	both_node							1						1
PCBD1	both_node													0
PCGF2	both_node													0
PCOLCE	both_node													0
PCSK9	both_node													0
PCYT2	both_node													0
PDCL3	both_node													0
PDE4B	both_node													0
PDE6D	both_node													0
PDGFB	both_node	1								1				2
PDGFC	both_node	1												1
PDGFRB	both_node	1												1
PDLIM1	both_node													0
PDLIM5	both_node													0
PDLIM7	both_node													0
PELP1	both_node													0
PFAS	both_node													0
PFKP	both_node													0
PFN1	both_node		1											1
PGAM1	both_node													0
PGAM4	both_node													0
PGAM5	both_node													0
PGM1	both_node													0
PGRMC1	both_node													0
PHAX	both_node													0
PHB	both_node													0
PHC1	both_node													0
PHC2	both_node													0
PHF10	both_node													0
PHF5A	both_node													0
PHLDA1	both_node													0
PHLDA3	both_node													0
PIAS2	both_node													0
PIK3CD	both_node	1		1	1			1		1	1		1	7
PIM2	both_node													0
PINX1	both_node													0
PIP4K2A	both_node													0
PITPNB	both_node													0
PKM2	both_node													0
PKMYT1	both_node													0
PKP2	both_node													0
PLA2G3	both_node													0
PLA2G4C	both_node	1				1								2
PLAGL1	both_node													0
PLAU	both_node													0
PLD3	both_node													0
PLOD2	both_node													0
PLS1	both_node													0
PLS3	both_node													0
PMAIP1	both_node													0
PMM2	both_node													0
PMP22	both_node													0
PNMA2	both_node													0
POLE2	both_node													0
POLR2F	both_node													0
POLR2H	both_node													0
POLR2I	both_node													0
POLR2J	both_node													0
POLR2L	both_node													0
POLR3G	both_node													0
POLR3K	both_node													0
POR	both_node													0
POU5F1	both_node													0
PPAN	both_node													0
PPAP2A	both_node													0
PPAP2B	both_node													0
PPAT	both_node													0
PPFIBP2	both_node													0
PPIC	both_node													0
PPIL1	both_node													0
PPL	both_node													0
PPM1B	both_node													0
PPM1G	both_node													0
PPP1R1B	both_node													0
PPP2R1B	both_node				1									1
PPP2R2B	both_node				1									1
PPP2R5A	both_node			1	1									2		1
PPPDE1	both_node													0
PQLC1	both_node													0
PRCP	both_node													0
PRDX1	both_node													0
PRELID1	both_node													0
PRKCDBP	both_node													0
PRKCQ	both_node	1		1	1	1							1	5		1
PRNP	both_node													0
PROCR	both_node													0
PROK2	both_node													0
PROS1	both_node													0
PRSS23	both_node													0
PRTFDC1	both_node													0
PSAT1	both_node													0
PSMA1	both_node								1					1
PSMA2	both_node								1					1
PSMA5	both_node								1					1
PSMB10	both_node								1					1
PSMB3	both_node								1					1
PSMB5	both_node													0
PSMB8	both_node													0
PSMB9	both_node													0
PSMC4	both_node													0
PSMD12	both_node													0
PSMD4	both_node													0
PSME1	both_node													0
PSME4	both_node													0
PSMG1	both_node													0
PSPC1	both_node													0
PSRC1	both_node													0
PTGES2	both_node													0
PTGFRN	both_node													0
PTPLA	both_node													0
PTPN6	both_node	1			1									2
PUS1	both_node													0
PWP1	both_node													0
PYCARD	both_node													0
PYGL	both_node													0
RAB17	both_node													0
RAB22A	both_node													0
RAB2A	both_node													0
RAB31	both_node													0
RAB34	both_node													0
RAB9A	both_node													0
RABGAP1L	both_node													0
RABGGTB	both_node													0
RAGE	both_node													0
RAI1	both_node													0
RAI14	both_node													0
RALB	both_node										1			1
RALGDS	both_node										1			1
RAN	both_node													0
RANBP1	both_node													0
RANGAP1	both_node													0
RAPGEF1	both_node							1						1
RARA	both_node													0
RARRES2	both_node													0
RASIP1	both_node													0
RASL12	both_node													0
RBM3	both_node													0
RBPJ	both_node	1												1
RBPMS	both_node													0
RCC2	both_node													0
REXO2	both_node													0
RGL1	both_node										1			1
RGMB	both_node													0
RGS16	both_node													0
RGS17	both_node													0
RGS2	both_node													0
RGS20	both_node													0
RGS7	both_node													0
RHBDL3	both_node													0
RHEB	both_node											1		1
RHOBTB3	both_node													0
RHOC	both_node	1	1					1			1			4
RHOQ	both_node			1			1							2
RHOU	both_node		1											1
RIN2	both_node													0
RIT2	both_node	1		1	1			1		1	1	1	1	8
RND3	both_node							1						1
RNF138	both_node													0
RNF144B	both_node													0
ROR1	both_node													0
ROR2	both_node													0
RORA	both_node													0
RPF2	both_node													0
RPL13	both_node													0
RPL29	both_node													0
RPL34	both_node													0
RPL36A	both_node													0
RPL37	both_node													0
RPL6	both_node													0
RPL8	both_node													0
RPS15	both_node													0
RPS21	both_node													0
RPS23	both_node													0
RPS24	both_node													0
RPS26	both_node													0
RPS6KA1	both_node									1	1			2
RPS6KA2	both_node									1	1			2
RPS7	both_node													0
RRAS	both_node			1				1				1		3
RRAS2	both_node			1								1		2
RRBP1	both_node													0
RRM2B	both_node													0
RRP15	both_node													0
RRS1	both_node													0
RSU1	both_node													0
RTCD1	both_node													0
RUNX1T1	both_node													0
RUVBL1	both_node													0
RUVBL2	both_node													0
S100A10	both_node													0
S100A4	both_node													0
S100A6	both_node													0
SALL1	both_node													0
SAPS1	both_node													0
SAR1B	both_node													0
SC4MOL	both_node													0
SCD	both_node													0
SCNN1A	both_node													0
SCNN1G	both_node													0
SCO1	both_node													0
SDAD1	both_node													0
SDCCAG3	both_node													0
SDF2L1	both_node													0
SDHA	both_node													0
SDHAF2	both_node													0
SEC11C	both_node													0
SEL1L3	both_node													0
SEMA5B	both_node													0
SEMA6A	both_node													0
SEMG1	both_node													0
SEPHS1	both_node													0
2013-09-03	both_node													0
SERINC1	both_node													0
SERPINB4	both_node													0
SERPINB9	both_node													0
SERPINE1	both_node													0
SERPINE2	both_node													0
SERTAD2	both_node													0
SESN1	both_node													0
SF3B4	both_node													0
SFRP1	both_node	1												1		1
SFRP2	both_node													0		1
SFRS1	both_node													0
SFRS2	both_node													0
SFXN2	both_node													0
SGK	both_node													0
SGK1	both_node													0
SGK3	both_node													0
SH2B3	both_node													0
SH3GL3	both_node						1							1
SHANK3	both_node													0
SHC1	both_node	1		1	1			1		1	1			6
SHMT2	both_node													0
SIGMAR1	both_node													0
SIL1	both_node													0
SIRT1	both_node													0
SIRT5	both_node													0
SIVA	both_node													0
SIX3	both_node													0
SIX6	both_node													0
SKIL	both_node					1						1		2
SLC25A19	both_node													0
SLC25A4	both_node													0
SLC39A6	both_node													0
SLC3A2	both_node													0
SLC4A11	both_node													0
SLC7A1	both_node													0
SLC7A3	both_node													0
SLC7A5	both_node													0
SLC9A3R1	both_node													0
SLIT2	both_node													0
SLTM	both_node													0
SMAD3	both_node					1						1		2
SMAD7	both_node											1		1
SMAP2	both_node													0
SMARCA2	both_node													0		1
SMPDL3B	both_node													0
SMS	both_node													0
SNAP23	both_node													0
SNRNP200	both_node													0
SNRPA1	both_node													0
SNRPN	both_node					1								1
SNTB1	both_node													0
SNX5	both_node													0
SNX8	both_node													0
SOCS1	both_node													0
SOCS2	both_node													0
SOD1	both_node													0
SOD2	both_node													0
SORBS1	both_node													0
SORBS2	both_node													0
SOX3	both_node													0
SOX5	both_node													0
SOX8	both_node													0
SP110	both_node													0
SPARC	both_node													0
SPHK2	both_node	1											1	2
SPINT1	both_node													0
SPON1	both_node													0
SPP1	both_node													0
SPRY1	both_node			1	1									2
SPRY2	both_node			1	1									2
SQLE	both_node													0
SQSTM1	both_node													0
SRGAP3	both_node									1				1
SRI	both_node													0
SRM	both_node													0
SRP68	both_node													0
SRPX	both_node													0
SS18	both_node													0
SSBP1	both_node													0
SSBP2	both_node													0
SSNA1	both_node													0
SSSCA1	both_node													0
SSTR1	both_node													0
ST6GAL1	both_node													0
ST7	both_node													0
STAT1	both_node	1		1						1	1			4
STAT6	both_node			1						1				2
STC2	both_node													0
STEAP3	both_node													0
STK40	both_node													0
STMN2	both_node													0
STOM	both_node													0
STRA13	both_node													0
STRN	both_node													0
SUCLA2	both_node													0
SUSD2	both_node													0
SYK	both_node													0
SYP	both_node													0
SYT1	both_node													0
SYT11	both_node													0
SYT6	both_node													0
TACSTD1	both_node													0
TAGLN	both_node													0
TAGLN2	both_node													0
TAGLN3	both_node													0
TALDO1	both_node													0
TAP1	both_node													0
TARS	both_node													0
TAX1BP3	both_node													0
TBC1D4	both_node													0
TC2N	both_node													0
TCEA2	both_node													0
TCEB2	both_node													0
TCF12	both_node													0
TCP1	both_node													0
TDGF1	both_node													0
TEK	both_node	1												1
TERF1	both_node													0
TFPI2	both_node													0
TFRC	both_node													0
TGFB1I1	both_node	1				1		1					1	4
TGFBI	both_node													0
TGFBR2	both_node					1						1		2
TGIF1	both_node					1								1
THBS1	both_node													0
THBS2	both_node													0
THY1	both_node													0
TIMM10	both_node													0
TIMM23	both_node													0
TIMM44	both_node													0
TIMP4	both_node													0
TJP2	both_node													0
TKT	both_node													0
TLE4	both_node													0		1
TMEM177	both_node													0
TMEM30B	both_node													0
TMEM64	both_node													0
TMPRSS2	both_node													0
TMX1	both_node													0
[truncated: 1,197 more rows]

## Sheet: 工作表2
ID	status	first	second	third	forth	fifth	sixth
ABCA2	dis_node
ABHD5	dis_node
ACAA1	dis_node
ACOT9	dis_node
ACP6	dis_node
ACSL1	dis_node
ACSM3	dis_node
ACSS2	dis_node
ACTA2	dis_node			huntington	cytoskeleton
ACTN4	dis_node	integrin
ADA	dis_node
ADAMTS8	dis_node
ADAMTS9	dis_node
ADSSL1	dis_node
AEBP2	dis_node
AGPAT5	dis_node
AGPS	dis_node
AHCY	dis_node
AKIRIN2	dis_node
AKR1A1	dis_node
ALDH1A1	dis_node
ALDH1B1	dis_node
ALDH2	dis_node
ALDH5A1	dis_node
ALPK2	dis_node
AMFR	dis_node
AMPH	dis_node
ANG	dis_node
ANKRD1	dis_node
ANKRD11	dis_node
ANKRD46	dis_node
ANLN	dis_node
ANTXR1	dis_node
ANXA4	dis_node
AOX1	dis_node
APPBP2	dis_node
APPL2	dis_node
ARHGAP15	dis_node
ARHGAP4	dis_node
ARHGEF17	dis_node
ARHGEF3	dis_node				cytoskeleton
ARHGEF4	dis_node
ARID5B	dis_node
ARIH1	dis_node
ARL4C	dis_node			huntington
ARL5A	dis_node
ARL5B	dis_node
ARL6	dis_node
ARNT2	dis_node
ARRDC4	dis_node
ARTN	dis_node
ASAP1	dis_node
ASAP2	dis_node
ASAP3	dis_node
ATG5	dis_node
ATL1	dis_node
ATL3	dis_node
ATP11C	dis_node
ATP1A1	dis_node
ATP1A2	dis_node
ATP5F1	dis_node
ATP6V0B	dis_node
ATP6V1H	dis_node
ATXN2	dis_node
AUTS2	dis_node
AVL9	dis_node
B2M	dis_node
BACH2	dis_node
BAIAP2L1	dis_node
BAK1	dis_node
BCAN	dis_node
BCAP29	dis_node
BCKDK	dis_node
BCL2L13	dis_node
BCL3	dis_node
BCL6B	dis_node
BCL9	dis_node
BFAR	dis_node
BFSP1	dis_node
BMI1	dis_node
BMP2	dis_node
BMP4	dis_node
BNC2	dis_node
BOC	dis_node
BRP44L	dis_node
BST2	dis_node
BTF3	dis_node
BTN3A2	dis_node
C10orf114	dis_node
C12orf35	dis_node
C12orf44	dis_node
C12orf52	dis_node
C12orf57	dis_node
C16orf53	dis_node
C18orf21	dis_node
C18orf25	dis_node
C1QTNF5	dis_node
C1orf31	dis_node
C21orf33	dis_node
C22orf13	dis_node
C2orf56	dis_node
C3orf37	dis_node
C3orf52	dis_node
C4orf14	dis_node
C5	dis_node
C6orf192	dis_node
C7orf41	dis_node
C9orf169	dis_node
CA4	dis_node
CABLES1	dis_node
CALM1	dis_node
CANX	dis_node
CAP2	dis_node
CAPG	dis_node
CAPN1	dis_node			huntington
CAPSL	dis_node
CARHSP1	dis_node
CBLB	dis_node					egf
CBLC	dis_node					egf
CBX4	dis_node
CCDC50	dis_node
CCDC86	dis_node
CCDC92	dis_node
CCNA1	dis_node
CCNB1IP1	dis_node
CCND3	dis_node
CCNK	dis_node
CCRL1	dis_node
CD151	dis_node
CD19	dis_node
CD320	dis_node
CD72	dis_node
CD99L2	dis_node
CDCP1	dis_node
CDH10	dis_node
CDH11	dis_node
CDH3	dis_node
CDH6	dis_node
CDH7	dis_node
CDK6	dis_node
CEP290	dis_node
CHAC2	dis_node
CHCHD2	dis_node
CHCHD4	dis_node
CHD3	dis_node
CHD7	dis_node
CHPT1	dis_node
CHST12	dis_node
CHST4	dis_node
CHTF8	dis_node
CKMT1B	dis_node
CLDN11	dis_node
CLGN	dis_node
CLIC4	dis_node
CLIP1	dis_node
CNIH4	dis_node
CNPY2	dis_node
CNTFR	dis_node
CNTN1	dis_node
CNTN2	dis_node
CNTNAP1	dis_node
CNTNAP2	dis_node
COLEC12	dis_node
COMMD1	dis_node
COMMD7	dis_node
COPS3	dis_node
COTL1	dis_node
COX10	dis_node
COX11	dis_node
COX17	dis_node
COX5A	dis_node
COX5B	dis_node
CPNE7	dis_node
CPNE8	dis_node
CPS1	dis_node
CPT2	dis_node
CRABP2	dis_node
CRB3	dis_node
CRK	dis_node	integrin	angio
CROP	dis_node
CRYGD	dis_node
CRYZL1	dis_node
CSF2	dis_node
CSF3R	dis_node
CSNK1D	dis_node
CSNK2A2	dis_node
CSTB	dis_node
CSTF1	dis_node
CTNNA1	dis_node
CTSH	dis_node
CTSL1	dis_node
CTSL2	dis_node
CXCL14	dis_node
CXCR7	dis_node
CYB561	dis_node
CYBA	dis_node
CYFIP2	dis_node			huntington
CYP4X1	dis_node
DAB2	dis_node
DCUN1D4	dis_node
DDAH1	dis_node
DDAH2	dis_node
DDIT3	dis_node
DDT	dis_node
DDX19B	dis_node
DDX25	dis_node
DDX49	dis_node
DEDD2	dis_node
DEGS1	dis_node
DENND5B	dis_node
DEPDC7	dis_node
DERA	dis_node
DFFA	dis_node
DHX32	dis_node
DIXDC1	dis_node		angio
DMBT1	dis_node
DNAJC12	dis_node
DNASE2	dis_node
DNPEP	dis_node
DPM1	dis_node
DRAP1	dis_node
DRD4	dis_node
DSC2	dis_node
DSE	dis_node
DSG2	dis_node
DTX2	dis_node
DUSP14	dis_node
DYDC1	dis_node
DYRK2	dis_node
DYSF	dis_node
EARS2	dis_node
EBF3	dis_node
EDIL3	dis_node
EEF1A2	dis_node
EEF1B2	dis_node
EFNB2	dis_node		angio
EFR3A	dis_node
EI24	dis_node
EIF2B2	dis_node
EIF3CL	dis_node
EIF3I	dis_node
EIF3M	dis_node
EIF4A1	dis_node
EIF4E2	dis_node
ELF2	dis_node
ELF3	dis_node
EML1	dis_node
EMP3	dis_node
EMX2	dis_node
ENAH	dis_node				cytoskeleton
ENG	dis_node
ENO2	dis_node
EPHA2	dis_node
EPOR	dis_node
EPS8L1	dis_node
ERF	dis_node
ESPN	dis_node
ETS2	dis_node
ETV1	dis_node
EYA3	dis_node
F2RL1	dis_node
FAAH	dis_node
FAIM	dis_node
FAM101B	dis_node
FAM110A	dis_node
FAM116B	dis_node
FAM129B	dis_node
FAM174B	dis_node
FAM3C	dis_node
FAM65A	dis_node
FAM84B	dis_node
FAT1	dis_node
FBLN2	dis_node
FBRS	dis_node
FBXO22	dis_node
FBXO27	dis_node
FBXO45	dis_node
FBXW4	dis_node
FBXW8	dis_node
FGF16	dis_node						fgf
FGF9	dis_node						fgf
FKBP1A	dis_node
FLNB	dis_node	integrin
FLYWCH1	dis_node
FOS	dis_node		angio	huntington
FOSL1	dis_node
FOXA3	dis_node
FOXI1	dis_node
FOXO3	dis_node
FOXO4	dis_node
FOXP4	dis_node
FST	dis_node
FSTL1	dis_node
FTSJ1	dis_node
FTSJ3	dis_node
FUT8	dis_node
FXYD5	dis_node
GAB2	dis_node					egf
GADD45A	dis_node
GAMT	dis_node
GAS1	dis_node
GATC	dis_node
GCH1	dis_node
GDPD1	dis_node
GEMIN6	dis_node
GFRA3	dis_node
GHSR	dis_node
GK	dis_node
GLI3	dis_node
GLIS3	dis_node
GLOD4	dis_node
GMIP	dis_node
GMPPB	dis_node
GNA13	dis_node
GNG8	dis_node
GNS	dis_node
GPC4	dis_node
GPD1L	dis_node
GPN3	dis_node
GPR19	dis_node
GPS1	dis_node
GPS2	dis_node
GRIN2D	dis_node			huntington
GRM4	dis_node
GSR	dis_node
GSTO1	dis_node
GTPBP10	dis_node
GYG1	dis_node
GYPC	dis_node
GYS1	dis_node
HADHB	dis_node
HAX1	dis_node
HBEGF	dis_node					egf
HERC2	dis_node
HERPUD1	dis_node
HES1	dis_node
HES2	dis_node
HESX1	dis_node
HEYL	dis_node
HIATL1	dis_node
HIC2	dis_node
HIST1H2BH	dis_node
HK2	dis_node
HLA-A	dis_node
HLA-DMA	dis_node
HLA-G	dis_node
HMGN2	dis_node
HMHA1	dis_node
HNMT	dis_node
HNRPDL	dis_node
HOOK1	dis_node
HPDL	dis_node
HPN	dis_node
HRK	dis_node
HSD17B14	dis_node
HSPB2	dis_node		angio
HTR2C	dis_node
HYAL1	dis_node
HYLS1	dis_node
IARS2	dis_node
IBTK	dis_node
ID2	dis_node
ID4	dis_node
IDS	dis_node
IER5L	dis_node
IFITM1	dis_node
IFITM2	dis_node
IFNGR1	dis_node
IGSF1	dis_node
IGSF21	dis_node
IKBIP	dis_node
IL13RA1	dis_node
IL1A	dis_node
IL1RAPL1	dis_node
IMP4	dis_node
IRF6	dis_node
IRF7	dis_node
IRS1	dis_node
ISG15	dis_node
ISG20L2	dis_node
ISOC1	dis_node
ISYNA1	dis_node
ITGA2	dis_node	integrin
ITGA5	dis_node	integrin
ITPKB	dis_node
IVNS1ABP	dis_node
JARID2	dis_node
JAZF1	dis_node
JMJD1C	dis_node
JPH1	dis_node
JUB	dis_node
KARS	dis_node
KATNA1	dis_node
KCNK13	dis_node
KCNK5	dis_node
KCTD12	dis_node
KCTD8	dis_node
KDELR3	dis_node
KIAA0182	dis_node
KIAA0363	dis_node
KIAA1274	dis_node
KIDINS220	dis_node
KIF1A	dis_node
KIF3C	dis_node
KIFC2	dis_node
KLF11	dis_node
KLF13	dis_node
KLHL9	dis_node
KLK3	dis_node
KLRG1	dis_node
LACTB	dis_node
LAG3	dis_node
LAMP2	dis_node
LCMT2	dis_node
LDB3	dis_node
LDHD	dis_node
LDOC1	dis_node
LEF1	dis_node
LETM1	dis_node
LGALS8	dis_node
LGMN	dis_node
LHX5	dis_node
LINGO1	dis_node
LIPA	dis_node
LITAF	dis_node
LMX1A	dis_node
LPAR1	dis_node
LPCAT3	dis_node
LPHN1	dis_node
LRAT	dis_node
LRP11	dis_node
LRPPRC	dis_node
LRRC45	dis_node
LRRFIP2	dis_node
LRTOMT	dis_node
LSG1	dis_node
LSM7	dis_node
LY6E	dis_node
LYPLA1	dis_node
MAP3K1	dis_node	integrin	angio			egf	fgf
MAP3K12	dis_node
MAPK4	dis_node
2013-03-03	dis_node
MARCKS	dis_node
MATK	dis_node
MB	dis_node
MBD2	dis_node
MBNL2	dis_node
MBP	dis_node
MDH1	dis_node
ME1	dis_node
METTL11A	dis_node
METTL13	dis_node
MFGE8	dis_node
MFSD3	dis_node
MICA	dis_node
MICAL1	dis_node	integrin
MID1	dis_node
MID1IP1	dis_node
MLEC	dis_node
MLKL	dis_node
MLST8	dis_node
MMP11	dis_node
MMP15	dis_node
MPP5	dis_node
MRPL19	dis_node
MRPS2	dis_node
MRPS22	dis_node
MRPS24	dis_node
MRRF	dis_node
MSC	dis_node
MSRB2	dis_node
MSRB3	dis_node
MST4	dis_node
MSX1	dis_node
MT1A	dis_node
MT1E	dis_node
MTA1	dis_node
MTHFS	dis_node
MTX2	dis_node
MUM1	dis_node
MYADM	dis_node
MYLIP	dis_node
MYLK	dis_node				cytoskeleton
MYO18A	dis_node
MYO1E	dis_node
MYO3B	dis_node				cytoskeleton
MYO5C	dis_node
Magmas	dis_node
NACC2	dis_node
NAGPA	dis_node
NCBP1	dis_node
NCLN	dis_node
NCOA6	dis_node
NCOR2	dis_node			huntington
NDUFA4	dis_node
NDUFA9	dis_node
NDUFB7	dis_node
NDUFS8	dis_node
NECAB2	dis_node
NEO1	dis_node
NEURL1B	dis_node
NINJ1	dis_node
NLE1	dis_node
NLGN1	dis_node
NME4	dis_node
NME5	dis_node
NMU	dis_node
NOS2	dis_node		angio
NOS2A	dis_node
NOTCH3	dis_node		angio
NOXO1	dis_node
NPM3	dis_node
NPTX1	dis_node
NR2E1	dis_node
NR2E3	dis_node
NR2F1	dis_node
NR2F2	dis_node
NR2F6	dis_node
NRD1	dis_node
NRG1	dis_node
NRIP1	dis_node
NSMCE1	dis_node
NSMCE4A	dis_node
NT5DC2	dis_node
NTN1	dis_node
NUAK2	dis_node
NUP62CL	dis_node
OAS3	dis_node
OGDHL	dis_node
OLFM2	dis_node
OLFML2A	dis_node
OLFML3	dis_node
ORM2	dis_node
OTX1	dis_node
PABPC3	dis_node
PACSIN2	dis_node
PAFAH1B1	dis_node
PAK6	dis_node				cytoskeleton
PAM	dis_node
PANK2	dis_node
PANK3	dis_node
PARD6G	dis_node
PARP14	dis_node
PAX6	dis_node
PBRM1	dis_node
PCDH7	dis_node
PCK2	dis_node
PDCD10	dis_node
PDE4D	dis_node
PDE5A	dis_node
PDGFD	dis_node		angio
PDIA4	dis_node
PDK3	dis_node
PDSS1	dis_node
PDXDC1	dis_node
PDYN	dis_node
PDZD2	dis_node
PELI2	dis_node
PFKFB2	dis_node
PGD	dis_node
PHF15	dis_node
PIAS1	dis_node
PIK3CB	dis_node	integrin	angio			egf	fgf
PIM1	dis_node
PIP5K2A	dis_node
PIPSL	dis_node
PKP3	dis_node
PLA2G7	dis_node
PLAC9	dis_node
PLCB2	dis_node
PLCG2	dis_node		angio			egf	fgf
PLEKHA1	dis_node
PLEKHA4	dis_node
PLEKHF1	dis_node
PLEKHO2	dis_node
PLSCR1	dis_node
PLXNA1	dis_node
PLXNB1	dis_node
PLXNB2	dis_node
PMEPA1	dis_node
PNO1	dis_node
PODXL	dis_node
POFUT2	dis_node
POLR1D	dis_node
POLR2G	dis_node
PON1	dis_node
POU3F1	dis_node
POU3F2	dis_node
PPA1	dis_node
PPARD	dis_node
PPP1R14A	dis_node
PPP1R15A	dis_node
PPP1R3B	dis_node
PPP2R2C	dis_node						fgf
PPP2R2D	dis_node						fgf
PRDM16	dis_node
PRDX3	dis_node
PRDX5	dis_node
PREB	dis_node
PREP	dis_node
PRKAG2	dis_node
PRKCA	dis_node		angio			egf	fgf
PRKCB1	dis_node
PRKCH	dis_node		angio			egf	fgf
PRKD1	dis_node		angio			egf
PRKX	dis_node
PRMT2	dis_node
PRMT5	dis_node
PRODH	dis_node			huntington
PRPF40A	dis_node
PRR14	dis_node
PRR3	dis_node
PRRG1	dis_node
PRSS8	dis_node
PSMA6	dis_node
PSMB2	dis_node
PSMC3	dis_node
PSMD1	dis_node
PSMD14	dis_node
PSMD6	dis_node
PSMD8	dis_node
PSMG4	dis_node
PTAR1	dis_node
PTCHD2	dis_node
PTGES3	dis_node
PTGS1	dis_node
PTMS	dis_node
PTPN13	dis_node
PTPN4	dis_node
PTPRE	dis_node
PTPRM	dis_node
PTRH1	dis_node
PTRH2	dis_node
PUSL1	dis_node
PVALB	dis_node
PXN	dis_node	integrin	angio
PYCR2	dis_node
R3HCC1	dis_node
RAB11FIP1	dis_node
RAB15	dis_node
RAB24	dis_node
RAB25	dis_node			huntington
RAB38	dis_node
RAB3B	dis_node
RAB3IP	dis_node
RABGAP1	dis_node
RAC2	dis_node	integrin		huntington	cytoskeleton	egf	fgf
RALGPS1	dis_node	integrin	angio			egf	fgf
RAP1GAP	dis_node
RAPGEF5	dis_node
RARB	dis_node
RASAL2	dis_node					egf
RASD2	dis_node
RASGRF2	dis_node
RASGRP2	dis_node
RAVER1	dis_node
RAX	dis_node
RBM19	dis_node
RBM24	dis_node
RBM43	dis_node
RBM47	dis_node
RBM9	dis_node
RBMS1	dis_node
RBP1	dis_node
RCOR2	dis_node
RDH11	dis_node
REEP5	dis_node
RELN	dis_node
REPS2	dis_node
RET	dis_node
RFX1	dis_node
RFX3	dis_node
RGMA	dis_node
RHBDD2	dis_node
RHOB	dis_node	integrin	angio		cytoskeleton
RHOG	dis_node			huntington		egf
RIMS4	dis_node
RIOK3	dis_node
RN7SK	dis_node
RNASE4	dis_node
RNASEH2C	dis_node
RND2	dis_node	integrin
RNF135	dis_node
RNF167	dis_node
ROBO1	dis_node
RPE	dis_node
RPL13A	dis_node
RPL14	dis_node
RPL36AL	dis_node
RPL38	dis_node
RPN1	dis_node
RPS15A	dis_node
RRP7A	dis_node
RTN4	dis_node
RTN4IP1	dis_node
RXRA	dis_node
S100A11	dis_node
SAMM50	dis_node
SARS	dis_node
SC5DL	dis_node
SCARB1	dis_node
SCARF2	dis_node
SDC2	dis_node
SDHB	dis_node
SDHC	dis_node
SDHD	dis_node
SDSL	dis_node
SEC14L4	dis_node
SEC24D	dis_node
SEC61B	dis_node
SELS	dis_node
SEMA3A	dis_node
SEMA4B	dis_node
2013-09-06	dis_node
SERPINA5	dis_node
SERPINB1	dis_node
SERPINB6	dis_node
SERPING1	dis_node
SERPINI1	dis_node
SERTAD4	dis_node
SH2D3A	dis_node
SH2D3C	dis_node
SH3BP1	dis_node
SH3GL2	dis_node
SH3YL1	dis_node
SHQ1	dis_node
SIGIRR	dis_node
SIPA1L2	dis_node
SLC16A5	dis_node
SLC1A3	dis_node
SLC1A5	dis_node
SLC25A1	dis_node
SLC25A12	dis_node
SLC25A21	dis_node
SLC25A43	dis_node
SLC25A5	dis_node
SLC27A6	dis_node
SLC2A2	dis_node
SLC2A8	dis_node
SLC44A1	dis_node
SLC44A2	dis_node
SLC6A15	dis_node
SLC6A8	dis_node
SLC7A10	dis_node
SLC7A2	dis_node
SMAP1	dis_node
SMARCA5	dis_node
SMTN	dis_node
SNCB	dis_node
SNRPF	dis_node
SOCS3	dis_node
SOCS7	dis_node
SORL1	dis_node
SOX13	dis_node
SOX2	dis_node
SOX4	dis_node
SOX6	dis_node
SP8	dis_node			huntington
SPINK1	dis_node
SPINT2	dis_node
SPOCK1	dis_node
SPTBN1	dis_node
SRF	dis_node
SRP19	dis_node
SRR	dis_node
SSH2	dis_node				cytoskeleton
ST14	dis_node
STAMBP	dis_node
STAMBPL1	dis_node
STAR	dis_node
STK17B	dis_node
STK36	dis_node					egf	fgf
STK39	dis_node
STMN1	dis_node				cytoskeleton
STMN4	dis_node				cytoskeleton
STX16	dis_node
SUCLG1	dis_node
SULF2	dis_node
SULT1A3	dis_node
SURF6	dis_node
SYN2	dis_node
SYNCRIP	dis_node
TAP2	dis_node
TAPBP	dis_node
TBC1D9	dis_node
TBCA	dis_node
TBL1X	dis_node
TBL2	dis_node
TBRG4	dis_node
TCEAL8	dis_node
TCEB3	dis_node
TCF7L1	dis_node
TCL1B	dis_node
TESC	dis_node
TFAP2C	dis_node
TFE3	dis_node
TGFA	dis_node					egf
TGM2	dis_node
THBS3	dis_node
THBS4	dis_node
THUMPD2	dis_node
TIMM9	dis_node
TIMP2	dis_node
TIMP3	dis_node
TLE2	dis_node
TLE3	dis_node
TM9SF2	dis_node
TMED2	dis_node
TMEM108	dis_node
TMEM14A	dis_node
TMEM180	dis_node
TMEM189-UBE2V1	dis_node
TMEM2	dis_node
TMEM37	dis_node
TMEM63A	dis_node
TNFRSF10B	dis_node
TNFRSF21	dis_node
TNNT1	dis_node
TNRC9	dis_node
TOPORS	dis_node
TOX3	dis_node
TP53I11	dis_node
TP53RK	dis_node
TRAF3IP2	dis_node
TRAF5	dis_node
TRERF1	dis_node
TRIM22	dis_node
TRIM56	dis_node
TRIM71	dis_node
TRIOBP	dis_node
TRMT112	dis_node
TSC22D1	dis_node
TSHZ3	dis_node
TSPAN3	dis_node
TSPAN4	dis_node
TSPO	dis_node
TTC39C	dis_node
TXNL4A	dis_node
TXNRD1	dis_node
TXNRD2	dis_node
UBC	dis_node
UBE2F	dis_node
UBE2Q2	dis_node
UBE3B	dis_node
UBR7	dis_node
UBTD1	dis_node
UPF2	dis_node
URB2	dis_node
USP21	dis_node
USP47	dis_node
USP7	dis_node
VAMP8	dis_node
VANGL2	dis_node
VDAC3	dis_node
VENTX	dis_node
VGF	dis_node
VIPR1	dis_node
VPS13D	dis_node
VPS16	dis_node
VPS18	dis_node
VTN	dis_node
WBP11	dis_node
WDFY1	dis_node
WDR19	dis_node
WFIKKN1	dis_node
WFIKKN2	dis_node
XPR1	dis_node
XRCC6BP1	dis_node
XRN2	dis_node
YARS	dis_node
YIF1A	dis_node
ZBTB25	dis_node
ZCCHC12	dis_node
ZDHHC12	dis_node
ZDHHC23	dis_node
ZEB2	dis_node
ZFHX4	dis_node
ZFP36L1	dis_node
ZFYVE21	dis_node
ZHX2	dis_node
ZIC2	dis_node
ZMYND8	dis_node
ZNF165	dis_node
ZNF214	dis_node
ZNF215	dis_node
ZNF219	dis_node
ZNF250	dis_node
ZNF323	dis_node
ZNF431	dis_node
ZNF462	dis_node
ZNF503	dis_node
ZNF521	dis_node
ZNF593	dis_node
ZNF606	dis_node
ZNF627	dis_node
ZNF74	dis_node
ZNHIT6	dis_node
AASS	both_node
ABCA1	both_node
ABCB6	both_node
ABCC4	both_node
ABCE1	both_node
ABCF1	both_node
ACAT1	both_node
ACAT2	both_node
ACLY	both_node
ACO1	both_node
ACSL3	both_node
ACTA1	both_node			huntington	cytoskeleton
ACTC1	both_node			huntington	cytoskeleton
ACTG2	both_node			huntington	cytoskeleton
ACTN3	both_node
ACVR1	both_node
ACVR1B	both_node
ACVR2A	both_node
ACY1	both_node
ADAMTS1	both_node
ADAR	both_node
ADM	both_node
ADORA2B	both_node
ADRA2A	both_node
ADRM1	both_node
ADSL	both_node
ADSS	both_node
AES	both_node
AFG3L2	both_node
AFP	both_node
AHI1	both_node
AHNAK	both_node
AHSA1	both_node
AK2	both_node
AKAP1	both_node
AKIRIN1	both_node
AKR1B1	both_node
ALCAM	both_node
ALDH1A3	both_node
ALDOC	both_node
ALG3	both_node
AMD1	both_node
ANK2	both_node
ANXA1	both_node
ANXA2	both_node
ANXA3	both_node
ANXA5	both_node
AP1M2	both_node
AP2M1	both_node
APEX1	both_node
APH1B	both_node
APIP	both_node
APITD1	both_node
APLP1	both_node
APOA1BP	both_node
APOBEC3B	both_node
APOE	both_node
APP	both_node
APRT	both_node
AQR	both_node
ARAP3	both_node
ARFGEF1	both_node
ARFGEF2	both_node
ARHGAP22	both_node
ARHGAP23	both_node
ARHGAP8	both_node		angio		cytoskeleton
ARHGDIA	both_node
ARHGDIB	both_node
ARHGEF5	both_node
ARL4A	both_node			huntington
ARPC2	both_node	integrin			cytoskeleton
ARPC5L	both_node	integrin		huntington	cytoskeleton
ARRB1	both_node
ASCC3	both_node
ASF1A	both_node
ASGR1	both_node
ASNS	both_node
ASS1	both_node
ATF3	both_node
ATF4	both_node
ATF5	both_node
ATG3	both_node
ATP1B1	both_node
ATP2A2	both_node
ATP2B4	both_node
ATP5A1	both_node
ATP5D	both_node
ATP5G1	both_node
ATP5H	both_node
ATP6V1B1	both_node
ATP6V1G2	both_node
ATP9A	both_node
AURKAIP1	both_node
AURKB	both_node
AVEN	both_node
AZIN1	both_node
B3GNT2	both_node
BAD	both_node		angio
BAMBI	both_node
BARHL1	both_node
BAX	both_node			huntington
BBS1	both_node
BCAR1	both_node	integrin
BCAR3	both_node
BCCIP	both_node
BCL11A	both_node
BCL2	both_node
BCL2L1	both_node
BCL6	both_node
BEND3	both_node
BEND5	both_node
BID	both_node
BMPR1A	both_node
BNIP3L	both_node
BNIPL	both_node
BOK	both_node
BOP1	both_node
BPTF	both_node
BRIX1	both_node
BSN	both_node
BUB1	both_node
BUB1B	both_node
BUB3	both_node
C11orf51	both_node
C16orf48	both_node
C1GALT1	both_node
C1QBP	both_node
C1orf168	both_node
C1orf94	both_node
C3orf15	both_node
C6orf106	both_node
C6orf211	both_node
C7orf20	both_node
C9orf9	both_node
CACNB3	both_node
CACYBP	both_node
CADPS2	both_node
CALCA	both_node
CALD1	both_node
CALR	both_node
CAMKV	both_node
CAPN12	both_node			huntington
CARD11	both_node
CARS	both_node
CASP3	both_node			huntington
CAV1	both_node	integrin
CAV2	both_node
CBR1	both_node
CBS	both_node
CBX3	both_node
CCDC130	both_node
CCDC59	both_node
CCDC6	both_node
CCL2	both_node
CCL26	both_node
CCNA2	both_node
CCNC	both_node
CCNE1	both_node
CCT3	both_node
CCT6A	both_node
CCT7	both_node
CD2AP	both_node
CD44	both_node
CD47	both_node
CD74	both_node
CD83	both_node
CD9	both_node
CDC123	both_node
CDC16	both_node
CDC42BPA	both_node
CDCA3	both_node
CDCA4	both_node
CDCA7	both_node
CDCA7L	both_node
CDH1	both_node
CDH2	both_node
CDK2AP1	both_node
CDK5RAP3	both_node
CDKN1A	both_node
CDKN1C	both_node
CDS1	both_node
CDT1	both_node
CDYL	both_node
CEACAM1	both_node
CEBPD	both_node
CEBPZ	both_node
CELSR2	both_node
CENTA1	both_node
CER1	both_node
CGN	both_node
CHAF1B	both_node
CHCHD3	both_node
CHIC2	both_node
CHPF	both_node
CHRNA9	both_node
CHST13	both_node
CHST15	both_node
CHSY1	both_node
CIB1	both_node
CINP	both_node
CIRH1A	both_node
CISD1	both_node
CITED2	both_node
CKB	both_node
CLDN1	both_node
CLDN3	both_node
CLDN5	both_node
CLDN7	both_node
CLN8	both_node
CMPK1	both_node
CMTM3	both_node
CNN1	both_node
COASY	both_node
COBL	both_node
COCH	both_node
COL11A1	both_node	integrin
COL13A1	both_node	integrin
COL1A1	both_node	integrin
COL2A1	both_node	integrin
COL4A5	both_node	integrin
COL4A6	both_node	integrin
COL5A2	both_node	integrin
COMMD3	both_node
COMT	both_node
COPS6	both_node
COQ10B	both_node
COQ3	both_node
CORO2A	both_node
CPNE3	both_node
CPT1A	both_node
CRELD2	both_node
CRIP2	both_node
CRLF3	both_node
CSAD	both_node
CSDA	both_node
CSE1L	both_node
CSRP1	both_node
CTDSP1	both_node
CTDSPL	both_node
CTGF	both_node
CTH	both_node
CTSA	both_node
CTSB	both_node
CTSC	both_node
CTTN	both_node
CXCL12	both_node
CXCL5	both_node
CXCL6	both_node
CXCR4	both_node
CXXC5	both_node
CXorf26	both_node
CYB5A	both_node
CYB5R2	both_node
CYP2S1	both_node
CYP51A1	both_node
CYR61	both_node
DACH1	both_node
DARS2	both_node
DAZAP1	both_node
DAZAP2	both_node
DBC1	both_node
DBI	both_node
DCLK1	both_node
DCPS	both_node
DCX	both_node
DDX21	both_node
DDX27	both_node
DDX39	both_node
DEDD	both_node
DGUOK	both_node
DHCR7	both_node
DHRS3	both_node
DHX15	both_node
DHX29	both_node
DHX37	both_node
DHX58	both_node
DIABLO	both_node
DIAPH3	both_node				cytoskeleton
DIDO1	both_node
DIO2	both_node
DIS3L	both_node
DKC1	both_node
DLK1	both_node		angio
DLL1	both_node		angio
DNAJB6	both_node
DNAJC7	both_node
DNALI1	both_node
DNMT3B	both_node
DOCK2	both_node
DPH2	both_node
DPP3	both_node
DPP9	both_node
DPPA2	both_node
DPPA4	both_node
DPYSL3	both_node
DPYSL4	both_node
DSCC1	both_node
DSTN	both_node				cytoskeleton
DTNA	both_node	integrin
DUSP1	both_node
DUSP16	both_node
DUSP3	both_node
DUSP6	both_node
DUT	both_node
EBI3	both_node
EBNA1BP2	both_node
EBP	both_node
ECD	both_node
EDC4	both_node
EDN1	both_node
EDNRB	both_node
EEF1E1	both_node
EFEMP1	both_node
EFEMP2	both_node
EFHD1	both_node
EFNB1	both_node		angio
EFNB3	both_node
EFS	both_node	integrin
EFTUD2	both_node
EGLN3	both_node
EHD4	both_node
EIF1	both_node
EIF1AX	both_node
EIF2AK2	both_node
EIF2C3	both_node
EIF3B	both_node
EIF4A3	both_node
EIF4E3	both_node
EIF4EBP1	both_node
EIF4G1	both_node
EIF5A	both_node
EIF5B	both_node
ELAVL1	both_node
ELAVL2	both_node
EMG1	both_node
ENC1	both_node
ENO3	both_node
ENOPH1	both_node
EPB41L2	both_node
EPB41L3	both_node
EPB41L5	both_node
EPCAM	both_node
EPHA1	both_node
EPHA4	both_node
EPHB2	both_node		angio
ERBB2	both_node					egf
ERBB3	both_node					egf
ERCC6L	both_node
ERRFI1	both_node
ETFB	both_node
ETS1	both_node		angio
ETV4	both_node
ETV5	both_node
EVL	both_node				cytoskeleton
EXOC2	both_node
EXOSC3	both_node
EZR	both_node
F11R	both_node
F3	both_node		angio
FA2H	both_node
FABP3	both_node
FABP5	both_node
FAM124B	both_node
FAM129A	both_node
FAM169A	both_node
FAM46B	both_node
FAM64A	both_node
FAM86A	both_node
FAM98A	both_node
FARS2	both_node
FBLN1	both_node
FBP1	both_node
FBXL6	both_node
FBXO28	both_node
FDFT1	both_node
FEZ1	both_node
FGF19	both_node
FGF2	both_node
FGFR1	both_node		angio				fgf
FGFR4	both_node						fgf
FHL2	both_node
FHOD1	both_node
FJX1	both_node
FKBP4	both_node
FLII	both_node
FLJ10374	both_node
FLRT3	both_node
FOLR1	both_node
FOXJ1	both_node
FOXK1	both_node
FOXM1	both_node
FOXO1	both_node
FRZB	both_node		angio
FSCN1	both_node
FTL	both_node
FUS	both_node
FXYD1	both_node
FXYD6	both_node
FYN	both_node	integrin
FYTTD1	both_node
FZD2	both_node		angio
FZD5	both_node		angio
GABBR2	both_node
GAD1	both_node
GADD45G	both_node
GADD45GIP1	both_node
GAL	both_node
GALNT12	both_node
GARS	both_node
GART	both_node
GAS7	both_node
GCDH	both_node
GCLM	both_node
GCSH	both_node
GDF15	both_node
GFPT1	both_node
GFPT2	both_node
GGH	both_node
GLIPR2	both_node
GLMN	both_node
GLRX3	both_node
GLS2	both_node
GMNN	both_node
GNA12	both_node
GNA14	both_node
GNL2	both_node
GNL3	both_node
GOLPH3L	both_node
GPC3	both_node
GPM6A	both_node
GPM6B	both_node
GPR176	both_node
GPT2	both_node
GRB10	both_node
GRB14	both_node		angio
GRB7	both_node		angio
GRK5	both_node
GRM3	both_node
GRPR	both_node
GRTP1	both_node
GRWD1	both_node
GSDMB	both_node
GSTP1	both_node
GTF2E2	both_node
GTF3C2	both_node
GUF1	both_node
GULP1	both_node
H1F0	both_node
H2AFY	both_node
H2AFY2	both_node
HBA2	both_node
HDAC6	both_node
HELLS	both_node
HERC5	both_node
HERC6	both_node
HES4	both_node
HES6	both_node
HEY2	both_node
HHEX	both_node
HIP2	both_node
HK1	both_node
HLA-DOA	both_node
HMBS	both_node
HMGA1	both_node
HMGB3	both_node
HMGCS1	both_node
HMMR	both_node
HMOX1	both_node
HNRNPA1	both_node
HNRNPA3	both_node
HNRNPAB	both_node
HNRNPM	both_node
HOMER2	both_node
HPRT1	both_node
HPS5	both_node
HS3ST3A1	both_node
HS6ST2	both_node
HSD11B2	both_node
HSD17B12	both_node
HSD17B4	both_node
HSP90AA1	both_node
HSP90B1	both_node
HSPA14	both_node
HSPA2	both_node
HSPA4	both_node
HSPA4L	both_node
HSPA8	both_node
HSPB1	both_node		angio
HSPB8	both_node
HSPBP1	both_node
HSPD1	both_node
HSPE1	both_node
ICAM2	both_node
ICAM3	both_node
ID1	both_node
IDH1	both_node
IDI1	both_node
IER3	both_node
IFI6	both_node
IFRD2	both_node
IGF2R	both_node
IGFBP3	both_node
IGFBP4	both_node
IGFBP5	both_node
IL27RA	both_node
IMP3	both_node
INF2	both_node
INO80D	both_node
INSIG1	both_node
IQGAP1	both_node
IQGAP2	both_node
ITGA3	both_node	integrin
ITGA6	both_node	integrin
ITGB1	both_node	integrin
ITGB1BP3	both_node
ITGB3BP	both_node
ITGB4BP	both_node
ITGB5	both_node	integrin
ITPA	both_node
ITPK1	both_node
ITPR3	both_node
JAK1	both_node		angio
JAM2	both_node
JUN	both_node		angio	huntington
KAT2B	both_node
KCND2	both_node
KCNG1	both_node
KCNG3	both_node
KCNK1	both_node
KCNK6	both_node
KCNQ2	both_node
KDR	both_node		angio
KEAP1	both_node
KIAA0020	both_node
KIAA0368	both_node
KIAA0564	both_node
KIAA0664	both_node
KIAA1217	both_node
KIAA1279	both_node
KIAA1737	both_node
KIFAP3	both_node
KIT	both_node
KITLG	both_node
KLKB1	both_node
KPNA2	both_node
LAMA1	both_node	integrin
LAMB1	both_node	integrin
LAMC2	both_node	integrin
LAMC3	both_node	integrin
LAMP1	both_node
LARP1	both_node
LARP6	both_node
LCK	both_node	integrin
LCLAT1	both_node
LCP1	both_node
LDB2	both_node
LDLR	both_node
LEFTY1	both_node
LEFTY2	both_node
LEMD3	both_node
LEO1	both_node
LGALS1	both_node
LGALS3BP	both_node
LHX2	both_node
LHX4	both_node
LIMS1	both_node	integrin
LMCD1	both_node
LMNA	both_node
LMO1	both_node
LMO3	both_node
LPAR4	both_node
LRP2	both_node
LRP8	both_node
LRRC8D	both_node
LSM3	both_node
LSS	both_node
LTBP3	both_node
LYAR	both_node
LYN	both_node
MAD2L2	both_node
MAF	both_node
MAG	both_node
MAGED1	both_node
MAK16	both_node
MAL2	both_node
MAMDC2	both_node
MAP1LC3A	both_node
MAP2	both_node
MAP2K6	both_node					egf
MAP4K1	both_node
MAP6	both_node
MAP7	both_node
MAPK1	both_node	integrin	angio			egf	fgf
MAPK10	both_node	integrin	angio	huntington		egf	fgf
MAPK13	both_node	integrin				egf	fgf
MAPK8IP3	both_node
MAPRE3	both_node
MARS2	both_node
MAT2B	both_node
MATR3	both_node
MCM3	both_node
MCM4	both_node
MCM5	both_node
MDN1	both_node
MED14	both_node
MEGF10	both_node
MEIS2	both_node
MEST	both_node
METAP1	both_node
METTL1	both_node
METTL3	both_node
METTL7A	both_node
MEX3C	both_node
MFNG	both_node
MICALL1	both_node	integrin
MICB	both_node
MIPEP	both_node
MKLN1	both_node
MLF1IP	both_node
MLF2	both_node
MME	both_node
MMP25	both_node
MMP9	both_node
MNT	both_node
MPG	both_node
MPP1	both_node
MPP6	both_node
MPRIP	both_node
MRPL11	both_node
MRPL13	both_node
MRPL15	both_node
MRPL16	both_node
MRPL17	both_node
MRPL18	both_node
MRPL2	both_node
MRPL21	both_node
MRPL23	both_node
MRPL27	both_node
MRPL32	both_node
MRPL37	both_node
MRPL4	both_node
MRPL41	both_node
MRPL44	both_node
MRPL51	both_node
MRPL55	both_node
MRPS12	both_node
MRPS17	both_node
MRPS30	both_node
MRPS35	both_node
MRPS9	both_node
MRTO4	both_node
MSI1	both_node
MT1F	both_node
MT1X	both_node
MTA3	both_node
MTAP	both_node
MTHFD1	both_node
MTHFD1L	both_node
MTHFD2	both_node
MTIF2	both_node
MTO1	both_node
MTX1	both_node
MUC4	both_node
MX1	both_node
MXD4	both_node
MXRA7	both_node
MYB	both_node
MYL6	both_node
MYL9	both_node
MYO1D	both_node
MYOZ3	both_node
NAALAD2	both_node
NADSYN1	both_node
NANOG	both_node
NANS	both_node
NAV1	both_node
NCALD	both_node
NCAPD3	both_node
NCBP2	both_node
NCL	both_node
NDN	both_node
NDRG1	both_node
NDUFB9	both_node
NDUFV2	both_node
NEDD9	both_node
NEFM	both_node
NEU1	both_node
NFE2L3	both_node
NFIB	both_node
NFKBIB	both_node
NLN	both_node
NLRP12	both_node
NLRP2	both_node
NMB	both_node
NME1	both_node
NME2	both_node
NME3	both_node
NODAL	both_node
NOL11	both_node
NOLC1	both_node
NOP10	both_node
NOP16	both_node
NOP56	both_node
NOP58	both_node
NPFFR2	both_node
NPW	both_node
NQO1	both_node
NQO2	both_node
NR5A2	both_node
NRCAM	both_node
NRP1	both_node
NRP2	both_node
NRXN2	both_node
NSBP1	both_node
NSD1	both_node
NSUN2	both_node
NSUN5	both_node
NTAN1	both_node
NTF3	both_node
NTM	both_node
NTS	both_node
NUAK1	both_node
NUDT5	both_node
NUDT9	both_node
NUP107	both_node
NUP205	both_node
NUP50	both_node
NUP88	both_node
OAT	both_node
OBSL1	both_node
ODC1	both_node
OIP5	both_node
ORC1L	both_node
ORM1	both_node
OSBPL10	both_node
OSBPL6	both_node
OSTF1	both_node
OTX2	both_node
P2RY1	both_node
PA2G4	both_node
PACSIN1	both_node			huntington
PACSIN3	both_node
PAK1	both_node		angio		cytoskeleton
PAK1IP1	both_node
PALLD	both_node
PAPLN	both_node
PAPSS2	both_node
PARD6A	both_node
PARP1	both_node
PARP12	both_node
PARVA	both_node	integrin
PCBD1	both_node
PCGF2	both_node
PCOLCE	both_node
PCSK9	both_node
PCYT2	both_node
PDCL3	both_node
PDE4B	both_node
PDE6D	both_node
PDGFB	both_node		angio
PDGFC	both_node		angio
PDGFRB	both_node		angio
PDLIM1	both_node
PDLIM5	both_node
PDLIM7	both_node
PELP1	both_node
PFAS	both_node
PFKP	both_node
PFN1	both_node				cytoskeleton
PGAM1	both_node
PGAM4	both_node
PGAM5	both_node
PGM1	both_node
PGRMC1	both_node
PHAX	both_node
PHB	both_node
PHC1	both_node
PHC2	both_node
PHF10	both_node
PHF5A	both_node
PHLDA1	both_node
PHLDA3	both_node
PIAS2	both_node
PIK3CD	both_node	integrin	angio			egf	fgf
PIM2	both_node
PINX1	both_node
PIP4K2A	both_node
PITPNB	both_node
PKM2	both_node
PKMYT1	both_node
PKP2	both_node
PLA2G3	both_node
PLA2G4C	both_node		angio
PLAGL1	both_node
PLAU	both_node
PLD3	both_node
PLOD2	both_node
PLS1	both_node
PLS3	both_node
PMAIP1	both_node
PMM2	both_node
PMP22	both_node
PNMA2	both_node
POLE2	both_node
POLR2F	both_node
POLR2H	both_node
POLR2I	both_node
POLR2J	both_node
POLR2L	both_node
POLR3G	both_node
POLR3K	both_node
POR	both_node
POU5F1	both_node
PPAN	both_node
PPAP2A	both_node
PPAP2B	both_node
PPAT	both_node
PPFIBP2	both_node
PPIC	both_node
PPIL1	both_node
PPL	both_node
PPM1B	both_node
PPM1G	both_node
PPP1R1B	both_node
PPP2R1B	both_node						fgf
PPP2R2B	both_node						fgf
PPP2R5A	both_node					egf	fgf
PPPDE1	both_node
PQLC1	both_node
PRCP	both_node
PRDX1	both_node
PRELID1	both_node
PRKCDBP	both_node
PRKCQ	both_node		angio			egf	fgf
PRNP	both_node
PROCR	both_node
PROK2	both_node
PROS1	both_node
PRSS23	both_node
PRTFDC1	both_node
PSAT1	both_node
PSMA1	both_node
PSMA2	both_node
PSMA5	both_node
PSMB10	both_node
PSMB3	both_node
PSMB5	both_node
PSMB8	both_node
PSMB9	both_node
PSMC4	both_node
PSMD12	both_node
PSMD4	both_node
PSME1	both_node
PSME4	both_node
PSMG1	both_node
PSPC1	both_node
PSRC1	both_node
PTGES2	both_node
PTGFRN	both_node
PTPLA	both_node
PTPN6	both_node		angio				fgf
PUS1	both_node
PWP1	both_node
PYCARD	both_node
PYGL	both_node
RAB17	both_node
RAB22A	both_node
RAB2A	both_node
RAB31	both_node
RAB34	both_node
RAB9A	both_node
RABGAP1L	both_node
RABGGTB	both_node
RAGE	both_node
RAI1	both_node
RAI14	both_node
RALB	both_node
RALGDS	both_node
RAN	both_node
RANBP1	both_node
RANGAP1	both_node
RAPGEF1	both_node	integrin
RARA	both_node
RARRES2	both_node
RASIP1	both_node
RASL12	both_node
RBM3	both_node
RBPJ	both_node		angio
RBPMS	both_node
RCC2	both_node
REXO2	both_node
RGL1	both_node
RGMB	both_node
RGS16	both_node
RGS17	both_node
RGS2	both_node
RGS20	both_node
RGS7	both_node
RHBDL3	both_node
RHEB	both_node
RHOBTB3	both_node
RHOC	both_node	integrin	angio		cytoskeleton
RHOQ	both_node			huntington		egf
RHOU	both_node				cytoskeleton
RIN2	both_node
RIT2	both_node	integrin	angio			egf	fgf
RND3	both_node	integrin
RNF138	both_node
RNF144B	both_node
ROR1	both_node
ROR2	both_node
RORA	both_node
RPF2	both_node
RPL13	both_node
RPL29	both_node
RPL34	both_node
RPL36A	both_node
RPL37	both_node
RPL6	both_node
RPL8	both_node
RPS15	both_node
RPS21	both_node
RPS23	both_node
RPS24	both_node
RPS26	both_node
RPS6KA1	both_node
RPS6KA2	both_node
RPS7	both_node
RRAS	both_node	integrin				egf
RRAS2	both_node					egf
RRBP1	both_node
RRM2B	both_node
RRP15	both_node
RRS1	both_node
RSU1	both_node
RTCD1	both_node
RUNX1T1	both_node
RUVBL1	both_node
RUVBL2	both_node
S100A10	both_node
S100A4	both_node
S100A6	both_node
SALL1	both_node
SAPS1	both_node
SAR1B	both_node
SC4MOL	both_node
SCD	both_node
SCNN1A	both_node
SCNN1G	both_node
SCO1	both_node
SDAD1	both_node
SDCCAG3	both_node
SDF2L1	both_node
SDHA	both_node
SDHAF2	both_node
SEC11C	both_node
SEL1L3	both_node
SEMA5B	both_node
SEMA6A	both_node
SEMG1	both_node
SEPHS1	both_node
2013-09-03	both_node
SERINC1	both_node
SERPINB4	both_node
SERPINB9	both_node
SERPINE1	both_node
SERPINE2	both_node
SERTAD2	both_node
SESN1	both_node
SF3B4	both_node
SFRP1	both_node		angio
SFRP2	both_node
SFRS1	both_node
SFRS2	both_node
SFXN2	both_node
SGK	both_node
SGK1	both_node
SGK3	both_node
SH2B3	both_node
SH3GL3	both_node			huntington
SHANK3	both_node
SHC1	both_node	integrin	angio			egf	fgf
SHMT2	both_node
SIGMAR1	both_node
SIL1	both_node
SIRT1	both_node
SIRT5	both_node
SIVA	both_node
SIX3	both_node
SIX6	both_node
SKIL	both_node
SLC25A19	both_node
SLC25A4	both_node
SLC39A6	both_node
SLC3A2	both_node
SLC4A11	both_node
SLC7A1	both_node
SLC7A3	both_node
SLC7A5	both_node
SLC9A3R1	both_node
SLIT2	both_node
SLTM	both_node
SMAD3	both_node
SMAD7	both_node
SMAP2	both_node
SMARCA2	both_node
SMPDL3B	both_node
SMS	both_node
SNAP23	both_node
SNRNP200	both_node
SNRPA1	both_node
SNRPN	both_node
SNTB1	both_node
SNX5	both_node
SNX8	both_node
SOCS1	both_node
SOCS2	both_node
SOD1	both_node
SOD2	both_node
SORBS1	both_node
SORBS2	both_node
SOX3	both_node
SOX5	both_node
SOX8	both_node
SP110	both_node
SPARC	both_node
SPHK2	both_node		angio
SPINT1	both_node
SPON1	both_node
SPP1	both_node
SPRY1	both_node					egf	fgf
SPRY2	both_node					egf	fgf
SQLE	both_node
SQSTM1	both_node
SRGAP3	both_node
SRI	both_node
SRM	both_node
SRP68	both_node
SRPX	both_node
SS18	both_node
SSBP1	both_node
SSBP2	both_node
SSNA1	both_node
SSSCA1	both_node
SSTR1	both_node
ST6GAL1	both_node
ST7	both_node
STAT1	both_node		angio			egf
STAT6	both_node					egf
STC2	both_node
STEAP3	both_node
STK40	both_node
STMN2	both_node
STOM	both_node
STRA13	both_node
STRN	both_node
SUCLA2	both_node
SUSD2	both_node
SYK	both_node
SYP	both_node
SYT1	both_node
SYT11	both_node
SYT6	both_node
TACSTD1	both_node
TAGLN	both_node
TAGLN2	both_node
TAGLN3	both_node
TALDO1	both_node
TAP1	both_node
TARS	both_node
TAX1BP3	both_node
TBC1D4	both_node
TC2N	both_node
TCEA2	both_node
TCEB2	both_node
TCF12	both_node
TCP1	both_node
TDGF1	both_node
TEK	both_node		angio
TERF1	both_node
TFPI2	both_node
TFRC	both_node
TGFB1I1	both_node	integrin	angio
TGFBI	both_node
TGFBR2	both_node
TGIF1	both_node
THBS1	both_node
THBS2	both_node
THY1	both_node
TIMM10	both_node
TIMM23	both_node
TIMM44	both_node
TIMP4	both_node
TJP2	both_node
TKT	both_node
TLE4	both_node
TMEM177	both_node
TMEM30B	both_node
TMEM64	both_node
TMPRSS2	both_node
TMX1	both_node
[truncated: 1,197 more rows]
