# Supplementary material for: Dynamic Network-Based Relevance Score Reveals Essential Proteins and Functional Modules in Directed Differentiation
Source: Stem Cells Int. 2015 Apr 21;2015:792843. doi: 10.1155/2015/792843 (PMC4419265; doi:10.1155/2015/792843)
Supplement: Supplementary file 1 — The supplementary materials contain the whole interaction difference networks from LSB stage to LSB/S/F8 stage and from LSB/S/F8 stage to LSB/S/F8/CHIR stage (docx file) and the tables used in Cytoscape to visualize the interaction difference networks (xlsx files). [file 792843.f1.zip › New folder/difference_LSBF8CHIR-LSBF8_edge_cytoscape.xlsx]

## Sheet: 工作表2
CACYBP	AARS	dis_mo	-0.01212
DPP9	AARS	dis_po	0.105477
GDI2	AARS	dis_mo	-0.000670781
LARS	AARS	dis_po	0.0129873
MRTO4	AARS	dis_mo	-0.000271913
SOD1	AARS	dis_mo	-0.000952166
ARPC2	AARSD1	dis_mo	-0.0126526
CALR	AARSD1	dis_po	0.0184619
GTF2E1	AARSD1	dis_po	0.0522515
PFDN5	AARSD1	dis_po	0.0324969
RPA3	AARSD1	dis_mo	-0.0140245
RPUSD2	AARSD1	dis_po	0.000754052
TPD52L2	AARSD1	dis_mo	-0.910833
ASS1	ABAT	dis_mo	-0.118514
ISCU	ABAT	dis_mo	-0.15628
PFDN5	ABAT	dis_po	0.104752
PRELID1	ABAT	dis_po	0.0818772
LIN7A	ABCA1	dis_po	0.0215073
PLTP	ABCA1	dis_po	0.0221139
SNTB1	ABCA1	dis_po	0.0509218
SLC9A3R1	ABCC4	dis_mo	-0.0437264
ANK2	ABCC8	dis_mo	-0.101262
ENSA	ABCC8	dis_po	0.0557184
EIF5	ABCE1	dis_mo	-0.00909261
ICAM2	ABCE1	dis_mo	-0.0033858
VCAM1	ABCE1	dis_po	0.011459
C14orf166	ABCF1	dis_mo	-0.0180015
EDC4	ABCF1	dis_mo	-0.0329611
FKBP3	ABCF1	dis_po	0.189914
PINX1	ABCF1	dis_po	0.00169856
PSMC5	ABCF1	dis_po	0.00224479
SRPK1	ABCF1	dis_po	0.00690471
TRIP10	ABHD11	dis_po	0.0341869
EIF6	ABHD14A	dis_po	0.338388
GINS3	ABHD14A	dis_mo	-0.119914
GSS	ABHD14A	dis_po	0.0167025
HSPA9	ABHD14A	dis_po	0.00976876
ATG16L1	ACADM	dis_po	0.0365574
ETFB	ACADM	dis_mo	-0.139248
AKT1	ACAP1	dis_po	0.151845
IKBKG	ACAP1	dis_mo	-0.484529
TFRC	ACAP1	dis_mo	-0.227332
CKS1B	ACAT1	dis_po	0.00713843
GARS	ACAT1	dis_po	0.0058587
MAEA	ACAT1	dis_mo	-0.155272
MPG	ACAT1	dis_po	0.0205785
NRBF2	ACAT1	dis_po	0.00214694
OAT	ACAT1	dis_po	0.0192196
SARS2	ACAT1	dis_po	0.0102322
SDHA	ACAT1	dis_mo	-0.00418289
SOD1	ACAT1	dis_mo	-0.000800778
TOMM7	ACAT1	dis_po	0.128378
CSNK2A1	ACAT2	dis_po	0.0194542
PSAT1	ACAT2	dis_po	0.0465994
UBA3	ACAT2	dis_mo	-0.00390159
VASP	ACAT2	dis_mo	-0.0356286
APP	ACBD6	dis_po	0.0517431
PICK1	ACCN2	dis_mo	-0.0189071
STOM	ACCN2	dis_mo	-0.0281485
COL1A1	ACHE	dis_mo	-0.163902
ARMCX3	ACIN1	dis_mo	-0.0294393
GRK5	ACIN1	dis_mo	-0.00139162
HDAC6	ACIN1	dis_mo	-0.00135387
HNRNPA1	ACIN1	dis_mo	-0.00262076
PCBD1	ACIN1	dis_po	0.017758
SNRPB2	ACIN1	dis_po	0.000134398
SSB	ACIN1	dis_mo	-0.00223838
NRBF2	ACLY	dis_po	0.0154631
SHC1	ACLY	dis_po	0.0137614
SNTB1	ACLY	dis_po	0.0142086
APP	ACO1	dis_po	0.339183
PSMG1	ACO1	dis_mo	-0.0661566
GDI1	ACOT7	dis_po	0.0384624
NDRG1	ACOT7	dis_mo	-0.00627898
PIK3C2A	ACOT7	dis_mo	-0.0742948
RCC2	ACOT7	dis_mo	-0.0329886
EGFR	ACSL3	dis_mo	-0.08923
GTF2F2	ACSL3	dis_mo	-0.153143
ILK	ACSL3	dis_po	0.0370941
LYN	ACSL3	dis_po	0.0496232
SPG20	ACSL3	dis_mo	-0.0108462
ADSS	ACTA1	dis_mo	-0.09291
CORO2B	ACTA1	dis_po	0.0492272
EPB41L2	ACTA1	dis_po	0.214587
ETV6	ACTA1	dis_mo	-0.00658275
FHOD1	ACTA1	dis_mo	-0.0264015
FSCN1	ACTA1	dis_mo	-0.0104376
GAS7	ACTA1	dis_mo	-0.0730816
IQGAP1	ACTA1	dis_po	0.00137366
KIF23	ACTA1	dis_mo	-0.0375482
PGRMC1	ACTA1	dis_po	0.0569941
PIK3C2A	ACTA1	dis_po	0.00278718
TAGLN	ACTA1	dis_po	0.0615786
TAGLN2	ACTA1	dis_mo	-0.0114541
ANXA2	ACTB	dis_mo	-0.00194896
ATG3	ACTB	dis_mo	-0.00808288
BBS4	ACTB	dis_mo	-0.0194125
CCT6A	ACTB	dis_mo	-0.0202814
DMAP1	ACTB	dis_mo	-0.0251083
ENC1	ACTB	dis_po	0.113595
EPB41L2	ACTB	dis_mo	-0.000173994
FHOD1	ACTB	dis_po	0.0166944
FLII	ACTB	dis_mo	-0.00885267
GLRX3	ACTB	dis_mo	-0.018255
GOLPH3L	ACTB	dis_mo	-0.0631695
HMGCS1	ACTB	dis_po	0.0183625
HPCAL1	ACTB	dis_mo	-0.229279
MAP1A	ACTB	dis_mo	-0.0224542
MAP2	ACTB	dis_po	0.00939057
MCM7	ACTB	dis_mo	-0.00637396
MRPS12	ACTB	dis_po	0.0154342
MX1	ACTB	dis_mo	-0.0470839
NCALD	ACTB	dis_mo	-0.0489117
NSUN5	ACTB	dis_mo	-0.0329217
RAD54L	ACTB	dis_mo	-0.016164
RAN	ACTB	dis_mo	-0.00161301
SORBS1	ACTB	dis_po	0.00485254
TAGLN	ACTB	dis_po	0.0156366
TK1	ACTB	dis_po	0.00151106
TMEM30B	ACTB	dis_mo	-0.109924
TPM2	ACTB	dis_po	0.00629739
TPM3	ACTB	dis_mo	-0.0281811
VASP	ACTB	dis_mo	-0.0116314
CD2AP	ACTC1	dis_po	0.00110077
EIF4A3	ACTC1	dis_po	0.00988947
EZR	ACTC1	dis_po	0.0581396
KPTN	ACTC1	dis_po	0.000883043
SH3KBP1	ACTC1	dis_po	0.0164661
UCHL5	ACTC1	dis_mo	-0.0166223
CNN1	ACTG2	dis_po	0.0172265
CTTN	ACTG2	dis_po	0.000179176
IQGAP1	ACTG2	dis_mo	-0.0156398
LCP1	ACTG2	dis_mo	-0.0134474
MYL9	ACTG2	dis_mo	-0.0202913
TAGLN2	ACTG2	dis_po	0.00385219
CSRP1	ACTN1	dis_mo	-0.00272397
GNG3	ACTN1	dis_mo	-0.0766445
KCNA5	ACTN1	dis_mo	-0.0617442
KPNA2	ACTN1	dis_po	0.00159584
LIMA1	ACTN1	dis_po	0.0442495
MAP1A	ACTN1	dis_mo	-0.021232
MAP2	ACTN1	dis_po	0.00956902
MSN	ACTN1	dis_po	0.021524
PALLD	ACTN1	dis_po	0.0981135
PDLIM1	ACTN1	dis_po	0.156324
ACVR1B	ACVR1	dis_mo	-0.00865046
BAMBI	ACVR1	dis_po	0.00572762
PEG10	ACVR1	dis_mo	-0.419666
RAB6B	ACVR1	dis_mo	-0.0183971
RALGPS2	ACVR1	dis_po	0.058386
RASL12	ACVR1	dis_po	0.0386305
RRAS2	ACVR1	dis_mo	-0.039199
TGFBR2	ACVR1	dis_mo	-0.0332406
TTC27	ACVR1	dis_po	0.00609184
UBXN1	ACVR1	dis_po	0.0594238
ACVR1	ACVR1B	dis_mo	-0.00865046
BMPR2	ACVR1B	dis_mo	-0.0452631
BRCA1	ACVR1B	dis_mo	-0.00501734
LEFTY1	ACVR1B	dis_po	0.0448381
NODAL	ACVR1B	dis_po	0.0140035
RGS20	ACVR1B	dis_po	0.0221864
RHEB	ACVR1B	dis_mo	-0.0327532
STOML2	ACVR1B	dis_mo	-0.0174746
TOB1	ACVR1B	dis_mo	-0.0054984
BMP7	ACVR2A	dis_po	0.0343036
BMPR1A	ACVR2A	dis_mo	-0.00831843
LEFTY2	ACVR2A	dis_po	0.0408849
NODAL	ACVR2A	dis_po	0.0228147
BBS2	ACY1	dis_po	0.0798845
BBS4	ACY1	dis_mo	-0.585422
TTC1	ACY1	dis_po	0.581455
FRS3	ADAM23	dis_mo	-0.0126439
PRNP	ADAM23	dis_po	0.0491872
YWHAB	ADAM23	dis_mo	-0.0207642
COL5A2	ADAMTS1	dis_mo	-0.036269
HSPA5	ADAMTS1	dis_po	0.0098657
IGFBP5	ADAMTS1	dis_mo	-0.0544281
IGFBP6	ADAMTS1	dis_mo	-0.0456753
LAMB1	ADAMTS1	dis_po	0.0429809
EIF2AK2	ADAR	dis_mo	-0.0103906
HNRNPA1	ADAR	dis_mo	-0.0554354
SNRPB	ADAR	dis_mo	-0.0080083
MCM7	ADD3	dis_po	0.144883
APIP	ADI1	dis_po	0.0579176
ATIC	ADI1	dis_po	0.000398724
ELAVL1	ADIPOR1	dis_mo	-0.124203
ADM2	ADM	dis_mo	-0.0200235
CALCA	ADM	dis_mo	-0.0399255
EDN1	ADM	dis_mo	-0.100069
GNG2	ADM	dis_mo	-0.0423287
MME	ADM	dis_mo	-0.0993082
ADM	ADM2	dis_mo	-0.0200235
ADORA2B	ADM2	dis_po	0.0246495
CALCA	ADM2	dis_po	0.0620182
ADM2	ADORA2B	dis_po	0.0246495
CALCA	ADORA2B	dis_po	0.135227
CCL2	ADORA2B	dis_po	0.0571586
TPD52L2	ADORA2B	dis_po	0.135712
CXCL12	ADRA2A	dis_mo	-0.0127505
CXCL6	ADRA2A	dis_mo	-0.00695421
NPW	ADRA2A	dis_mo	-0.00763702
EGFR	ADRM1	dis_po	0.0313806
PSMA2	ADRM1	dis_mo	-0.00736434
APRT	ADSL	dis_mo	-0.00892278
CTSC	ADSL	dis_po	0.138684
EHD4	ADSL	dis_mo	-0.0148504
PFAS	ADSL	dis_mo	-0.00482437
SAE1	ADSL	dis_po	0.00163205
ACTA1	ADSS	dis_mo	-0.09291
CBX3	ADSS	dis_mo	-0.00373846
HSPE1	ADSS	dis_mo	-0.017369
IDH1	ADSS	dis_mo	-0.0134565
IKBKE	ADSS	dis_po	0.0440214
TALDO1	ADSS	dis_po	0.0135803
ELAVL1	AES	dis_po	0.121771
GTF2E1	AES	dis_mo	-0.0855138
SIX3	AES	dis_po	0.102697
ATG4C	AFG3L2	dis_mo	-0.0157613
ATP2C1	AFG3L2	dis_po	0.00573556
CDC16	AFG3L2	dis_po	0.040765
LONP1	AFG3L2	dis_mo	-0.0113299
PHB	AFG3L2	dis_po	0.0423735
CASP3	AFP	dis_mo	-0.00755807
TMEM14B	AGTRAP	dis_po	0.266816
ELAVL1	AHI1	dis_mo	-0.0238291
CHN2	AHNAK	dis_po	0.0204271
FYN	AHNAK	dis_mo	-0.00461312
MCM7	AHNAK	dis_mo	-0.0107521
AMD1	AHSA1	dis_po	0.0431238
APP	AHSA1	dis_mo	-0.00577178
CCT6A	AHSA1	dis_po	0.0183767
GABARAPL2	AHSA1	dis_mo	-0.000725749
GSTK1	AHSA1	dis_po	0.0178086
IARS	AHSA1	dis_po	0.00232013
NEK6	AHSA1	dis_mo	-0.00270504
NTHL1	AHSA1	dis_po	0.0125348
RFC5	AHSA1	dis_po	0.0081589
SRP68	AHSA1	dis_mo	-0.00885251
TOMM70A	AHSA1	dis_mo	-0.00992645
ELAVL1	AIF1L	dis_mo	-0.0497059
ATG16L1	AIFM1	dis_mo	-0.00355827
ATG4C	AIFM1	dis_po	0.0341523
MLH1	AIFM1	dis_mo	-0.00174022
PELO	AIFM1	dis_po	0.0503852
STC2	AIFM1	dis_po	0.0230462
APP	AIMP2	dis_mo	-0.0104614
EEF1E1	AIMP2	dis_po	0.00679674
EPRS	AIMP2	dis_mo	-0.00125408
TERF2IP	AIMP2	dis_mo	-0.00791697
DDX18	AK2	dis_mo	-0.00880617
EIF1AX	AK2	dis_po	0.00637408
FBP1	AK2	dis_mo	-0.011014
HIP2	AK2	dis_po	0.149603
HMGCS1	AK2	dis_po	0.0121528
MRPL12	AK2	dis_po	0.00230906
MRPL3	AK2	dis_mo	-0.00758377
PSMD4	AK2	dis_po	0.01354
SOD1	AK2	dis_mo	-0.0140984
C3orf15	AKAP1	dis_po	0.00157717
EGFR	AKAP12	dis_po	0.0472206
ELAVL1	AKIRIN1	dis_mo	-0.0190328
GJA1	AKR1B1	dis_mo	-0.0559409
ACAP1	AKT1	dis_po	0.151845
CHEK1	AKT1	dis_mo	-8.8372e-05
CTNND2	AKT1	dis_mo	-0.00343279
FOXO1	AKT1	dis_mo	-0.0260418
LDHA	AKT1	dis_po	0.0240949
MXD1	AKT1	dis_mo	-0.180271
PIK3CD	AKT1	dis_po	0.00224868
SH3RF1	AKT1	dis_po	0.0404105
SORBS2	AKT1	dis_po	0.00976885
TBC1D4	AKT1	dis_po	0.00939957
TNFSF11	AKT1	dis_po	1.1195
TUBB	AKT1	dis_mo	-0.00082083
VASP	AKT1	dis_mo	-0.000639919
CTTN	ALCAM	dis_mo	-0.0325001
EFNA1	ALCAM	dis_po	0.0219
EGFR	ALCAM	dis_mo	-0.0350427
ITGA3	ALCAM	dis_mo	-0.0896305
ELAVL1	ALDH1A3	dis_mo	-0.0487641
PIK3C2A	ALDOC	dis_mo	-0.0421586
ALG8	ALG3	dis_po	0.395662
HSPA5	ALG3	dis_mo	-0.176208
POLR2I	ALG3	dis_mo	-1.65623
PRELID1	ALG3	dis_mo	-0.02803
ZMPSTE24	ALG3	dis_po	0.00217091
ALG3	ALG8	dis_po	0.395662
CTH	ALG8	dis_mo	-0.285108
HSP90AA1	ALG8	dis_po	0.179481
MOGS	ALG8	dis_po	0.143384
SIRT1	ALG8	dis_po	0.0679531
HSP90AA1	ALLC	dis_po	0.0795006
ODC1	ALLC	dis_po	0.0574254
PRPS2	ALLC	dis_po	0.00231564
SLC25A26	ALLC	dis_mo	-0.0240593
AHSA1	AMD1	dis_po	0.0431238
ELAVL1	AMD1	dis_po	0.0454196
FYN	AMD1	dis_mo	-0.0174837
NADSYN1	AMD1	dis_mo	-0.0180153
PPAT	AMD1	dis_mo	-0.0111947
SHC1	AMD1	dis_po	0.00168303
SOD1	AMD1	dis_po	0.0296409
DYNLL1	AMOT	dis_mo	-0.0187657
LIN7A	AMOT	dis_po	0.103792
MPDZ	AMOT	dis_po	0.0875609
NIN	AMOT	dis_po	1.52693
PPFIA1	AMOT	dis_po	0.0238644
CDC26	ANAPC1	dis_mo	-0.00698504
EHMT2	ANAPC1	dis_mo	-0.0267195
CDC20	ANAPC11	dis_mo	-0.00232914
CDC25C	ANAPC11	dis_po	0.01232
CKS1B	ANAPC11	dis_po	0.00470969
EHMT2	ANAPC11	dis_mo	-0.00311542
ISOC2	ANAPC11	dis_po	0.015549
MAD2L1	ANAPC11	dis_mo	-0.00478528
PTTG1	ANAPC11	dis_mo	-0.0225367
ABCC8	ANK2	dis_mo	-0.101262
CDH1	ANK2	dis_po	0.000737177
GABARAPL2	ANK2	dis_po	0.165771
KCNQ2	ANK2	dis_po	0.0102765
KIAA0368	ANK2	dis_po	0.0411814
NRCAM	ANK2	dis_po	0.0120186
SIGMAR1	ANK2	dis_mo	-0.140378
PARP6	ANKMY2	dis_po	0.0519269
AP2M1	ANKRD28	dis_mo	-0.00173668
GRP	ANKRD28	dis_po	0.195235
LEO1	ANKRD28	dis_po	0.0391028
MAGED1	ANKRD28	dis_po	0.97714
NCL	ANKRD28	dis_po	0.029272
PLEKHG1	ANKRD28	dis_po	0.00208493
SDCCAG3	ANKRD28	dis_po	0.00418702
USP10	ANKRD28	dis_mo	-0.106302
APP	ANKS1B	dis_mo	-0.0314027
ERBB2	ANKS1B	dis_po	0.0289848
ITGB1	ANKS1B	dis_po	0.0220234
LRP2	ANKS1B	dis_mo	-0.0892111
ELAVL1	ANO6	dis_po	0.0386405
F2R	ANXA1	dis_po	0.0118204
GABBR2	ANXA1	dis_mo	-0.00170753
GAL	ANXA1	dis_po	0.0231939
GNA14	ANXA1	dis_po	0.00369536
GRP	ANXA1	dis_po	0.0158272
LPAR4	ANXA1	dis_mo	-0.00378769
NPW	ANXA1	dis_po	0.0192499
SQSTM1	ANXA1	dis_mo	-0.0016682
SSTR1	ANXA1	dis_mo	-0.0158585
ACTB	ANXA2	dis_mo	-0.00194896
ERRFI1	ANXA2	dis_mo	-0.080602
GNA12	ANXA2	dis_mo	-0.00123607
HMGA1	ANXA2	dis_po	0.0063213
PPM1B	ANXA2	dis_po	0.0760725
S100A6	ANXA2	dis_po	0.0263122
ITSN1	ANXA5	dis_mo	-0.0325661
LAMC3	ANXA5	dis_mo	-0.0167451
NDRG1	ANXA5	dis_mo	-0.0288814
EGFR	AP1G2	dis_po	0.0473203
PRMT6	AP1G2	dis_mo	-0.0700591
RAB5A	AP1G2	dis_mo	-0.00909609
APP	AP1M2	dis_po	0.0414024
ARRB1	AP1M2	dis_po	0.105396
ARRDC2	AP1M2	dis_mo	-0.281073
EGFR	AP1M2	dis_mo	-0.0196582
SCNN1A	AP1M2	dis_mo	-0.00534564
SCNN1G	AP1M2	dis_po	0.0340288
ANKRD28	AP2M1	dis_mo	-0.00173668
ATG16L1	AP2M1	dis_mo	-0.000306996
CD74	AP2M1	dis_po	0.0056007
DNAL4	AP2M1	dis_po	0.0284828
LAMP1	AP2M1	dis_mo	-0.000199255
NDRG1	AP2M1	dis_mo	-0.0236253
SYNJ1	AP2M1	dis_po	0.00272461
TUBB3	AP2M1	dis_po	0.00516537
CD74	AP2S1	dis_po	0.00839225
DNAL4	AP2S1	dis_mo	-0.0773996
PICK1	AP2S1	dis_po	0.00322749
RPS6KA1	AP2S1	dis_mo	-0.0154359
RPS6KA2	AP2S1	dis_mo	-0.0584251
SH3KBP1	AP2S1	dis_po	0.0412226
ARFIP1	AP3B1	dis_mo	-0.0556146
ARMCX3	AP3B1	dis_po	0.0298843
ARRB1	AP3B1	dis_po	0.0911808
BUB1	AP3B1	dis_mo	-0.0399641
BUB1B	AP3B1	dis_mo	-0.0714431
PACSIN1	AP3B1	dis_mo	-0.0142309
ATP6V0A1	AP3D1	dis_po	0.0128145
ENO3	AP3D1	dis_mo	-0.013354
F2R	AP3D1	dis_mo	-0.0499968
GRK5	AP3D1	dis_mo	-0.00281454
PQLC1	AP3D1	dis_mo	-0.00856982
PUS1	AP3D1	dis_po	0.0316816
THOC4	AP3D1	dis_mo	-0.023918
APLP1	APBB3	dis_mo	-0.0146636
ARPC2	APEX1	dis_mo	-0.0158968
ARPC5	APEX1	dis_mo	-0.00274134
LGALS1	APEX1	dis_mo	-0.0254858
NTHL1	APEX1	dis_mo	-0.00785874
TERF1	APEX1	dis_mo	-0.00818924
TWF2	APEX1	dis_mo	-0.0746478
UNG	APEX1	dis_po	0.00731234
WDR77	APEX1	dis_po	0.00210005
CCDC85B	APEX2	dis_po	0.0057461
CHAF1A	APEX2	dis_mo	-0.0190934
EFEMP2	APEX2	dis_po	12.6001
EIF4A3	APEX2	dis_mo	-0.0018454
RFC3	APEX2	dis_po	0.0371712
RPUSD2	APEX2	dis_po	0.0105282
TRIM37	APEX2	dis_mo	-0.0256258
ITGB3BP	APH1B	dis_po	0.0787679
ADI1	APIP	dis_po	0.0579176
CCDC85B	APIP	dis_po	1.22578
ELAVL1	APIP	dis_po	0.610201
PHGDH	APIP	dis_mo	-0.239456
VIM	APIP	dis_mo	-0.61294
AURKB	APITD1	dis_po	0.00937742
CDCA5	APITD1	dis_po	0.00374572
ERCC6L	APITD1	dis_po	0.0102041
MAD2L1	APITD1	dis_po	0.00357254
NUP107	APITD1	dis_po	0.0135357
APBB3	APLP1	dis_mo	-0.0146636
APP	APLP1	dis_po	0.0323295
ARRB1	APLP1	dis_po	0.00370929
PHF10	APLP1	dis_mo	-0.0130466
TK1	APLP1	dis_mo	-0.00159656
CTSA	APOA1BP	dis_mo	-0.497696
GCDH	APOE	dis_po	0.0219563
GPC2	APOE	dis_po	0.046068
GPC3	APOE	dis_mo	-0.0637902
LDLR	APOE	dis_po	0.0812729
LONP1	APOE	dis_po	0.0273975
LOXL4	APOE	dis_mo	-0.0148243
LRP2	APOE	dis_po	0.0320381
LRP8	APOE	dis_mo	-0.120461
MAPT	APOE	dis_mo	-0.0113813
PLTP	APOE	dis_po	0.017989
RHEB	APOE	dis_mo	-0.0264458
STC2	APOE	dis_po	0.0298985
VCAM1	APOE	dis_mo	-0.00385373
VLDLR	APOE	dis_mo	-0.0476166
ACBD6	APP	dis_po	0.0517431
ACO1	APP	dis_po	0.339183
AHSA1	APP	dis_mo	-0.00577178
AIMP2	APP	dis_mo	-0.0104614
ANKS1B	APP	dis_mo	-0.0314027
AP1M2	APP	dis_po	0.0414024
APLP1	APP	dis_po	0.0323295
ARID3B	APP	dis_po	0.0217579
ARMCX3	APP	dis_po	0.0682595
ARPC1B	APP	dis_po	0.00934287
ATP5A1	APP	dis_mo	-0.000477525
BCL11A	APP	dis_mo	-0.0194004
C11orf73	APP	dis_mo	-0.0730667
C19orf33	APP	dis_mo	-0.0496881
C3orf64	APP	dis_po	0.0609211
C7orf50	APP	dis_po	0.0452278
CASP3	APP	dis_po	0.00412703
CD74	APP	dis_po	0.0863081
CDCA3	APP	dis_po	0.0752031
CDCA7	APP	dis_mo	-0.136939
CDK5R1	APP	dis_po	0.177521
CDKN2D	APP	dis_mo	-0.0891498
CENPB	APP	dis_po	0.00631091
CLDN3	APP	dis_po	0.455319
COASY	APP	dis_mo	-0.269486
COL4A6	APP	dis_po	0.0181812
CPE	APP	dis_mo	-0.0382383
CST3	APP	dis_po	0.0354942
CTSB	APP	dis_mo	-0.0320867
DGCR8	APP	dis_mo	-0.135266
DIDO1	APP	dis_mo	-0.0254582
DNALI1	APP	dis_mo	-0.0196755
EBP	APP	dis_mo	-0.0852029
EFS	APP	dis_mo	-0.193717
EIF1	APP	dis_po	0.000711846
EIF3G	APP	dis_mo	-0.000912778
ENO3	APP	dis_mo	-0.0193512
EPB41L2	APP	dis_mo	-0.26676
EPHB4	APP	dis_po	0.00585914
ETV4	APP	dis_po	0.0920249
EXOSC1	APP	dis_mo	-0.0165102
EXOSC3	APP	dis_mo	-0.00372929
FAM64A	APP	dis_mo	-0.112911
FGF12	APP	dis_mo	-0.0251887
GADD45GIP1	APP	dis_po	0.0912136
H2AFY	APP	dis_mo	-0.00305071
HCFC1R1	APP	dis_mo	-0.085224
HMBS	APP	dis_po	0.0447116
HOMER2	APP	dis_mo	-0.0570032
ICAM3	APP	dis_mo	-0.000171658
KCNIP4	APP	dis_po	0.0147254
LARP1B	APP	dis_po	0.0364947
LMCD1	APP	dis_mo	-0.121129
MCM10	APP	dis_po	0.00744908
MED4	APP	dis_po	0.0158858
MEF2D	APP	dis_po	0.0394525
MEST	APP	dis_mo	-0.00735347
MINA	APP	dis_mo	-0.0262955
MND1	APP	dis_mo	-0.0236597
MRAP2	APP	dis_mo	-0.0432992
MRPL11	APP	dis_mo	-0.00367327
MRPL27	APP	dis_po	0.0414856
MRPL49	APP	dis_mo	-0.0161754
MXD1	APP	dis_po	0.0356431
NAE1	APP	dis_po	0.0889845
NAV1	APP	dis_mo	-0.187991
NECAB1	APP	dis_mo	-0.0272765
NGLY1	APP	dis_mo	-0.0177268
NMB	APP	dis_mo	-0.00131962
NOLC1	APP	dis_po	0.00102582
NOP16	APP	dis_po	0.0558487
NR1H3	APP	dis_mo	-0.0328199
NTM	APP	dis_po	0.0637309
NUDT9	APP	dis_po	0.0363553
OTX2	APP	dis_po	0.0356532
PARVA	APP	dis_po	0.00619084
POP7	APP	dis_mo	-0.0113687
PPHLN1	APP	dis_mo	-0.0299869
RAB26	APP	dis_mo	-0.0753041
RAB2B	APP	dis_po	0.0120782
RAB40B	APP	dis_po	0.00611662
RASL12	APP	dis_po	0.0745368
RBPJ	APP	dis_mo	-0.0137826
RCAN1	APP	dis_mo	-0.029408
RFWD3	APP	dis_mo	-0.0185008
RGL1	APP	dis_po	0.0250013
RIT2	APP	dis_mo	-0.507015
RNF138	APP	dis_po	0.0170037
RPL37	APP	dis_po	0.000154733
RPUSD2	APP	dis_mo	-0.0201592
SIRT5	APP	dis_mo	-0.0107266
SIVA1	APP	dis_mo	-0.0534394
SNAP25	APP	dis_mo	-0.0111844
SNURF	APP	dis_mo	-0.0637754
SPG20	APP	dis_mo	-0.0128376
SYVN1	APP	dis_po	0.0154389
TARBP2	APP	dis_po	0.00588608
TNNT2	APP	dis_po	0.0193301
TRAP1	APP	dis_mo	-0.00279087
TRAPPC2L	APP	dis_po	0.0252669
TRPT1	APP	dis_po	0.130349
UBE3C	APP	dis_po	0.0295797
VAPA	APP	dis_mo	-0.0101155
VAT1L	APP	dis_po	0.0832862
WARS	APP	dis_mo	-0.00265178
WIBG	APP	dis_po	0.00892887
ZNF706	APP	dis_mo	-0.0209328
ADSL	APRT	dis_mo	-0.00892278
COQ3	APRT	dis_mo	-0.0873025
IKBKE	APRT	dis_mo	-0.033724
IKBKG	APRT	dis_po	0.0152969
ODC1	APRT	dis_mo	-0.0124532
VCAM1	APRT	dis_po	0.0205188
PQBP1	AQR	dis_po	0.131538
WDR77	AQR	dis_mo	-0.0678465
RHOQ	ARAP3	dis_mo	-0.00111594
ARFGAP3	ARF4	dis_mo	-0.0061611
CADPS2	ARF4	dis_mo	-0.0836151
GRK5	ARF4	dis_po	0.0106991
ILK	ARF4	dis_po	0.0333297
ARF4	ARFGAP3	dis_mo	-0.0061611
CNDP2	ARFGEF1	dis_po	0.0108438
GRTP1	ARFGEF1	dis_mo	-0.0144292
NUP62	ARFGEF1	dis_po	0.00937752
PIGW	ARFGEF1	dis_po	0.0243533
PSMC2	ARFGEF1	dis_po	0.0247221
SCHIP1	ARFGEF1	dis_po	0.0391633
SSB	ARFGEF1	dis_po	0.014102
TMEM30B	ARFGEF1	dis_mo	-0.022228
UBE2J2	ARFGEF1	dis_mo	-0.0157058
PRKAR1A	ARFGEF2	dis_mo	-0.0182138
PSMA4	ARFGEF2	dis_mo	-0.00378091
AP3B1	ARFIP1	dis_mo	-0.0556146
DNM1L	ARFIP1	dis_po	0.124179
IDE	ARFIP1	dis_mo	-0.119741
SHMT2	ARFIP1	dis_po	0.0520392
NTAN1	ARHGAP1	dis_mo	-0.128354
PPAT	ARHGAP1	dis_mo	-0.0334392
PPP4C	ARHGAP1	dis_po	0.0153593
RHOU	ARHGAP1	dis_mo	-0.0153624
SMARCD3	ARHGAP1	dis_po	0.0281771
RHOC	ARHGAP22	dis_po	0.127842
RHOU	ARHGAP22	dis_po	0.0214028
HNRNPA1	ARHGAP23	dis_mo	-0.0138206
RHOC	ARHGAP23	dis_mo	-0.0241333
RHOC	ARHGAP8	dis_po	0.0467047
RHOQ	ARHGAP8	dis_mo	-0.0299959
EWSR1	ARHGDIA	dis_mo	-0.00221418
EZR	ARHGDIA	dis_po	0.00234884
HNRNPA3	ARHGDIA	dis_po	0.0154297
HNRNPAB	ARHGDIA	dis_mo	-0.0327728
SUPT3H	ARHGDIA	dis_mo	-0.00665571
TERF1	ARHGDIA	dis_mo	-0.00888236
TWF2	ARHGDIA	dis_po	0.0091624
CADPS2	ARHGDIB	dis_mo	-0.0211899
CASP3	ARHGDIB	dis_mo	-0.00849717
DOCK2	ARHGDIB	dis_po	0.00149991
HCLS1	ARHGDIB	dis_po	0.0153768
SYK	ARHGDIB	dis_mo	-0.00177228
CTNNAL1	ARHGEF1	dis_po	0.0270335
DUSP3	ARHGEF1	dis_po	0.00302689
DUSP6	ARHGEF1	dis_mo	-0.00158445
GNA12	ARHGEF1	dis_mo	-0.0147985
HRAS	ARHGEF1	dis_po	0.00173869
KIT	ARHGEF1	dis_po	0.0249351
PDGFRB	ARHGEF1	dis_mo	-0.00432032
EGFR	ARHGEF5	dis_mo	-0.142088
EPHB1	ARHGEF5	dis_mo	-0.173904
SEPHS2	ARHGEF5	dis_po	0.102499
APP	ARID3B	dis_po	0.0217579
NACC1	ARID3B	dis_po	0.115149
POU5F1	ARID3B	dis_mo	-0.184308
PARP6	ARIH2	dis_po	0.0035156
RRS1	ARIH2	dis_mo	-0.0156983
UBE2D2	ARIH2	dis_po	0.0129352
PDE6D	ARL3	dis_po	0.0476378
RGS16	ARL3	dis_mo	-0.0218744
RGS4	ARL3	dis_mo	-0.0099584
TLE4	ARL3	dis_po	0.0134064
NUP50	ARL4A	dis_po	0.00123333
C10orf35	ARL6IP5	dis_po	0.0732422
CDH2	ARMCX2	dis_mo	-0.0460571
CELSR2	ARMCX2	dis_po	0.0727894
ACIN1	ARMCX3	dis_mo	-0.0294393
AP3B1	ARMCX3	dis_po	0.0298843
APP	ARMCX3	dis_po	0.0682595
TSEN34	ARMCX3	dis_po	0.0875938
KAT2B	ARNTL	dis_mo	-0.0870097
RARA	ARNTL	dis_po	0.127356
APP	ARPC1B	dis_po	0.00934287
DSTN	ARPC1B	dis_po	0.00443342
GSN	ARPC1B	dis_mo	-0.00222702
HSPB8	ARPC1B	dis_po	0.00931383
IPO11	ARPC1B	dis_mo	-0.0168259
LSM6	ARPC1B	dis_po	0.00623851
STAT6	ARPC1B	dis_po	0.00211624
TOM1L1	ARPC1B	dis_mo	-0.0081154
AARSD1	ARPC2	dis_mo	-0.0126526
APEX1	ARPC2	dis_mo	-0.0158968
ARPC4	ARPC2	dis_po	0.0144261
ARPC5L	ARPC2	dis_mo	-0.07477
AURKA	ARPC2	dis_po	0.0123992
CAPZB	ARPC2	dis_mo	-0.00714728
CCT8	ARPC2	dis_mo	-0.00626886
CDH1	ARPC2	dis_po	0.00711831
CPNE1	ARPC2	dis_po	0.0415914
GFPT2	ARPC2	dis_po	0.00320486
HSD17B12	ARPC2	dis_mo	-0.00541947
MCM4	ARPC2	dis_mo	-0.00606513
RUVBL2	ARPC2	dis_po	0.0062695
SGK	ARPC2	dis_mo	-0.0356727
SLC10A7	ARPC2	dis_mo	-0.202549
STIP1	ARPC2	dis_po	0.00139308
TNPO3	ARPC2	dis_po	0.00156953
ARPC2	ARPC4	dis_po	0.0144261
GFPT2	ARPC4	dis_mo	-0.00113266
METTL1	ARPC4	dis_po	0.0176899
TH1L	ARPC4	dis_po	0.392
TOM1L1	ARPC4	dis_po	7.65935e-05
APEX1	ARPC5	dis_mo	-0.00274134
ARRB1	ARPC5	dis_mo	-0.00150826
CTTN	ARPC5	dis_po	0.017743
EGFR	ARPC5	dis_po	0.0136996
MSN	ARPC5	dis_po	0.00132475
ARPC2	ARPC5L	dis_mo	-0.07477
AP1M2	ARRB1	dis_po	0.105396
AP3B1	ARRB1	dis_po	0.0911808
APLP1	ARRB1	dis_po	0.00370929
ARPC5	ARRB1	dis_mo	-0.00150826
ARRDC3	ARRB1	dis_po	0.0883011
BOP1	ARRB1	dis_mo	-0.000137682
CALD1	ARRB1	dis_po	0.0639674
DDX27	ARRB1	dis_mo	-0.00022026
GSN	ARRB1	dis_po	0.0580877
INA	ARRB1	dis_mo	-0.0537162
MPRIP	ARRB1	dis_po	0.0800562
TMPO	ARRB1	dis_mo	-0.021182
TOP2A	ARRB1	dis_mo	-0.0011456
AP1M2	ARRDC2	dis_mo	-0.281073
ARRB1	ARRDC3	dis_po	0.0883011
KPNA2	ARRDC3	dis_mo	-0.13557
ELAVL1	ARSB	dis_mo	-0.0680869
G3BP1	ASCC3	dis_mo	-0.0026277
JUN	ASCC3	dis_mo	-0.129922
SEH1L	ASCC3	dis_mo	-0.00702745
SKIL	ASCC3	dis_po	0.0631735
BHLHB2	ASCL1	dis_po	0.420782
HES5	ASCL1	dis_mo	-0.0767544
HEY1	ASCL1	dis_mo	-0.130446
MEF2D	ASCL1	dis_po	0.105147
NEUROD1	ASCL1	dis_mo	-0.0563616
OLIG2	ASCL1	dis_po	0.0969078
ATP2C1	ASF1A	dis_po	0.00497534
AURKB	ASF1A	dis_po	0.00135846
CHAF1B	ASF1A	dis_po	0.0197972
HIST1H2AC	ASF1A	dis_mo	-0.00688083
HTATIP2	ASF1A	dis_mo	-0.077025
NASP	ASF1A	dis_mo	-0.040501
POLE	ASF1A	dis_mo	-4.58844e-05
RFC2	ASF1A	dis_po	0.00389832
SUPT16H	ASF1A	dis_po	0.00180489
UBA3	ASF1A	dis_po	0.0408412
UCHL3	ASF1A	dis_po	0.162388
WDR5	ASF1A	dis_po	0.00121654
YEATS4	ASF1A	dis_po	0.000586769
CHEK2	ASF1B	dis_mo	-0.0112964
CSNK2A1	ASF1B	dis_po	0.0249677
IDH1	ASF1B	dis_po	6.36392e-05
MCM6	ASF1B	dis_po	0.0226371
MRPS7	ASF1B	dis_po	0.198613
PSPH	ASF1B	dis_po	0.0363445
SUPT16H	ASF1B	dis_po	0.0160672
ERBB2	ASGR1	dis_mo	-0.0210484
HSP90AA1	ASGR1	dis_po	0.0378421
LYN	ASGR1	dis_mo	-0.00531769
PLTP	ASGR1	dis_mo	-0.0319166
SYVN1	ASGR1	dis_po	0.0221914
DCPS	ASNS	dis_po	0.00214023
DCUN1D1	ASNS	dis_po	0.00281807
HSP90AA1	ASNS	dis_po	0.0145081
PSMD4	ASNS	dis_mo	-0.0194595
RPS6KA1	ASPM	dis_mo	-0.0266352
ABAT	ASS1	dis_mo	-0.118514
BCAT1	ASS1	dis_po	0.00532638
CTSA	ASS1	dis_po	0.00373865
GSS	ASS1	dis_mo	-0.0070476
MT2A	ASS1	dis_po	0.00931169
MVD	ASS1	dis_mo	-0.0110105
NANS	ASS1	dis_mo	-0.242357
PSMD4	ASS1	dis_po	0.00131197
ERBB2	ATAD3A	dis_po	0.0320541
FYN	ATAD3A	dis_po	0.000500098
BCL6	ATF3	dis_po	0.017749
HDAC3	ATF3	dis_po	0.0192629
HDAC6	ATF3	dis_mo	-0.0140155
HHEX	ATF3	dis_mo	-0.471862
MAF	ATF3	dis_mo	-0.120541
MDM2	ATF3	dis_po	0.00594332
RIF1	ATF3	dis_po	0.0068886
SMAD3	ATF3	dis_po	0.000137668
EGLN3	ATF4	dis_mo	-0.0755518
GTF2F2	ATF4	dis_mo	-0.0311275
KAT2B	ATF4	dis_po	0.0518326
TRIB3	ATF4	dis_mo	-0.0411467
TRIM24	ATF4	dis_po	0.0661814
CEBPD	ATF5	dis_mo	-0.0882316
TRIB3	ATF5	dis_mo	-0.0131046
WFS1	ATF6	dis_po	0.0781553
ACADM	ATG16L1	dis_po	0.0365574
AIFM1	ATG16L1	dis_mo	-0.00355827
AP2M1	ATG16L1	dis_mo	-0.000306996
DAZAP1	ATG16L1	dis_po	0.00863119
HNRNPD	ATG16L1	dis_po	0.00183946
HSP90B1	ATG16L1	dis_mo	-0.0172525
HSPA4L	ATG16L1	dis_mo	-0.0368328
LARS	ATG16L1	dis_po	0.00607113
MATR3	ATG16L1	dis_mo	-0.0046911
SNRPB	ATG16L1	dis_po	0.00736399
TYSND1	ATG16L1	dis_mo	-0.0203413
ACTB	ATG3	dis_mo	-0.00808288
CCBL2	ATG3	dis_mo	-0.0324193
CCT8	ATG3	dis_mo	-0.00792503
LGALS3BP	ATG3	dis_mo	-0.0134121
NANS	ATG3	dis_po	0.502399
RPL8	ATG3	dis_po	0.00198011
SEC11C	ATG3	dis_mo	-0.0138813
SSB	ATG3	dis_po	0.00253147
TRIP10	ATG3	dis_po	0.0162254
AFG3L2	ATG4C	dis_mo	-0.0157613
AIFM1	ATG4C	dis_po	0.0341523
CA2	ATG4C	dis_po	0.00328665
CCBL2	ATG4C	dis_mo	-0.0865267
CCT8	ATG4C	dis_mo	-0.00457858
CKB	ATG4C	dis_mo	-0.0081114
GSTP1	ATG4C	dis_mo	-0.00529219
HJURP	ATG4C	dis_mo	-0.0688295
PHGDH	ATG4C	dis_po	0.00132633
PPM1G	ATG4C	dis_po	0.00357348
PSMA5	ATG4C	dis_mo	-0.000310083
RUVBL2	ATG4C	dis_mo	-0.00128534
SLC25A4	ATG4C	dis_mo	-0.0152643
SLC3A2	ATG4C	dis_mo	-0.0102054
TIMM23	ATG4C	dis_mo	-0.117025
TTC27	ATG4C	dis_po	0.0015892
ADI1	ATIC	dis_po	0.000398724
CTH	ATIC	dis_mo	-0.00769555
CYP51A1	ATIC	dis_po	0.0150678
MSN	ATIC	dis_mo	-0.000375035
OGFOD1	ATIC	dis_mo	-0.0245923
PGM1	ATIC	dis_mo	-0.00795113
SOD1	ATIC	dis_mo	-0.0196144
EGFR	ATP1B1	dis_mo	-0.0660847
ELAVL1	ATP1B1	dis_mo	-0.117046
BRCA1	ATP1B3	dis_mo	-0.0577539
GJA1	ATP1B3	dis_mo	-0.0553933
BCL2	ATP2A2	dis_mo	-0.0575614
ITPR3	ATP2A2	dis_po	0.0660072
KIT	ATP2A2	dis_po	0.00198204
PDGFRB	ATP2A2	dis_mo	-0.0871017
RABGGTB	ATP2A2	dis_po	0.00131873
TMX1	ATP2A2	dis_po	0.189567
EGFR	ATP2A3	dis_mo	-0.0302708
CALCA	ATP2B4	dis_mo	-0.0189342
CDK7	ATP2B4	dis_po	0.00125678
EGFR	ATP2B4	dis_po	0.0169739
AFG3L2	ATP2C1	dis_po	0.00573556
ASF1A	ATP2C1	dis_po	0.00497534
ELAVL1	ATP2C1	dis_mo	-0.00432672
FEN1	ATP2C1	dis_po	0.00228423
MOGS	ATP2C1	dis_mo	-0.0245607
PHB	ATP2C1	dis_po	0.00394458
PIGW	ATP2C1	dis_mo	-0.015639
SGPP2	ATP2C1	dis_po	0.0405539
SOD1	ATP2C1	dis_po	0.014732
TALDO1	ATP2C1	dis_mo	-0.0183794
VPS4B	ATP2C1	dis_po	0.00278062
APP	ATP5A1	dis_mo	-0.000477525
ATP5D	ATP5A1	dis_mo	-0.13951
ATP5H	ATP5A1	dis_mo	-0.122275
ATP6V0C	ATP5A1	dis_mo	-0.00266043
ATP6V1A	ATP5A1	dis_po	0.00689573
CHN2	ATP5A1	dis_po	0.00346124
HIST1H2AC	ATP5A1	dis_mo	-0.000902242
MAPK13	ATP5A1	dis_po	0.00602508
MLH1	ATP5A1	dis_po	0.01896
NARS	ATP5A1	dis_mo	-0.00249768
PLK4	ATP5A1	dis_po	0.00136994
STOML2	ATP5A1	dis_mo	-0.0184827
SUCLA2	ATP5A1	dis_mo	-0.00654169
TFDP1	ATP5A1	dis_po	0.00942041
TNPO3	ATP5A1	dis_po	0.00652779
ATP5A1	ATP5D	dis_mo	-0.13951
ATP5J2	ATP5D	dis_mo	-0.0745456
MYC	ATP5D	dis_po	0.00705328
SH3GL3	ATP5D	dis_po	0.0854656
ATP5H	ATP5G1	dis_mo	-0.0591911
ATP5A1	ATP5H	dis_mo	-0.122275
ATP5G1	ATP5H	dis_mo	-0.0591911
ATP5J2	ATP5H	dis_po	0.0521159
STOML2	ATP5H	dis_po	0.0529852
ATP5D	ATP5J2	dis_mo	-0.0745456
ATP5H	ATP5J2	dis_po	0.0521159
MYC	ATP5J2	dis_mo	-0.0196797
UQCRQ	ATP5J2	dis_po	0.122271
AP3D1	ATP6V0A1	dis_po	0.0128145
ATP6V0C	ATP6V0A1	dis_mo	-0.0164076
HSP90AA1	ATP6V0A1	dis_mo	-0.0349137
MRPL46	ATP6V0A1	dis_mo	-0.0586154
MRPL50	ATP6V0A1	dis_mo	-0.0168913
PA2G4	ATP6V0A1	dis_po	0.0291541
PFKP	ATP6V0A1	dis_mo	-0.00477022
PUS7	ATP6V0A1	dis_po	0.0167898
SLC30A5	ATP6V0A1	dis_mo	-0.0155274
SYP	ATP6V0A1	dis_po	0.0364711
ATP5A1	ATP6V0C	dis_mo	-0.00266043
ATP6V0A1	ATP6V0C	dis_mo	-0.0164076
ATP6V1A	ATP6V0C	dis_mo	-0.00850669
GUF1	ATP6V0C	dis_po	0.0491291
PELO	ATP6V0C	dis_po	0.00193832
SYP	ATP6V0C	dis_mo	-0.0277035
TARBP2	ATP6V0C	dis_po	0.0271088
TRMT1	ATP6V0C	dis_mo	-0.0172241
UBE2V2	ATP6V0C	dis_po	0.00909041
ATP6V1A	ATP6V0D1	dis_mo	-0.156348
CDC123	ATP6V0D1	dis_po	0.0253776
NARS	ATP6V0D1	dis_po	0.00802977
PFDN5	ATP6V0D1	dis_mo	-0.0144202
SIRT5	ATP6V0D1	dis_mo	-0.00164539
ATP5A1	ATP6V1A	dis_po	0.00689573
ATP6V0C	ATP6V1A	dis_mo	-0.00850669
ATP6V0D1	ATP6V1A	dis_mo	-0.156348
CD9	ATP6V1A	dis_po	0.0466492
CSE1L	ATP6V1A	dis_mo	-0.00233334
ERCC1	ATP6V1A	dis_mo	-0.0333221
GGH	ATP6V1A	dis_po	0.00210718
LAMP1	ATP6V1A	dis_po	0.00224566
MITD1	ATP6V1A	dis_mo	-0.0243148
MSLN	ATP6V1A	dis_po	0.0476913
RAB22A	ATP6V1A	dis_mo	-0.193349
RALB	ATP6V1A	dis_po	0.0790555
TXNDC17	ATP6V1A	dis_mo	-0.0475296
ZNF706	ATP6V1A	dis_po	0.0157494
LAMP1	ATP6V1B1	dis_po	0.0194548
MYO1D	ATP6V1B1	dis_mo	-0.00105408
RAB22A	ATP6V1B1	dis_mo	-0.181641
RALB	ATP6V1B1	dis_po	1.49499
SCARB2	ATP6V1B1	dis_mo	-0.1181
TFRC	ATP6V1B1	dis_po	0.0137118
ARPC2	AURKA	dis_po	0.0123992
CDC16	AURKA	dis_po	0.00620513
DCTN3	AURKA	dis_mo	-0.00846338
DKC1	AURKA	dis_mo	-0.0142695
DYNLL1	AURKA	dis_po	0.0103768
FABP5	AURKA	dis_po	0.0439081
HSP90AA1	AURKA	dis_mo	-0.00061678
JTB	AURKA	dis_po	0.0737875
KIF11	AURKA	dis_mo	-0.00512911
MAPRE3	AURKA	dis_mo	-0.0637346
NIN	AURKA	dis_mo	-0.0911066
PTTG1	AURKA	dis_po	0.039153
TUBB	AURKA	dis_mo	-0.00205824
WRN	AURKA	dis_po	0.0233968
APITD1	AURKB	dis_po	0.00937742
ASF1A	AURKB	dis_po	0.00135846
AXIN2	AURKB	dis_po	0.0643641
BUB3	AURKB	dis_mo	-0.00161484
CBX3	AURKB	dis_mo	-0.000309878
CDC16	AURKB	dis_po	0.00641129
CDC26	AURKB	dis_po	0.0150155
CDCA8	AURKB	dis_mo	-0.0102944
CIB1	AURKB	dis_mo	-0.00849912
DKC1	AURKB	dis_po	0.00750103
DTL	AURKB	dis_mo	-0.00490646
ILK	AURKB	dis_mo	-0.00393941
ITGB3BP	AURKB	dis_po	0.00767098
MAPRE3	AURKB	dis_mo	-0.1458
MCM2	AURKB	dis_po	0.00230645
MLF1IP	AURKB	dis_mo	-0.00182306
NUDC	AURKB	dis_po	0.0149858
PTTG1	AURKB	dis_po	0.000247354
BCL2	AVEN	dis_po	0.0448926
AURKB	AXIN2	dis_po	0.0643641
CAMK2D	AXIN2	dis_mo	-0.0418181
ENC1	AXIN2	dis_po	0.137911
FHL2	AXIN2	dis_po	0.0142103
KLHL28	AXIN2	dis_mo	-0.11081
RALGPS2	AXIN2	dis_mo	-0.0970755
RASL12	AXIN2	dis_mo	-0.0339347
RNF14	AXIN2	dis_mo	-0.0129305
STIP1	AXIN2	dis_po	0.0484069
C1GALT1C1	B3GNT2	dis_mo	-0.17155
BCL2L1	BAD	dis_po	0.0051926
BID	BAD	dis_mo	-0.00184836
KEAP1	BAD	dis_mo	-0.00318528
S100A10	BAD	dis_mo	-0.0505467
YWHAB	BAD	dis_mo	-0.0223392
ACVR1	BAMBI	dis_po	0.00572762
EHMT2	BANF1	dis_po	0.010469
HNRNPD	BANF1	dis_po	0.00412176
NUP107	BANF1	dis_po	0.0048326
PPP2CA	BANF1	dis_po	0.000853716
SET	BANF1	dis_mo	-0.00276556
TLE1	BARHL1	dis_po	0.0376366
BOK	BAX	dis_po	0.0178277
CASP9	BAX	dis_po	0.0266582
IRF3	BAX	dis_po	0.0364563
PYCARD	BAX	dis_po	0.0351315
SLC25A4	BAX	dis_mo	-0.00941445
TOMM22	BAX	dis_po	0.0272017
XRCC6	BAX	dis_po	0.00246381
ELAVL1	BAZ1A	dis_po	0.0187578
GRK5	BAZ1A	dis_mo	-0.0122558
ELAVL1	BAZ2B	dis_po	0.0512008
BBS2	BBS1	dis_po	0.0114001
BBS4	BBS1	dis_mo	-0.00670503
CALCA	BBS1	dis_mo	-0.170542
EEF1A1	BBS1	dis_po	0.00933499
KEAP1	BBS1	dis_po	0.00506038
OSBPL10	BBS1	dis_mo	-0.00896083
ACY1	BBS2	dis_po	0.0798845
BBS1	BBS2	dis_po	0.0114001
BBS4	BBS2	dis_po	0.0144498
EEF1A1	BBS2	dis_po	0.0252617
FHOD1	BBS2	dis_mo	-0.0778089
PSME3	BBS2	dis_mo	-0.0267971
ACTB	BBS4	dis_mo	-0.0194125
ACY1	BBS4	dis_mo	-0.585422
BBS1	BBS4	dis_mo	-0.00670503
BBS2	BBS4	dis_po	0.0144498
CALCA	BBS4	dis_po	0.00261975
DCTN1	BBS4	dis_po	0.00307139
EEF1A1	BBS4	dis_po	0.0315066
FHOD1	BBS4	dis_po	0.0622839
CTPS	BCAR1	dis_po	0.00494358
EFS	BCAR1	dis_po	0.207428
EVL	BCAR1	dis_mo	-0.00342205
GRB10	BCAR1	dis_po	0.000664778
MAG	BCAR1	dis_mo	-0.0204772
NEDD9	BCAR1	dis_po	0.00859086
PPAP2B	BCAR1	dis_mo	-0.000690431
PTPN6	BCAR1	dis_po	0.0319881
RAPGEF1	BCAR1	dis_mo	-0.00899611
SHC1	BCAR1	dis_po	0.000252167
SNRPD1	BCAR1	dis_po	0.000129961
TSEN34	BCAR1	dis_po	0.0947803
GOT2	BCAR3	dis_po	0.00439587
IARS	BCAR3	dis_mo	-0.000255867
KPNA2	BCAR3	dis_po	0.00220829
MRPL12	BCAR3	dis_mo	-0.00288675
RPS7	BCAR3	dis_po	0.00103709
SET	BCAR3	dis_mo	-0.00235106
ASS1	BCAT1	dis_po	0.00532638
HSP90AA1	BCAT1	dis_mo	-0.0128507
PSAT1	BCAT1	dis_po	0.00470279
PUS1	BCAT1	dis_mo	-0.0243991
SERPINE2	BCAT1	dis_po	0.099926
TP53I3	BCAT1	dis_po	0.0602224
CSE1L	BCCIP	dis_po	0.012208
EIF5A	BCCIP	dis_mo	-0.0308133
GNL3	BCCIP	dis_mo	-0.0144018
GRWD1	BCCIP	dis_po	0.0207215
APP	BCL11A	dis_mo	-0.0194004
CDCA3	BCL11A	dis_mo	-0.0279177
ATP2A2	BCL2	dis_mo	-0.0575614
AVEN	BCL2	dis_po	0.0448926
BID	BCL2	dis_mo	-0.00328414
BNIPL	BCL2	dis_po	0.0433751
CPT1A	BCL2	dis_mo	-0.0840275
DUSP6	BCL2	dis_po	0.039911
DYNLL1	BCL2	dis_po	0.0262106
HSPA9	BCL2	dis_mo	-0.0201974
IKBKG	BCL2	dis_po	0.0018181
KEAP1	BCL2	dis_po	0.0202991
MOAP1	BCL2	dis_po	0.0328016
PMAIP1	BCL2	dis_po	0.0210821
RHEB	BCL2	dis_mo	-0.0174078
RPS6KA2	BCL2	dis_po	0.00787599
TMBIM6	BCL2	dis_mo	-0.0378292
BAD	BCL2L1	dis_po	0.0051926
BCL2L12	BCL2L1	dis_po	0.0925903
BNIP3L	BCL2L1	dis_mo	-0.0133577
CASP3	BCL2L1	dis_po	0.00287788
CASP9	BCL2L1	dis_po	0.00254249
DNM1L	BCL2L1	dis_mo	-0.00840923
DYNLL1	BCL2L1	dis_mo	-0.0217972
LARP1	BCL2L1	dis_po	0.0676393
PPHLN1	BCL2L1	dis_po	0.0156554
RTN1	BCL2L1	dis_po	0.0213975
TLE1	BCL2L1	dis_mo	-0.0132913
BCL2L1	BCL2L12	dis_po	0.0925903
HSPA4	BCL2L12	dis_po	0.546846
RTN1	BCL2L12	dis_mo	-0.0686243
ATF3	BCL6	dis_po	0.017749
HSP90AA1	BCL6	dis_mo	-0.00634802
LSM1	BCL6	dis_mo	-0.0107668
MAPK8IP3	BCL6	dis_po	0.00778318
NACC1	BCL6	dis_po	0.0299
PIAS2	BCL6	dis_mo	-0.0372193
RUNX1T1	BCL6	dis_po	0.00500799
SKP1	BCL6	dis_mo	-0.0201475
TRIB3	BCL6	dis_po	0.0249865
ZBTB16	BCL6	dis_mo	-0.0536271
EGFR	BCLAF1	dis_mo	-0.122553
MCM7	BCLAF1	dis_mo	-0.0346837
SFPQ	BCLAF1	dis_mo	-0.00825933
SNRPB2	BCLAF1	dis_po	0.0103548
SOCS1	BCLAF1	dis_mo	-0.0198657
HDAC6	BDH1	dis_po	0.0154778
SALL4	BEND3	dis_po	0.038261
CHPF	BGN	dis_mo	-0.0429758
CHST13	BGN	dis_po	0.0318911
CHST3	BGN	dis_po	0.0815846
COL1A1	BGN	dis_po	0.0279906
GDF15	BGN	dis_po	0.111058
IGFBP3	BGN	dis_po	0.0372079
IGFBP5	BGN	dis_mo	-0.0289482
IGFBP6	BGN	dis_mo	-0.172646
UST	BGN	dis_po	0.0850721
VWF	BGN	dis_mo	-0.0855028
ASCL1	BHLHB2	dis_po	0.420782
HEY1	BHLHB2	dis_mo	-0.112175
BAD	BID	dis_mo	-0.00184836
BCL2	BID	dis_mo	-0.00328414
IKBKG	BID	dis_po	0.00591347
TUBB2B	BID	dis_po	0.00538896
ITGA6	BIN1	dis_mo	-0.00743098
RBM12	BIN1	dis_mo	-0.0715354
RIN2	BIN1	dis_mo	-0.0199978
SH3GL3	BIN1	dis_po	0.00215471
SYNJ1	BIN1	dis_mo	-0.00483545
ZBTB3	BIN1	dis_mo	-0.00379295
BUB3	BIRC5	dis_po	0.00818048
CENPK	BIRC5	dis_po	0.00154721
CENPN	BIRC5	dis_po	0.00239352
JTB	BIRC5	dis_mo	-0.0320388
MLF1IP	BIRC5	dis_po	0.00051323
EXO1	BLM	dis_mo	-0.0110705
HSP90AA1	BLM	dis_mo	-0.0030119
MCM2	BLM	dis_mo	-0.000793802
MYBL2	BLM	dis_mo	-0.0313255
RAD54L	BLM	dis_mo	-0.016197
RIF1	BLM	dis_po	0.0125256
SF3B2	BLM	dis_po	0.00959521
U2AF1	BLM	dis_mo	-0.00407787
WRN	BLM	dis_po	0.0113265
BMP7	BMP6	dis_mo	-0.0106808
BMPR1A	BMP6	dis_mo	-0.00205971
SOSTDC1	BMP6	dis_mo	-0.096022
ACVR2A	BMP7	dis_po	0.0343036
BMP6	BMP7	dis_mo	-0.0106808
BMPR1A	BMP7	dis_mo	-0.0195709
CDC25A	BMP7	dis_po	0.0106301
CKS1B	BMP7	dis_mo	-0.0681438
SIRT5	BMP7	dis_mo	-0.0157419
SOSTDC1	BMP7	dis_mo	-0.0492906
UNC5D	BMP7	dis_mo	-0.0188855
ACVR2A	BMPR1A	dis_mo	-0.00831843
BMP6	BMPR1A	dis_mo	-0.00205971
BMP7	BMPR1A	dis_mo	-0.0195709
BMPR2	BMPR1A	dis_mo	-0.00506666
MAP3K7IP1	BMPR1A	dis_po	0.0532969
MYC	BMPR1A	dis_mo	-0.00377486
SMAD7	BMPR1A	dis_mo	-0.00650822
ACVR1B	BMPR2	dis_mo	-0.0452631
BMPR1A	BMPR2	dis_mo	-0.00506666
DYNLT1	BMPR2	dis_po	0.0242135
FRS3	BMPR2	dis_mo	-0.00761231
LSM10	BMPR2	dis_mo	-0.0938369
NOP56	BMPR2	dis_mo	-0.0167048
BCL2L1	BNIP3L	dis_mo	-0.0133577
CLN8	BNIP3L	dis_po	0.0114986
BCL2	BNIPL	dis_po	0.0433751
NME2	BNIPL	dis_po	0.0184239
BAX	BOK	dis_po	0.0178277
ARRB1	BOP1	dis_mo	-0.000137682
CDC16	BOP1	dis_po	0.00264619
CEBPZ	BOP1	dis_po	0.000125665
DDX18	BOP1	dis_mo	-0.00087617
DDX54	BOP1	dis_mo	-0.0114405
EBNA1BP2	BOP1	dis_po	0.0149596
MRTO4	BOP1	dis_po	0.00377345
PAK1IP1	BOP1	dis_mo	-0.00870641
PELP1	BOP1	dis_mo	-0.0311877
PWP1	BOP1	dis_po	0.00616953
SHMT2	BOP1	dis_po	0.0164157
SNX5	BOP1	dis_po	0.220815
VAPA	BOP1	dis_mo	-0.0101899
WDR12	BOP1	dis_mo	-0.0446065
KEAP1	BPTF	dis_mo	-0.118473
SMAD3	BPTF	dis_mo	-0.0145266
SRPK1	BPTF	dis_po	0.088708
ACVR1B	BRCA1	dis_mo	-0.00501734
ATP1B3	BRCA1	dis_mo	-0.0577539
BRCC3	BRCA1	dis_po	0.209235
BRMS1	BRCA1	dis_mo	-0.00303923
CABYR	BRCA1	dis_po	0.154331
CAPZB	BRCA1	dis_mo	-0.0190727
CASP3	BRCA1	dis_po	0.0055014
CDC25C	BRCA1	dis_mo	-0.0207107
CDK7	BRCA1	dis_mo	-0.0245044
CDKN2D	BRCA1	dis_mo	-0.0268028
CDS1	BRCA1	dis_po	0.0679953
CHEK2	BRCA1	dis_mo	-0.00106292
EIF4G1	BRCA1	dis_mo	-0.00978753
EIF5B	BRCA1	dis_mo	-0.00705406
FBXO5	BRCA1	dis_mo	-0.0139988
FNBP1	BRCA1	dis_po	0.0053643
GTF2E1	BRCA1	dis_mo	-0.0257296
HMMR	BRCA1	dis_po	0.0182242
KIAA0101	BRCA1	dis_po	0.0361034
LDB2	BRCA1	dis_po	0.0238521
LMO4	BRCA1	dis_po	0.0580549
RBBP8	BRCA1	dis_mo	-0.0184954
REV1	BRCA1	dis_mo	-0.121645
SNRNP200	BRCA1	dis_po	0.00583365
TARS	BRCA1	dis_po	0.00181108
TATDN2	BRCA1	dis_mo	-0.10066
TRIM24	BRCA1	dis_po	0.0155557
TSEN54	BRCA1	dis_po	0.019178
UBE2J1	BRCA1	dis_po	0.0767461
BRCA1	BRCC3	dis_po	0.209235
CD2AP	BRCC3	dis_mo	-0.12777
MCM2	BRCC3	dis_po	0.217681
WDHD1	BRCC3	dis_mo	-0.152998
CYB5R2	BRIX1	dis_po	0.0104634
DDX18	BRIX1	dis_mo	-0.00496
DHX15	BRIX1	dis_mo	-0.00584446
HSP90AA1	BRIX1	dis_po	0.000140853
LYAR	BRIX1	dis_mo	-0.00380787
OSBP2	BRIX1	dis_mo	-0.00200619
RRP12	BRIX1	dis_po	0.00389279
TUBB3	BRIX1	dis_po	0.00106141
BRCA1	BRMS1	dis_mo	-0.00303923
CHAF1B	BRMS1	dis_mo	-0.000169515
CSNK2A1	BRMS1	dis_po	0.00261479
HDAC3	BRMS1	dis_mo	-0.00310286
C5orf62	BSCL2	dis_mo	-0.0426679
LMO3	BSCL2	dis_po	0.0484511
HOMER1	BSN	dis_mo	-0.701133
YWHAB	BSN	dis_mo	-0.0967951
CDC20	BTRC	dis_mo	-0.0036687
CHPF	BTRC	dis_po	0.515767
DLGAP5	BTRC	dis_po	0.0301728
FBXO5	BTRC	dis_mo	-0.0289796
FGD3	BTRC	dis_mo	-0.0368677
GLI2	BTRC	dis_po	0.188644
HEY2	BTRC	dis_po	0.378712
HSP90AA1	BTRC	dis_po	0.00642876
PSMD4	BTRC	dis_po	0.00925083
SERPINB4	BTRC	dis_mo	-0.00471188
TRIB2	BTRC	dis_po	0.0180059
ZC3H12A	BTRC	dis_po	0.0153556
AP3B1	BUB1	dis_mo	-0.0399641
CDCA5	BUB1	dis_mo	-0.00743564
CENPH	BUB1	dis_mo	-0.0272311
DSN1	BUB1	dis_po	0.0152142
ESPL1	BUB1	dis_po	0.00351104
MBIP	BUB1	dis_mo	-0.0177915
NUDC	BUB1	dis_po	0.00555401
PDGFRB	BUB1	dis_po	0.00312275
RAD54L	BUB1	dis_po	0.00521387
SIRT5	BUB1	dis_po	0.0165526
STAT1	BUB1	dis_mo	-0.00427401
SUPT3H	BUB1	dis_mo	-0.00553264
SVIL	BUB1	dis_mo	-0.0280249
ZWILCH	BUB1	dis_mo	-0.00780299
AP3B1	BUB1B	dis_mo	-0.0714431
CCNB1	BUB1B	dis_mo	-0.000331381
CDCA8	BUB1B	dis_mo	-0.00542244
MAD2L1BP	BUB1B	dis_po	0.00377578
NUDC	BUB1B	dis_po	0.000985549
SGOL2	BUB1B	dis_mo	-0.0156654
SPC25	BUB1B	dis_po	0.00664303
TRIM33	BUB1B	dis_mo	-0.00261806
AURKB	BUB3	dis_mo	-0.00161484
BIRC5	BUB3	dis_po	0.00818048
CCNB1	BUB3	dis_po	0.00189438
CDC16	BUB3	dis_mo	-0.00375846
CPNE1	BUB3	dis_po	0.0108312
SPC25	BUB3	dis_mo	-0.0140797
ZNF207	BUB3	dis_mo	-0.0848536
ZWILCH	BUB3	dis_po	0.00113553
MLH1	C10orf2	dis_po	0.219547
ARL6IP5	C10orf35	dis_po	0.0732422
CDC16	C11orf51	dis_mo	-0.091308
APP	C11orf73	dis_mo	-0.0730667
HSPA8	C11orf73	dis_po	0.0296985
EGFR	C11orf84	dis_po	0.048976
TUBB3	C14orf147	dis_mo	-0.0786308
ABCF1	C14orf166	dis_mo	-0.0180015
NIN	C14orf166	dis_po	0.0424794
PRKDC	C14orf166	dis_po	0.00110373
RFC4	C14orf166	dis_po	0.0143542
VCL	C14orf166	dis_po	0.0343582
PDLIM7	C16orf48	dis_po	0.0498287
APP	C19orf33	dis_mo	-0.0496881
C1GALT1C1	C1GALT1	dis_mo	-0.226663
MUC4	C1GALT1	dis_po	0.0183788
B3GNT2	C1GALT1C1	dis_mo	-0.17155
C1GALT1	C1GALT1C1	dis_mo	-0.226663
MUC4	C1GALT1C1	dis_po	0.487491
CSDA	C1QBP	dis_mo	-0.00774619
DUSP16	C1QBP	dis_mo	-0.00189413
FBXO33	C1QBP	dis_mo	-0.0895142
FYTTD1	C1QBP	dis_mo	-0.0828235
HNRNPD	C1QBP	dis_mo	-0.00110916
MRPL12	C1QBP	dis_mo	-0.00935091
MRPL18	C1QBP	dis_po	0.000264777
MRPS28	C1QBP	dis_mo	-0.00347704
PPP2R2B	C1QBP	dis_po	0.00311841
RASSF2	C1QBP	dis_po	0.0132832
SQSTM1	C1QBP	dis_po	0.000378086
TRAP1	C1QBP	dis_mo	-0.00460493
COL1A1	C1S	dis_mo	-0.507
SERPINB4	C1S	dis_po	0.0103451
SPARC	C1S	dis_po	1.39118
PRMT6	C1orf135	dis_po	0.0740015
ELAVL1	C20orf11	dis_po	0.0958428
HSPD1	C20orf11	dis_mo	-0.027485
MAEA	C20orf11	dis_po	0.399641
MKLN1	C20orf11	dis_mo	-0.0782405
RNPS1	C20orf11	dis_mo	-0.0534905
FANCI	C20orf24	dis_po	0.0070357
MRPL41	C20orf24	dis_po	0.0178773
PHLDA3	C20orf24	dis_mo	-0.0374409
LYN	C2orf47	dis_po	0.015769
AKAP1	C3orf15	dis_po	0.00157717
APP	C3orf64	dis_po	0.0609211
MLH1	C3orf75	dis_mo	-0.11823
ELAVL1	C4orf34	dis_po	0.0115336
BSCL2	C5orf62	dis_mo	-0.0426679
ELAVL1	C6orf106	dis_po	0.0387354
GSTK1	C6orf211	dis_po	0.0290228
SOD2	C7orf20	dis_po	0.0135707
OPCML	C7orf25	dis_po	0.00190982
SF3B2	C7orf25	dis_mo	-0.0274216
TUBB2A	C7orf25	dis_mo	-0.247485
TPD52L1	C7orf36	dis_po	0.159858
VIM	C7orf36	dis_mo	-0.00491035
APP	C7orf50	dis_po	0.0452278
CCDC85B	C7orf50	dis_mo	-0.00955654
LYAR	C7orf50	dis_po	0.00179277
PRNP	C7orf50	dis_mo	-0.0239691
FGFR3	C9orf114	dis_po	0.000446321
ELAVL1	C9orf91	dis_mo	-0.03363
ATG4C	CA2	dis_po	0.00328665
DYNLL1	CA2	dis_po	0.0585949
PCNA	CA2	dis_po	0.0710677
STOM	CA2	dis_po	0.0339293
TRAK2	CA2	dis_mo	-0.0254359
BRCA1	CABYR	dis_po	0.154331
NCAM1	CACNB3	dis_po	0.0639556
YWHAB	CACNB3	dis_mo	-0.200114
TJP2	CACNG2	dis_mo	-0.0345659
UNC5D	CACNG2	dis_mo	-0.0679683
AARS	CACYBP	dis_mo	-0.01212
EIF6	CACYBP	dis_po	0.0311372
IPO11	CACYBP	dis_mo	-0.0464162
METTL1	CACYBP	dis_mo	-0.0143272
MPG	CACYBP	dis_po	0.0316598
S100A6	CACYBP	dis_po	0.272707
ARF4	CADPS2	dis_mo	-0.0836151
ARHGDIB	CADPS2	dis_mo	-0.0211899
MEGF10	CADPS2	dis_mo	-0.0280083
UBE2D2	CADPS2	dis_po	0.0783528
KCNIP4	CALB2	dis_mo	-0.0438968
ADM	CALCA	dis_mo	-0.0399255
ADM2	CALCA	dis_po	0.0620182
ADORA2B	CALCA	dis_po	0.135227
ATP2B4	CALCA	dis_mo	-0.0189342
BBS1	CALCA	dis_mo	-0.170542
BBS4	CALCA	dis_po	0.00261975
ARRB1	CALD1	dis_po	0.0639674
EPB41L2	CALD1	dis_po	0.0186905
MYC	CALD1	dis_mo	-0.0577208
AARSD1	CALR	dis_po	0.0184619
LCK	CALR	dis_mo	-0.00277516
NKX2-1	CALR	dis_mo	-0.0934875
NSUN2	CALR	dis_po	0.00086235
RAN	CALR	dis_mo	-0.0145265
TAP1	CALR	dis_po	0.0268656
ZMPSTE24	CALR	dis_mo	-0.0118873
CDC123	CAMK1D	dis_mo	-0.460267
HSP90AA1	CAMK1D	dis_mo	-0.00318717
HSPD1	CAMK1D	dis_mo	-0.00594478
MARS	CAMK1D	dis_mo	-0.00193317
MTRF1L	CAMK1D	dis_mo	-0.100352
PCSK9	CAMK1D	dis_po	0.0678326
PCYT2	CAMK1D	dis_po	0.0394915
PHGDH	CAMK1D	dis_mo	-0.00373777
SFXN5	CAMK1D	dis_mo	-0.0451915
TOMM70A	CAMK1D	dis_mo	-0.0102305
USP14	CAMK1D	dis_mo	-0.00688477
AXIN2	CAMK2D	dis_mo	-0.0418181
HSP90AA1	CAMK2D	dis_po	0.0108333
RRAS	CAMK2D	dis_po	0.026894
SMAD3	CAMK2D	dis_mo	-0.00230068
WASF3	CAMK2D	dis_mo	-0.0879204
ELAVL1	CAMK2N1	dis_mo	-0.0896797
PDGFRB	CAPN12	dis_mo	-0.0429418
SYK	CAPN12	dis_po	0.0580075
MLH1	CAPN5	dis_po	0.000250529
SLC9A3R1	CAPN6	dis_mo	-0.00778238
ARPC2	CAPZB	dis_mo	-0.00714728
BRCA1	CAPZB	dis_mo	-0.0190727
GABARAPL2	CAPZB	dis_mo	-0.0102647
HSP90AA1	CAPZB	dis_po	0.0215944
LRRC16A	CAPZB	dis_mo	-0.0737198
SAC3D1	CAPZB	dis_mo	-0.0116337
PRKCQ	CARD11	dis_po	0.0581295
UBE2N	CARD11	dis_mo	-0.101593
PACSIN1	CARS	dis_po	0.00476844
PPM1G	CARS	dis_mo	-0.00560766
THUMPD3	CARS	dis_mo	-0.0337962
TMEM1	CARS	dis_mo	-0.0135718
TTC1	CARS	dis_mo	-0.0504054
WARS	CARS	dis_po	0.0594277
AFP	CASP3	dis_mo	-0.00755807
APP	CASP3	dis_po	0.00412703
ARHGDIB	CASP3	dis_mo	-0.00849717
BCL2L1	CASP3	dis_po	0.00287788
BRCA1	CASP3	dis_po	0.0055014
CASP6	CASP3	dis_mo	-0.00338567
CD247	CASP3	dis_po	0.0407806
CD44	CASP3	dis_mo	-0.000440614
GDI1	CASP3	dis_po	0.00920241
HEY2	CASP3	dis_mo	-0.134409
MAG	CASP3	dis_po	0.00128683
MAPK8IP3	CASP3	dis_po	0.0415984
MAPT	CASP3	dis_po	0.00482652
NOTCH4	CASP3	dis_mo	-0.0333516
PRKCQ	CASP3	dis_mo	-0.0136788
PSME3	CASP3	dis_mo	-0.0111186
PTPRF	CASP3	dis_mo	-0.0262028
TEK	CASP3	dis_mo	-0.000625956
CASP3	CASP6	dis_mo	-0.00338567
CDC25A	CASP6	dis_mo	-0.076439
MAPT	CASP6	dis_mo	-0.0171494
RRAS	CASP6	dis_mo	-0.0032135
BAX	CASP9	dis_po	0.0266582
BCL2L1	CASP9	dis_po	0.00254249
DAPK1	CASP9	dis_po	0.011578
DUSP16	CASP9	dis_mo	-0.0200854
ILK	CASP9	dis_po	0.0480094
LYN	CASP9	dis_mo	-0.00606585
EDNRB	CAV1	dis_po	0.000369859
GLIPR2	CAV1	dis_mo	-0.109187
HSP90AA1	CAV1	dis_mo	-0.00321124
ITPR3	CAV1	dis_po	0.0435647
KCNA5	CAV1	dis_po	0.0658067
PRKCDBP	CAV1	dis_mo	-0.120312
RHOC	CAV1	dis_po	0.0239983
RRBP1	CAV1	dis_po	0.401979
SCARB2	CAV1	dis_po	0.0639748
STRN	CAV1	dis_po	0.040247
CSNK2A1	CAV2	dis_po	0.0505343
CEBPZ	CBFB	dis_mo	-0.0147435
CHGB	CBFB	dis_mo	-0.0253624
JUN	CBFB	dis_mo	-0.175001
SPARCL1	CBFB	dis_po	0.0674407
SYT1	CBFB	dis_po	0.1829
EGFR	CBR1	dis_po	0.0204164
NRBF2	CBR1	dis_po	0.020966
PIK3C2A	CBR1	dis_po	0.0903502
EIF4E	CBS	dis_po	0.00517951
EIF5A	CBS	dis_mo	-0.00648959
LONP1	CBS	dis_po	0.0757711
OAT	CBS	dis_mo	-0.00369045
PARP6	CBS	dis_po	0.066793
PPAT	CBS	dis_mo	-0.0229491
PSMA5	CBS	dis_mo	-0.00210248
PSMD4	CBS	dis_mo	-0.000155286
TARS	CBS	dis_mo	-0.00364463
CSNK2A1	CBX2	dis_po	0.085533
PARP1	CBX2	dis_po	0.00996577
PARP12	CBX2	dis_po	0.191082
PCGF2	CBX2	dis_po	0.244344
PHC2	CBX2	dis_mo	-0.794088
PSME3	CBX2	dis_mo	-0.161421
ADSS	CBX3	dis_mo	-0.00373846
AURKB	CBX3	dis_mo	-0.000309878
DDX46	CBX3	dis_mo	-0.00136332
XRCC6	CBX3	dis_mo	-0.00419644
ATG3	CCBL2	dis_mo	-0.0324193
ATG4C	CCBL2	dis_mo	-0.0865267
GABARAPL2	CCBL2	dis_po	0.0878209
MAP1LC3A	CCBL2	dis_po	0.0139621
PIK3C2A	CCBL2	dis_mo	-0.00560994
CDA	CCDC130	dis_po	0.228792
EEF1A1	CCDC130	dis_po	0.0560926
ZBTB16	CCDC130	dis_mo	-0.00888387
IKBKE	CCDC58	dis_mo	-0.03151
ILK	CCDC59	dis_po	0.0405582
MAGED1	CCDC59	dis_mo	-0.0273756
NKX2-1	CCDC59	dis_mo	-0.205672
CD2AP	CCDC6	dis_po	0.0407134
CSNK2A1	CCDC6	dis_po	0.0999595
YWHAB	CCDC6	dis_mo	-0.136326
APEX2	CCDC85B	dis_po	0.0057461
APIP	CCDC85B	dis_po	1.22578
C7orf50	CCDC85B	dis_mo	-0.00955654
FAM164C	CCDC85B	dis_mo	-0.0797768
FASTKD5	CCDC85B	dis_mo	-0.188388
HNRNPC	CCDC85B	dis_mo	-0.014207
LMO3	CCDC85B	dis_po	0.00955318
MBIP	CCDC85B	dis_mo	-0.120951
MCM10	CCDC85B	dis_po	0.0200188
MCRS1	CCDC85B	dis_mo	-0.0368822
MOAP1	CCDC85B	dis_mo	-0.186668
MX1	CCDC85B	dis_po	0.0588564
PSMA1	CCDC85B	dis_po	0.00936173
SCNM1	CCDC85B	dis_po	0.0235008
TSPYL4	CCDC85B	dis_po	0.12036
TTC14	CCDC85B	dis_mo	-0.169495
TYMS	CCDC85B	dis_po	0.00619759
ZFP36	CCDC85B	dis_po	0.00234413
DLEU1	CCDC90B	dis_mo	-0.0236818
EIF2S2	CCDC90B	dis_po	0.00582145
ITSN1	CCDC99	dis_po	0.0279167
ADORA2B	CCL2	dis_po	0.0571586
CD44	CCL2	dis_po	0.00526843
CXCL5	CCL2	dis_po	0.013928
F2R	CCL2	dis_po	0.0201711
ITGAV	CCL2	dis_mo	-0.0414529
PCNA	CCL2	dis_mo	-0.000954943
SERPINE1	CCL2	dis_po	0.0187428
CXCR4	CCL26	dis_po	0.113789
F2R	CCL26	dis_mo	-0.0462226
CDC20	CCNA2	dis_mo	-0.0152409
CDC25C	CCNA2	dis_mo	-0.0132419
CKS1B	CCNA2	dis_po	0.00203912
ITGB3BP	CCNA2	dis_po	0.00584831
PSMD4	CCNA2	dis_mo	-0.0195474
SKP1	CCNA2	dis_po	0.0140563
BUB1B	CCNB1	dis_mo	-0.000331381
BUB3	CCNB1	dis_po	0.00189438
CDC16	CCNB1	dis_po	0.0194972
CDC25B	CCNB1	dis_mo	-0.0156735
CENPM	CCNB1	dis_mo	-0.0141395
FBXO5	CCNB1	dis_mo	-0.00190917
FOXM1	CCNB1	dis_po	0.0126198
KIAA0101	CCNB1	dis_mo	-0.016638
LCK	CCNB1	dis_mo	-0.0109733
MAP4	CCNB1	dis_mo	-0.0119054
MASTL	CCNB1	dis_po	0.00760535
MSI2	CCNB1	dis_mo	-0.110437
NUP205	CCNB1	dis_po	0.00538317
NUP37	CCNB1	dis_mo	-0.00191948
NUP62	CCNB1	dis_mo	-0.0140608
POLA1	CCNB1	dis_mo	-0.000644751
PSMD4	CCNB1	dis_po	0.00195213
PTCH1	CCNB1	dis_mo	-0.0737754
RBPJ	CCNB1	dis_mo	-0.0224992
RCC2	CCNB1	dis_mo	-0.0273198
USO1	CCNB1	dis_mo	-0.0108352
ZWILCH	CCNB1	dis_po	0.0263229
CDC2L6	CCNC	dis_po	0.0506873
HSPA8	CCNC	dis_po	0.00741729
MED14	CCNC	dis_po	0.02787
OAT	CCNC	dis_mo	-0.00612797
PSMA4	CCNC	dis_mo	-0.00953822
CDKN1A	CCND2	dis_mo	-0.151496
FOXM1	CCND2	dis_mo	-0.042159
LCK	CCND2	dis_po	0.035843
PCGF2	CCND2	dis_po	0.0108441
CKS1B	CCNE1	dis_po	0.00744864
H1F0	CCNE1	dis_mo	-0.0124825
HERC5	CCNE1	dis_mo	-0.0111758
MYBL2	CCNE1	dis_mo	-0.00129272
SMARCA2	CCNE1	dis_mo	-0.00237847
SMARCD3	CCNE1	dis_mo	-0.0619407
UBTF	CCNE1	dis_po	0.00203377
PPP2CA	CCNG2	dis_mo	-0.0263796
ELAVL1	CCNY	dis_mo	-0.0457424
EIF2C3	CCT3	dis_po	0.0156935
ERRFI1	CCT3	dis_mo	-0.0654367
HSP90AA1	CCT3	dis_po	0.00499011
ILK	CCT3	dis_po	0.00191773
KIAA0368	CCT3	dis_po	0.00142303
MAPK13	CCT3	dis_po	0.00329893
MIPEP	CCT3	dis_po	0.0311748
PIF1	CCT3	dis_po	0.018864
PMM2	CCT3	dis_po	0.00909517
PPP2R2B	CCT3	dis_mo	-0.000318906
PPP4C	CCT3	dis_po	0.0102834
PSMA3	CCT3	dis_mo	-0.00463456
PSMB3	CCT3	dis_po	0.00210464
RPS7	CCT3	dis_po	0.00308173
TCEA1	CCT3	dis_mo	-0.00301895
TRIM28	CCT3	dis_mo	-0.000158603
TUBB2A	CCT3	dis_mo	-0.0148374
ACTB	CCT6A	dis_mo	-0.0202814
AHSA1	CCT6A	dis_po	0.0183767
CCT7	CCT6A	dis_mo	-0.00403114
GFPT2	CCT6A	dis_mo	-0.00695623
GSTP1	CCT6A	dis_po	0.00552052
LYN	CCT6A	dis_po	0.00281657
PIK3C2A	CCT6A	dis_po	0.000453609
PMM2	CCT6A	dis_po	0.00161388
PPP4C	CCT6A	dis_mo	-0.00767288
PRKDC	CCT6A	dis_po	0.00610805
PWP1	CCT6A	dis_po	0.000991208
TMEM165	CCT6A	dis_mo	-0.0902971
TOMM70A	CCT6A	dis_po	0.00774177
PPP4C	CCT6P1	dis_mo	-0.162119
CCT6A	CCT7	dis_mo	-0.00403114
GCNT1	CCT7	dis_mo	-0.0900867
HDAC6	CCT7	dis_po	0.0140572
MVD	CCT7	dis_po	0.00463736
STRN	CCT7	dis_po	0.00377838
TRIM28	CCT7	dis_mo	-0.00213349
TUBB2B	CCT7	dis_po	0.013389
TUBB3	CCT7	dis_mo	-0.00479987
YWHAB	CCT7	dis_po	0.00167857
ARPC2	CCT8	dis_mo	-0.00626886
ATG3	CCT8	dis_mo	-0.00792503
ATG4C	CCT8	dis_mo	-0.00457858
DHX15	CCT8	dis_mo	-0.000610988
GSN	CCT8	dis_po	0.0328945
MTRF1L	CCT8	dis_po	0.109632
NME1	CCT8	dis_po	0.0187873
PSMC5	CCT8	dis_mo	-0.0089608
SMC6	CCT8	dis_po	0.0207254
STRN	CCT8	dis_mo	-0.0127779
TUBA4A	CCT8	dis_mo	-0.00382392
VCAM1	CCT8	dis_po	0.00362414
CASP3	CD247	dis_po	0.0407806
TFRC	CD247	dis_mo	-0.0411362
ACTC1	CD2AP	dis_po	0.00110077
BRCC3	CD2AP	dis_mo	-0.12777
CCDC6	CD2AP	dis_po	0.0407134
CSNK2A1	CD2AP	dis_mo	-0.00308062
CTTN	CD2AP	dis_po	0.00556163
JAK1	CD2AP	dis_po	0.00872427
KIT	CD2AP	dis_mo	-0.00280711
NRAS	CD2AP	dis_po	0.00340744
SGK	CD2AP	dis_po	0.000263647
UFD1L	CD2AP	dis_po	0.10467
CD9	CD36	dis_mo	-0.0341663
COL1A1	CD36	dis_mo	-0.017701
FYN	CD36	dis_mo	-0.0208065
LDLR	CD36	dis_po	0.044628
SYK	CD36	dis_mo	-0.00262005
CASP3	CD44	dis_mo	-0.000440614
CCL2	CD44	dis_po	0.00526843
COL1A1	CD44	dis_po	0.00810552
EGFR	CD44	dis_po	0.00144939
HMMR	CD44	dis_mo	-0.0410855
IGFBP3	CD44	dis_mo	-0.0152738
ITGB1	CD44	dis_po	0.012728
SLC3A2	CD44	dis_po	0.0367874
SMAD3	CD44	dis_po	0.00265986
TGFBR2	CD44	dis_mo	-0.0140394
VCAN	CD44	dis_mo	-0.00164182
ITGAV	CD47	dis_po	0.0082738
JAK1	CD47	dis_po	0.0418616
AP2M1	CD74	dis_po	0.0056007
AP2S1	CD74	dis_po	0.00839225
APP	CD74	dis_po	0.0863081
CXCR4	CD74	dis_mo	-0.034016
PDGFRB	CD79B	dis_po	0.0407324
SH3KBP1	CD79B	dis_po	0.129991
STAT1	CD79B	dis_mo	-0.0373951
PPFIA1	CD83	dis_mo	-0.13578
ATP6V1A	CD9	dis_po	0.0466492
CD36	CD9	dis_mo	-0.0341663
CLN8	CD9	dis_mo	-0.0629951
ITGA6	CD9	dis_po	0.0443625
LGALS3BP	CD9	dis_po	0.0497836
MME	CD9	dis_po	0.0361495
SLC3A2	CD9	dis_po	0.0535
CCDC130	CDA	dis_po	0.228792
NUDT5	CDA	dis_mo	-0.614512
ATP6V0D1	CDC123	dis_po	0.0253776
CAMK1D	CDC123	dis_mo	-0.460267
EEF1A1	CDC123	dis_po	0.699681
EIF5	CDC123	dis_po	0.211459
AFG3L2	CDC16	dis_po	0.040765
AURKA	CDC16	dis_po	0.00620513
AURKB	CDC16	dis_po	0.00641129
BOP1	CDC16	dis_po	0.00264619
BUB3	CDC16	dis_mo	-0.00375846
C11orf51	CDC16	dis_mo	-0.091308
CCNB1	CDC16	dis_po	0.0194972
CDH1	CDC16	dis_mo	-0.002576
GNL3	CDC16	dis_po	0.0108817
NIP7	CDC16	dis_mo	-0.00652979
PSMC2	CDC16	dis_mo	-0.0144133
PTTG1	CDC16	dis_mo	-0.01514
SKIL	CDC16	dis_po	0.0197187
UBE2C	CDC16	dis_mo	-0.00352128
ANAPC11	CDC20	dis_mo	-0.00232914
BTRC	CDC20	dis_mo	-0.0036687
CCNA2	CDC20	dis_mo	-0.0152409
CDC26	CDC20	dis_mo	-0.00378562
CDT1	CDC20	dis_po	0.0142475
CENPH	CDC20	dis_po	0.0153394
CENPK	CDC20	dis_mo	-0.0118146
CENPM	CDC20	dis_po	0.00186473
ESPL1	CDC20	dis_mo	-0.00687137
HDAC6	CDC20	dis_mo	-0.00109467
MAD2L1	CDC20	dis_po	0.0124559
MAD2L1BP	CDC20	dis_po	0.0284615
NUP107	CDC20	dis_mo	-0.00700534
NUP37	CDC20	dis_mo	-0.00798928
SOSTDC1	CDC20	dis_po	0.148399
TOP2A	CDC20	dis_mo	-0.00353376
ZWILCH	CDC20	dis_mo	-0.0156827
BMP7	CDC25A	dis_po	0.0106301
CASP6	CDC25A	dis_mo	-0.076439
DNAJC7	CDC25A	dis_po	0.0172389
EIF2S2	CDC25A	dis_mo	-0.0053928
ESPL1	CDC25A	dis_mo	-0.00694419
HCLS1	CDC25A	dis_po	0.00312526
MCM6	CDC25A	dis_po	0.00880845
TPD52L1	CDC25A	dis_mo	-0.070188
TRIB3	CDC25A	dis_mo	-0.0212233
ZFP36	CDC25A	dis_po	0.00776339
CCNB1	CDC25B	dis_mo	-0.0156735
CSNK2A1	CDC25B	dis_mo	-0.022864
DOCK2	CDC25B	dis_po	0.036836
YWHAB	CDC25B	dis_po	0.00396224
YWHAH	CDC25B	dis_mo	-0.0701775
ANAPC11	CDC25C	dis_po	0.01232
BRCA1	CDC25C	dis_mo	-0.0207107
CCNA2	CDC25C	dis_mo	-0.0132419
CDS1	CDC25C	dis_mo	-0.107787
LCK	CDC25C	dis_mo	-0.0188142
SALL1	CDC25C	dis_po	0.0309087
ANAPC1	CDC26	dis_mo	-0.00698504
AURKB	CDC26	dis_po	0.0150155
CDC20	CDC26	dis_mo	-0.00378562
PTTG1	CDC26	dis_po	0.00610767
CCNC	CDC2L6	dis_po	0.0506873
SIRT1	CDC42BPA	dis_po	0.0991886
RHOQ	CDC42EP4	dis_po	0.0472387
CDKN1A	CDC45L	dis_po	0.0249894
MCM2	CDC45L	dis_po	0.0479742
APP	CDCA3	dis_po	0.0752031
BCL11A	CDCA3	dis_mo	-0.0279177
CTDSP1	CDCA3	dis_mo	-0.0365299
SEPHS1	CDCA4	dis_mo	-0.0520463
APITD1	CDCA5	dis_po	0.00374572
BUB1	CDCA5	dis_mo	-0.00743564
CENPA	CDCA5	dis_po	0.00765107
ITGB3BP	CDCA5	dis_mo	-0.00147534
LARP1	CDCA5	dis_mo	-0.0233772
MAD2L1	CDCA5	dis_po	0.0190271
ZWILCH	CDCA5	dis_po	0.008386
ZWINT	CDCA5	dis_po	0.0321582
APP	CDCA7	dis_mo	-0.136939
ELAVL1	CDCA7L	dis_mo	-0.0247824
HDAC6	CDCA7L	dis_po	0.0332491
AURKB	CDCA8	dis_mo	-0.0102944
BUB1B	CDCA8	dis_mo	-0.00542244
ESPL1	CDCA8	dis_po	0.00181863
MAPKAPK5	CDCA8	dis_po	0.00146945
NEK3	CDCA8	dis_po	0.0209833
ANK2	CDH1	dis_po	0.000737177
ARPC2	CDH1	dis_po	0.00711831
CDC16	CDH1	dis_mo	-0.002576
MMP9	CDH1	dis_po	0.0134391
NKD2	CDH1	dis_po	0.0136057
PLEKHA7	CDH1	dis_mo	-0.0251485
TK1	CDH1	dis_po	0.0134549
TNS3	CDH1	dis_mo	-0.0142883
TRIM33	CDH1	dis_po	0.00602885
USP9X	CDH1	dis_mo	-0.0150144
ARMCX2	CDH2	dis_mo	-0.0460571
CTNND2	CDH2	dis_mo	-0.0290688
EGFR	CDH2	dis_po	0.000308162
FGFR4	CDH2	dis_mo	-0.00363858
GNA12	CDH2	dis_mo	-0.167421
MRPL23	CDH2	dis_po	0.0223094
SARS2	CDH2	dis_po	0.0587481
TPM4	CDH2	dis_mo	-0.0259063
YWHAB	CDH2	dis_po	0.106017
POLA1	CDK2AP1	dis_po	0.0259634
APP	CDK5R1	dis_po	0.177521
CDK5RAP3	CDK5R1	dis_po	0.140387
DPYSL3	CDK5R1	dis_mo	-0.0615451
EFEMP2	CDK5R1	dis_mo	-2.18537
FYN	CDK5R1	dis_mo	-0.395275
HSP90AA1	CDK5R1	dis_mo	-0.0764703
NRP1	CDK5R1	dis_mo	-0.0226245
PAK1	CDK5R1	dis_po	0.354288
PLXNA3	CDK5R1	dis_po	0.0858457
CDK5R1	CDK5RAP3	dis_po	0.140387
HSPA4	CDK5RAP3	dis_mo	-0.32219
HSPA8	CDK5RAP3	dis_po	0.0550226
MDM2	CDK5RAP3	dis_po	0.171054
ATP2B4	CDK7	dis_po	0.00125678
BRCA1	CDK7	dis_mo	-0.0245044
ERCC1	CDK7	dis_po	0.0661889
GTF2E1	CDK7	dis_po	0.0150525
LASP1	CDK7	dis_po	0.0201744
MCM7	CDK7	dis_po	0.00481182
NCBP2	CDK7	dis_mo	-4.92417e-05
NEK6	CDK7	dis_mo	-0.00463246
POLR2F	CDK7	dis_po	0.00030736
PSMA5	CDK7	dis_mo	-0.01007
TAF4B	CDK7	dis_po	0.172926
TCEA1	CDK7	dis_po	0.000739205
CCND2	CDKN1A	dis_mo	-0.151496
CDC45L	CDKN1A	dis_po	0.0249894
CENPB	CDKN1A	dis_po	0.0187722
GMNN	CDKN1A	dis_po	0.00822485
GNG3	CDKN1A	dis_mo	-0.398862
HERC5	CDKN1A	dis_mo	-0.00147409
IKBKG	CDKN1A	dis_po	0.00065577
ITGB1BP3	CDKN1A	dis_mo	-0.0585944
MCM6	CDKN1A	dis_po	0.00303809
NKD2	CDKN1A	dis_po	0.0168552
RNF114	CDKN1A	dis_po	0.0260032
SET	CDKN1A	dis_mo	-0.00833216
SKP1	CDKN1A	dis_po	0.00280701
SP110	CDKN1A	dis_po	0.0110876
TLE1	CDKN1A	dis_po	0.0106584
MCM7	CDKN1C	dis_po	0.0165575
MYBL2	CDKN1C	dis_mo	-0.0806894
APP	CDKN2D	dis_mo	-0.0891498
BRCA1	CDKN2D	dis_mo	-0.0268028
DPY30	CDKN2D	dis_mo	-0.0422597
EIF5	CDKN2D	dis_mo	-0.0180254
SH3KBP1	CDKN2D	dis_po	0.327555
BRCA1	CDS1	dis_po	0.0679953
CDC25C	CDS1	dis_mo	-0.107787
DHDDS	CDS1	dis_po	0.0666246
PRELID1	CDS1	dis_po	0.0765454
RNASEH2A	CDS1	dis_mo	-0.0401248
CDC20	CDT1	dis_po	0.0142475
MAPK1	CDT1	dis_mo	-0.0305818
EHMT2	CDYL	dis_mo	-0.0167276
MYC	CDYL	dis_po	0.0952014
NUP107	CDYL	dis_mo	-0.0117866
SETDB1	CDYL	dis_mo	-0.0452293
EGFR	CEACAM1	dis_po	0.0060254
ERBB3	CEACAM1	dis_po	0.0120191
SHC1	CEACAM1	dis_mo	-0.023487
ATF5	CEBPD	dis_mo	-0.0882316
FANCD2	CEBPD	dis_po	0.120344
HDAC3	CEBPD	dis_po	0.0114671
IPO4	CEBPD	dis_mo	-0.080112
SMAD3	CEBPD	dis_po	0.117298
BOP1	CEBPZ	dis_po	0.000125665
CBFB	CEBPZ	dis_mo	-0.0147435
DDX27	CEBPZ	dis_po	0.000783396
MYC	CEBPZ	dis_mo	-0.0178478
RPS7	CEBPZ	dis_po	0.00314949
PSMA4	CECR5	dis_mo	-0.0994498
ERBB2	CEL	dis_po	0.0141776
ARMCX2	CELSR2	dis_po	0.0727894
CTNND2	CELSR2	dis_mo	-0.0714144
GARS	CELSR2	dis_mo	-0.00960123
KIFAP3	CELSR2	dis_mo	-0.0104749
NRXN2	CELSR2	dis_po	0.018106
PHF10	CELSR2	dis_mo	-0.0772698
CDCA5	CENPA	dis_po	0.00765107
CENPB	CENPA	dis_po	0.024328
CENPM	CENPA	dis_po	0.00597078
ERCC6L	CENPA	dis_mo	-0.0433329
ESPL1	CENPA	dis_po	0.000846485
FYN	CENPA	dis_mo	-0.00590714
HJURP	CENPA	dis_po	0.0948355
KIF11	CENPA	dis_po	0.0574379
MAD2L1	CENPA	dis_mo	-0.000764099
MYBL2	CENPA	dis_mo	-0.00265259
NUP85	CENPA	dis_mo	-0.003919
PHF10	CENPA	dis_po	0.200539
TUBB	CENPA	dis_po	0.00428624
APP	CENPB	dis_po	0.00631091
CDKN1A	CENPB	dis_po	0.0187722
CENPA	CENPB	dis_po	0.024328
ETS1	CENPB	dis_mo	-0.0057215
PARP1	CENPB	dis_po	0.138068
BUB1	CENPH	dis_mo	-0.0272311
CDC20	CENPH	dis_po	0.0153394
CENPN	CENPH	dis_po	0.00351785
ESPL1	CENPH	dis_mo	-0.00106876
ITGB3BP	CENPH	dis_po	0.00281801
SGOL1	CENPH	dis_mo	-0.018053
TRIM36	CENPH	dis_po	0.0834945
BIRC5	CENPK	dis_po	0.00154721
CDC20	CENPK	dis_mo	-0.0118146
HJURP	CENPK	dis_po	0.0198708
NUP107	CENPK	dis_po	0.00718601
NUP37	CENPK	dis_mo	-0.00745476
SGOL1	CENPK	dis_mo	-0.00590106
ZWINT	CENPK	dis_mo	-0.0215263
CCNB1	CENPM	dis_mo	-0.0141395
CDC20	CENPM	dis_po	0.00186473
CENPA	CENPM	dis_po	0.00597078
DSN1	CENPM	dis_po	0.000194517
ERCC6L	CENPM	dis_po	0.00244823
RANGAP1	CENPM	dis_mo	-0.00525385
ZWILCH	CENPM	dis_po	0.0110604
BIRC5	CENPN	dis_po	0.00239352
CENPH	CENPN	dis_po	0.00351785
HJURP	CENPN	dis_po	0.013316
SEH1L	CENPN	dis_mo	-0.0024728
ZWINT	CENPN	dis_mo	-0.0135959
FRS3	CENTA1	dis_mo	-0.0170828
GNA12	CENTA1	dis_po	0.00215869
TEAD4	CEP55	dis_mo	-0.0180473
TUBG1	CEP55	dis_mo	-0.0385932
VPS37D	CEP55	dis_mo	-0.00435212
NODAL	CER1	dis_mo	-0.0790937
SIRT1	CGN	dis_mo	-0.0136267
TJP2	CGN	dis_po	0.147769
YWHAB	CGN	dis_po	0.00942542
YWHAH	CGN	dis_mo	-0.0639872
APEX2	CHAF1A	dis_mo	-0.0190934
MSH6	CHAF1A	dis_mo	-0.0117417
PCNA	CHAF1A	dis_po	0.000244327
TRIM28	CHAF1A	dis_po	0.00507928
WRN	CHAF1A	dis_po	0.0245895
XRCC6	CHAF1A	dis_po	0.04334
ASF1A	CHAF1B	dis_po	0.0197972
BRMS1	CHAF1B	dis_mo	-0.000169515
MCM3	CHAF1B	dis_po	0.0602668
RGS7	CHAF1B	dis_mo	-0.207582
SETDB1	CHAF1B	dis_mo	-0.14256
SNRPD1	CHAF1B	dis_mo	-0.00988013
AKT1	CHEK1	dis_mo	-8.8372e-05
CSNK2A1	CHEK1	dis_mo	-0.000634877
DTL	CHEK1	dis_mo	-0.0293004
LSM1	CHEK1	dis_po	0.00172017
SQSTM1	CHEK1	dis_mo	-0.0135432
ASF1B	CHEK2	dis_mo	-0.0112964
BRCA1	CHEK2	dis_mo	-0.00106292
GINS2	CHEK2	dis_mo	-0.0248228
H1F0	CHEK2	dis_mo	-0.0817548
HIST3H2A	CHEK2	dis_mo	-0.0103729
KDR	CHEK2	dis_po	0.0251196
MCM3	CHEK2	dis_mo	-0.00797648
PPP2R2B	CHEK2	dis_mo	-0.00410883
RECQL	CHEK2	dis_po	0.125699
SIRT5	CHEK2	dis_mo	-0.00222475
CBFB	CHGB	dis_mo	-0.0253624
MOGS	CHGB	dis_po	0.0262803
OGG1	CHGB	dis_po	0.0907258
TK1	CHGB	dis_mo	-0.0716173
TUBB2A	CHGB	dis_po	0.00389132
TWF2	CHGB	dis_mo	-0.101939
HSPA5	CHIC2	dis_po	0.0141506
AHNAK	CHN2	dis_po	0.0204271
ATP5A1	CHN2	dis_po	0.00346124
DEK	CHN2	dis_po	0.0229031
E2F7	CHN2	dis_po	0.0700802
EIF5A	CHN2	dis_mo	-0.0268698
EPHA4	CHN2	dis_mo	-0.000949722
EWSR1	CHN2	dis_mo	-0.00231872
LIMS1	CHN2	dis_mo	-0.00540856
NEK6	CHN2	dis_mo	-0.0182046
PARD6A	CHN2	dis_po	0.00949309
RACGAP1	CHN2	dis_po	0.00830926
RAN	CHN2	dis_po	0.00614881
SUPT16H	CHN2	dis_po	0.00245476
TGFBR2	CHN2	dis_po	0.00235414
TYRO3	CHN2	dis_mo	-0.00504552
XRCC6	CHN2	dis_mo	-0.00506971
BGN	CHPF	dis_mo	-0.0429758
BTRC	CHPF	dis_po	0.515767
VCAN	CHPF	dis_po	1.36847
BGN	CHST13	dis_po	0.0318911
BGN	CHST3	dis_po	0.0815846
VCAN	CHSY1	dis_po	0.049814
AURKB	CIB1	dis_mo	-0.00849912
FEZ1	CIB1	dis_mo	-0.0177407
PRKDC	CIB1	dis_po	0.00728228
SYK	CIB1	dis_mo	-0.0108701
DHX37	CIRH1A	dis_mo	-0.00562329
DIAPH1	CIRH1A	dis_mo	-0.0232783
DKC1	CIRH1A	dis_po	0.00111587
MVD	CIRH1A	dis_po	0.00244786
PSMA4	CIRH1A	dis_po	0.00240401
UTP11L	CIRH1A	dis_mo	-0.137587
UTP18	CIRH1A	dis_po	0.0124124
ELAVL1	CITED2	dis_mo	-0.0839312
LHX2	CITED2	dis_mo	-0.256983
ATG4C	CKB	dis_mo	-0.0081114
EEF2K	CKB	dis_po	0.00787298
HSP90AA1	CKB	dis_mo	-0.00292795
MAP1LC3A	CKB	dis_mo	-0.00744121
MAP3K7IP1	CKB	dis_po	0.0599502
MAPK13	CKB	dis_po	0.00632654
ACAT1	CKS1B	dis_po	0.00713843
ANAPC11	CKS1B	dis_po	0.00470969
BMP7	CKS1B	dis_mo	-0.0681438
CCNA2	CKS1B	dis_po	0.00203912
CCNE1	CKS1B	dis_po	0.00744864
ESPL1	CKS1B	dis_mo	-0.00210881
HSP90AA1	CKS1B	dis_po	0.00426701
KIAA0368	CKS1B	dis_po	0.000587921
ORC1L	CKS1B	dis_po	0.021471
PSMC2	CKS1B	dis_po	0.00177873
CLDN3	CLDN1	dis_po	0.0883978
MPDZ	CLDN1	dis_po	0.0285845
TJP2	CLDN1	dis_mo	-0.0921068
APP	CLDN3	dis_po	0.455319
CLDN1	CLDN3	dis_po	0.0883978
CLDN5	CLDN3	dis_mo	-0.358555
TJP2	CLDN3	dis_po	0.353694
CLDN3	CLDN5	dis_mo	-0.358555
MPDZ	CLDN5	dis_mo	-0.0259865
KITLG	CLEC11A	dis_po	0.0233792
BNIP3L	CLN8	dis_po	0.0114986
CD9	CLN8	dis_mo	-0.0629951
GPM6B	CLN8	dis_mo	-0.0225558
TMEM147	CLN8	dis_mo	-0.146671
ELAVL1	CMPK1	dis_po	0.0172546
MRPL3	CMPK1	dis_mo	-0.0127697
RPL8	CMPK1	dis_mo	-0.0914062
MEST	CMTM3	dis_po	0.0548085
SPP1	CMTM3	dis_po	0.0217892
ARFGEF1	CNDP2	dis_po	0.0108438
GLA	CNDP2	dis_po	0.00337519
LDHA	CNDP2	dis_mo	-0.0227833
MVD	CNDP2	dis_po	0.00135622
NANS	CNDP2	dis_mo	-0.328335
OAT	CNDP2	dis_mo	-0.0057026
PABPN1	CNDP2	dis_mo	-0.00990058
SEH1L	CNDP2	dis_po	0.00174784
SYVN1	CNDP2	dis_mo	-0.00470723
ACTG2	CNN1	dis_po	0.0172265
HCLS1	CNN1	dis_po	0.0102355
MAPK1	CNN1	dis_po	0.0156406
PDGFRB	CNN1	dis_po	0.0224086
TNNC1	CNN1	dis_po	0.0251105
TPM1	CNN1	dis_po	0.0305014
APP	COASY	dis_mo	-0.269486
EDC4	COASY	dis_mo	-0.0296699
SIRT1	COASY	dis_mo	-0.0296837
CTNND2	COBL	dis_mo	-0.0889779
PACSIN1	COBL	dis_po	0.0202273
RGS4	COBL	dis_po	0.0158316
COL1A1	COCH	dis_po	0.0883902
CRTAP	COL11A1	dis_mo	-0.032202
CRTAP	COL13A1	dis_po	0.035726
CTSK	COL18A1	dis_po	0.122684
ITGA3	COL18A1	dis_po	0.128082
ITGAV	COL18A1	dis_po	0.167025
ITGB5	COL18A1	dis_po	0.027237
KDR	COL18A1	dis_mo	-0.388465
LAMA1	COL18A1	dis_po	0.0848513
MMP9	COL18A1	dis_po	0.00125321
MSN	COL18A1	dis_po	0.244267
ACHE	COL1A1	dis_mo	-0.163902
BGN	COL1A1	dis_po	0.0279906
C1S	COL1A1	dis_mo	-0.507
CD36	COL1A1	dis_mo	-0.017701
CD44	COL1A1	dis_po	0.00810552
COCH	COL1A1	dis_po	0.0883902
EFEMP1	COL1A1	dis_mo	-0.00259716
IGFBP6	COL1A1	dis_po	0.0783909
MATN2	COL1A1	dis_mo	-0.362644
MPZL1	COL1A1	dis_po	0.0823147
SERPINE1	COL1A1	dis_mo	-0.00361878
STC2	COL1A1	dis_po	0.00511013
TNFAIP6	COL1A1	dis_po	0.0442727
VWF	COL1A1	dis_po	0.0432859
COL6A1	COL2A1	dis_mo	-0.0364405
[truncated: 38,570 more rows]
