# Supplementary material for: Dynamic Network-Based Relevance Score Reveals Essential Proteins and Functional Modules in Directed Differentiation
Source: Stem Cells Int. 2015 Apr 21;2015:792843. doi: 10.1155/2015/792843 (PMC4419265; doi:10.1155/2015/792843)
Supplement: Supplementary file 1 — The supplementary materials contain the whole interaction difference networks from LSB stage to LSB/S/F8 stage and from LSB/S/F8 stage to LSB/S/F8/CHIR stage (docx file) and the tables used in Cytoscape to visualize the interaction difference networks (xlsx files). [file 792843.f1.zip › New folder/difference_LSBF8CHIR-LSBF8_node_cytoscape.xlsx]

## Sheet: 工作表2 _function
ID	status	Angiogenesis	Cytoskeletal regulation by Rho GTPase	EGF receptor signaling pathway	FGF signaling pathway	Gonadotropin releasing hormone receptor pathway	Huntington disease	Integrin signalling pathway	Parkinson disease	PDGF signaling pathway	Ras Pathway	TGF-beta signaling pathway	VEGF signaling pathway	function	shh	wnt
AARSD1	dis_node													0
ABAT	dis_node													0
ABCC8	dis_node													0
ACBD6	dis_node													0
ACIN1	dis_node													0
ADD3	dis_node													0
ADM2	dis_node													0
ADSS	dis_node													0		1
AHI1	dis_node													0
AHNAK	dis_node													0
AIF1L	dis_node													0
ALDH1A3	dis_node													0
ALLC	dis_node													0
ANAPC11	dis_node													0
ANK2	dis_node													0
ANKRD28	dis_node													0
ANKS1B	dis_node													0
ANO6	dis_node													0
AP3B1	dis_node													0
APH1B	dis_node													0
APOE	dis_node													0
ARFGAP3	dis_node													0
ARFIP1	dis_node						1							1
ARID3B	dis_node													0
ASCL1	dis_node					1								1
ASF1B	dis_node													0
ASPM	dis_node													0
ATP2B4	dis_node													0
ATP5A1	dis_node													0
ATP6V0A1	dis_node													0
ATP6V1A	dis_node													0
BBS2	dis_node													0
BBS4	dis_node													0
BCAT1	dis_node													0
BCL2	dis_node													0
BCL2L12	dis_node													0
BDH1	dis_node													0
BGN	dis_node													0
BIN1	dis_node													0
BLM	dis_node													0
BMP7	dis_node					1						1		2
BMPR2	dis_node					1						1		2
BPTF	dis_node													0
BRCC3	dis_node													0
BSCL2	dis_node													0
BTRC	dis_node								1					1	1	1
C10orf35	dis_node													0
C14orf147	dis_node													0
C19orf33	dis_node													0
C1GALT1C1	dis_node													0
C1orf135	dis_node													0
C20orf11	dis_node													0
C3orf15	dis_node													0
C3orf64	dis_node													0
C4orf34	dis_node													0
C5orf62	dis_node													0
C7orf36	dis_node													0
C9orf91	dis_node													0
CACNG2	dis_node													0
CADPS2	dis_node													0
CAMK1D	dis_node													0
CAMK2N1	dis_node													0
CAPN12	dis_node						1							1
CAPN5	dis_node						1							1
CAPN6	dis_node						1							1
CBX2	dis_node													0
CCDC130	dis_node													0
CCDC58	dis_node													0
CCDC85B	dis_node													0
CCNY	dis_node													0
CCT6P1	dis_node													0
CCT8	dis_node													0
CD44	dis_node													0
CDC25B	dis_node													0
CDC2L6	dis_node													0
CDC42EP4	dis_node													0
CDCA3	dis_node													0
CDCA8	dis_node													0
CDK5R1	dis_node													0
CDKN1A	dis_node													0
CDKN2D	dis_node													0
CEBPD	dis_node													0
CEL	dis_node													0
CELSR2	dis_node													0		1
CENPB	dis_node													0
CENPH	dis_node													0
CHAF1B	dis_node													0
CHSY1	dis_node													0
CLDN1	dis_node													0
CLDN5	dis_node													0
CMTM3	dis_node													0
COL11A1	dis_node							1						1
COL13A1	dis_node							1						1
COL18A1	dis_node							1						1
COL4A6	dis_node							1						1
COL6A1	dis_node							1						1
COL9A1	dis_node							1						1
COQ10B	dis_node													0
CORO2A	dis_node													0
CORO2B	dis_node													0
CPE	dis_node													0
CPEB4	dis_node													0
CPNE3	dis_node													0
CRTAP	dis_node													0
CTNND2	dis_node													0
CXXC5	dis_node													0
CXorf26	dis_node													0
CYP51A1	dis_node													0
DACH2	dis_node													0
DGKQ	dis_node													0
DHCR24	dis_node													0
DHDDS	dis_node													0
DHRS3	dis_node													0
DHX33	dis_node													0
DIP2B	dis_node													0
DKK3	dis_node													0
DLEU1	dis_node													0
DLX5	dis_node													0
DNAJB9	dis_node													0
DNAL4	dis_node						1							1
DPF1	dis_node													0
DPP6	dis_node													0
DUSP3	dis_node													0
EBP	dis_node													0
EDC4	dis_node													0
EDN3	dis_node													0
EFS	dis_node							1						1
EGFR	dis_node			1		1								2
EGLN3	dis_node													0
EHMT2	dis_node													0
EIF1	dis_node													0
EIF2A	dis_node					1								1
EIF5	dis_node													0
ELAVL1	dis_node													0
ELAVL2	dis_node													0
ELAVL4	dis_node													0
ELF4	dis_node									1				1
ELK4	dis_node									1				1
ELOVL4	dis_node													0
ENC1	dis_node													0
EPHB3	dis_node	1												1
EPHB4	dis_node													0
ERRFI1	dis_node													0
ESPL1	dis_node													0
ETV6	dis_node													0
EVL	dis_node		1											1
EXOSC2	dis_node													0
EXOSC4	dis_node													0
EXOSC8	dis_node													0
F2R	dis_node													0
F3	dis_node	1												1
FABP7	dis_node													0
FAM120B	dis_node													0
FAM129A	dis_node													0
FAM136A	dis_node													0
FAM164C	dis_node													0
FAM169A	dis_node													0
FAM64A	dis_node													0
FASTKD5	dis_node													0
FAT3	dis_node													0		1
FBXL6	dis_node													0
FBXO33	dis_node													0
FBXW2	dis_node													0
FDX1L	dis_node													0
FGD3	dis_node													0
FGF8	dis_node				1									1
FGFR3	dis_node				1									1
FGFRL1	dis_node													0
FHOD3	dis_node													0
FJX1	dis_node													0
FLRT3	dis_node													0
FNBP1	dis_node													0
FOXJ1	dis_node													0
FOXN3	dis_node													0
FREQ	dis_node													0
FRS3	dis_node	1			1									2
FZD8	dis_node	1												1		1
GAA	dis_node													0
GALNT12	dis_node													0
GCNT1	dis_node													0
GDI1	dis_node													0
GDI2	dis_node													0
GGCT	dis_node													0
GINS3	dis_node													0
GJA1	dis_node													0
GLA	dis_node													0
GLTP	dis_node													0
GPC2	dis_node													0
GPM6B	dis_node													0
GRK5	dis_node													0
GRP	dis_node													0
GSTK1	dis_node													0
GTF2F2	dis_node													0
GTF2IRD1	dis_node													0
HCFC1R1	dis_node													0
HDAC6	dis_node													0
HDC	dis_node													0
HERC3	dis_node													0
HES5	dis_node													0
HEY1	dis_node													0
HEY2	dis_node													0
HIST1H2AC	dis_node													0
HIST1H2BD	dis_node													0
HIST1H4C	dis_node													0
HIST2H2AA3	dis_node													0
HIST2H2BE	dis_node													0
HIST3H2A	dis_node													0
HJURP	dis_node													0
HNRNPC	dis_node													0
HNRNPU	dis_node													0
HOMER1	dis_node													0
HOPX	dis_node													0
HPCAL1	dis_node													0
HPS6	dis_node													0
HS6ST2	dis_node													0
HSD11B2	dis_node													0
HSPA12A	dis_node													0
HSPA5	dis_node					1			1					2
HSPA8	dis_node					1			1					2
HTATIP2	dis_node													0
IGDCC3	dis_node													0
IGFBP2	dis_node													0
IKBKG	dis_node													0
IL11RA	dis_node													0
IL17RD	dis_node													0
IMMP2L	dis_node													0
INHBE	dis_node											1		1
IPO4	dis_node													0
ISL1	dis_node					1								1
ISOC2	dis_node													0
ITGB3BP	dis_node													0
ITLN2	dis_node													0
KCNA5	dis_node													0
KCNF1	dis_node													0
KCNG1	dis_node													0
KCNG3	dis_node													0
KCNIP1	dis_node													0
KCNIP4	dis_node													0
KCNK1	dis_node													0
KCNMB1	dis_node													0
KCNS3	dis_node													0
KIAA0101	dis_node													0
KIAA1199	dis_node													0
KIAA1217	dis_node													0
KIAA1737	dis_node													0
KIF21B	dis_node													0
KITLG	dis_node													0
KLHL24	dis_node													0
KLHL7	dis_node													0
LAD1	dis_node													0
LAMB2	dis_node							1						1
LCLAT1	dis_node													0
LDB2	dis_node													0
LDLRAD3	dis_node													0
LEPR	dis_node													0
LHX2	dis_node					1								1
LHX4	dis_node													0
LIMCH1	dis_node													0
LIMS2	dis_node							1						1
LIN7A	dis_node													0
LPAR4	dis_node													0
LRCH2	dis_node													0
LRRC8D	dis_node													0
LSR	dis_node													0
LTBP1	dis_node													0
MAF	dis_node													0
MAGI3	dis_node													0
MAOA	dis_node													0
MAP2K6	dis_node			1		1					1			3
MAP3K7IP1	dis_node													0
MAPRE3	dis_node													0
MAPT	dis_node													0
MBIP	dis_node													0
MEF2D	dis_node													0
METTL14	dis_node													0
MFNG	dis_node													0
MIPEP	dis_node													0
MMP7	dis_node													0		1
MND1	dis_node													0
MNT	dis_node													0
MPDZ	dis_node													0
MPG	dis_node													0
MPV17	dis_node													0
MRAP2	dis_node													0
MRPL18	dis_node													0
MRPL49	dis_node													0
MRPL50	dis_node													0
MRPS15	dis_node													0
MRPS16	dis_node													0
MSI2	dis_node													0
MSLN	dis_node													0
MTMR12	dis_node													0
MXD1	dis_node													0
MXRA7	dis_node													0
NADK	dis_node													0
NADSYN1	dis_node													0
NCAM1	dis_node													0
NCAPG	dis_node													0
NDFIP2	dis_node													0
NDRG1	dis_node													0
NDUFB6	dis_node													0
NECAB1	dis_node													0
NEK6	dis_node													0
NELL2	dis_node													0
NEUROD1	dis_node													0
NFE2L3	dis_node													0
NHLH1	dis_node													0
NIN	dis_node									1				1
NKX2-1	dis_node													0
NKX2-2	dis_node													0
NOTCH4	dis_node	1												1
NPFFR2	dis_node													0
NPTX2	dis_node													0
NR1H3	dis_node													0
NRIP3	dis_node													0
NRXN2	dis_node													0
NT5DC3	dis_node													0
NTAN1	dis_node													0
NUDT16L1	dis_node													0
NUDT9	dis_node													0
OLIG2	dis_node													0
OPCML	dis_node													0
OSBPL6	dis_node													0
OXR1	dis_node													0
PANK1	dis_node													0
PARP11	dis_node													0
PARP6	dis_node													0
PCGF2	dis_node													0
PDCD6	dis_node													0
PGM1	dis_node													0
PHLDB2	dis_node			1										1
PIGW	dis_node													0
PIK3R2	dis_node	1						1		1			1	4
PITX1	dis_node					1								1
PKP2	dis_node													0
PLA2G3	dis_node													0
PLA2G4C	dis_node	1				1								2
PLEKHA7	dis_node													0
PLEKHG1	dis_node													0
PLTP	dis_node													0
PLXNA3	dis_node													0
PMP22	dis_node													0
PNKP	dis_node													0
POLA1	dis_node													0
POLE	dis_node													0
POLR3B	dis_node													0
POP5	dis_node													0
PPHLN1	dis_node													0
PPIC	dis_node													0
PPIG	dis_node													0
PPP1R16B	dis_node													0
PPPDE1	dis_node													0
PRMT3	dis_node													0
PROK2	dis_node													0
PROX1	dis_node													0
PSD2	dis_node													0
PSMB1	dis_node								1					1
PSME1	dis_node													0
PTPN9	dis_node													0
PTPRF	dis_node													0
RAB26	dis_node													0
RAB2B	dis_node													0
RAB40B	dis_node													0
RAB6B	dis_node													0
RACGAP1	dis_node													0
RALB	dis_node										1			1
RALGDS	dis_node										1			1
RALGPS2	dis_node													0
RASL12	dis_node													0
RASSF2	dis_node													0
RCAN1	dis_node													0
REV1	dis_node													0
REXO1	dis_node													0
RFC5	dis_node													0
RGS2	dis_node													0
RGS20	dis_node													0
RGS4	dis_node													0
RHOBTB3	dis_node													0
RHOC	dis_node	1	1					1			1			4
RIC8B	dis_node													0
RIOK1	dis_node													0
RP9	dis_node													0
RPS6KC1	dis_node									1				1
RPUSD2	dis_node													0
RRAS	dis_node			1				1				1		3
RTN1	dis_node													0
RYR3	dis_node													0
SALL1	dis_node													0
SALL2	dis_node													0
SARS2	dis_node													0
SASS6	dis_node													0
SCAPER	dis_node													0
SCARB2	dis_node													0
SCG2	dis_node					1								1
SCHIP1	dis_node													0
SDHAF2	dis_node													0
SELI	dis_node													0
SEMA5A	dis_node													0
SENP6	dis_node													0
SEPHS2	dis_node													0
SERBP1	dis_node													0
SERINC1	dis_node													0
SESN2	dis_node													0
SETDB1	dis_node													0
SF3B2	dis_node													0
SFMBT1	dis_node													0
SFPQ	dis_node													0
SFRS1	dis_node													0
SFRS3	dis_node													0
SGPP2	dis_node													0
SH2D5	dis_node													0
SH3PXD2A	dis_node													0
SH3RF1	dis_node													0
SHANK3	dis_node													0
SHMT1	dis_node													0
SIX3	dis_node													0
SLC11A2	dis_node													0
SLC25A23	dis_node													0
SLC25A29	dis_node													0
SLC32A1	dis_node													0
SLC7A3	dis_node													0
SMPDL3A	dis_node													0
SNRNP200	dis_node													0
SNTB1	dis_node													0
SOSTDC1	dis_node													0
SOX5	dis_node													0
SPARCL1	dis_node													0
SPG20	dis_node													0
SPOCK2	dis_node													0
STK40	dis_node													0
STMN2	dis_node													0
STX12	dis_node								1					1
STXBP6	dis_node													0
SULT1A1	dis_node													0
SUPT3H	dis_node													0
SVIL	dis_node													0
TAPT1	dis_node													0
TATDN2	dis_node													0
TC2N	dis_node													0
TCF25	dis_node													0
TCF7L2	dis_node	1												1		1
TEAD4	dis_node													0
TERF2IP	dis_node													0
TEX2	dis_node													0
TGFBI	dis_node													0
THOP1	dis_node													0
TLE1	dis_node													0		1
TLE4	dis_node													0		1
TMEFF2	dis_node													0
TMEM1	dis_node													0
TMEM14B	dis_node													0
TMEM165	dis_node													0
TNNC1	dis_node													0
TOP2A	dis_node													0
TP53INP1	dis_node													0
TPD52L1	dis_node													0
TRAIP	dis_node													0
TRAK2	dis_node													0
TRIB2	dis_node													0
TRIB3	dis_node													0
TRIP10	dis_node													0
TRPM1	dis_node													0
TRPT1	dis_node													0
TSPAN13	dis_node													0
TSPYL4	dis_node													0
TTC1	dis_node													0
TTC14	dis_node													0
TUBB3	dis_node		1				1							2
TXNDC9	dis_node													0
TYRO3	dis_node													0
UBE2D2	dis_node													0
UBE2J2	dis_node								1					1
UBE2N	dis_node													0
UBE2Q1	dis_node													0
UBL3	dis_node													0
UBXN1	dis_node													0
UNC5B	dis_node													0
UROD	dis_node													0
UTP14A	dis_node													0
UTP18	dis_node													0
VAPA	dis_node													0
VAT1L	dis_node						1							1
VEGFB	dis_node													0
VRK1	dis_node													0
WARS	dis_node													0
WBSCR27	dis_node													0
WDR5	dis_node													0
WDR60	dis_node													0
WDR75	dis_node													0
WFS1	dis_node													0
XKR6	dis_node													0
YIPF5	dis_node													0
ZBTB44	dis_node													0
ZMPSTE24	dis_node													0
ZNF124	dis_node													0
ZNF146	dis_node													0
ZNF514	dis_node													0
ZNF706	dis_node													0
ZWINT	dis_node													0
AARS	both_node													0
AASS	both_node													0
ABCA1	both_node													0
ABCB6	both_node													0
ABCC4	both_node													0
ABCE1	both_node													0
ABCF1	both_node													0
ABHD11	both_node													0
ABHD14A	both_node													0
ABLIM1	both_node													0
ACADM	both_node													0
ACAP1	both_node													0
ACAT1	both_node													0
ACAT2	both_node													0
ACCN2	both_node													0
ACHE	both_node													0
ACLY	both_node													0
ACO1	both_node													0
ACOT7	both_node													0
ACSL3	both_node													0
ACTA1	both_node		1				1							2		1
ACTB	both_node		1				1	1						3
ACTC1	both_node		1				1							2		1
ACTG2	both_node		1				1							2		1
ACTN1	both_node							1						1
ACTN3	both_node													0
ACTR10	both_node													0
ACVR1	both_node											1		1
ACVR1B	both_node					1						1		2		1
ACVR2A	both_node					1						1		2
ACY1	both_node													0
ADAM23	both_node													0
ADAMTS1	both_node													0
ADAR	both_node													0
ADI1	both_node													0
ADIPOR1	both_node					1								1
ADM	both_node													0
ADORA2B	both_node													0
ADRA2A	both_node													0
ADRM1	both_node													0
ADSL	both_node													0
AES	both_node													0		1
AFG3L2	both_node													0
AFP	both_node													0
AGTRAP	both_node													0
AHSA1	both_node													0
AIFM1	both_node													0
AIG1	both_node													0
AIMP2	both_node													0
AK2	both_node													0
AKAP1	both_node													0
AKAP12	both_node													0
AKIRIN1	both_node													0
AKR1B1	both_node													0
AKT1	both_node	1		1	1	1	1				1		1	7
ALAS1	both_node													0
ALCAM	both_node													0
ALDOC	both_node													0
ALG3	both_node													0
ALG8	both_node													0
ALPL	both_node													0
AMD1	both_node													0
AMMECR1	both_node													0
AMOT	both_node													0
ANAPC1	both_node													0
ANKMY2	both_node													0
ANKRD6	both_node													0		1
ANXA1	both_node													0
ANXA2	both_node													0
ANXA3	both_node													0
ANXA5	both_node					1								1
AP1G2	both_node													0
AP1M2	both_node													0
AP2M1	both_node													0
AP2S1	both_node													0
AP3D1	both_node													0
APBB3	both_node													0
APEX1	both_node													0
APEX2	both_node													0
APIP	both_node													0
APITD1	both_node													0
APLP1	both_node													0
APOA1BP	both_node													0
APOBEC3B	both_node													0
APP	both_node													0
APRT	both_node													0
AQR	both_node													0
ARAP3	both_node													0
ARF4	both_node						1	1						2
ARFGEF1	both_node													0
ARFGEF2	both_node													0
ARHGAP1	both_node	1	1							1			1	4
ARHGAP22	both_node													0
ARHGAP23	both_node													0
ARHGAP8	both_node	1	1							1			1	4
ARHGDIA	both_node													0
ARHGDIB	both_node													0
ARHGEF1	both_node		1											1
ARHGEF5	both_node													0
ARIH2	both_node													0
ARL3	both_node													0
ARL4A	both_node						1							1
ARL6IP5	both_node													0
ARMCX2	both_node													0
ARMCX3	both_node													0
ARNTL	both_node													0
ARPC1B	both_node		1				1	1						3
ARPC2	both_node		1					1						2
ARPC4	both_node		1											1
ARPC5	both_node		1				1	1						3
ARPC5L	both_node		1				1	1						3
ARRB1	both_node													0		1
ARRDC2	both_node													0
ARRDC3	both_node													0
ARSB	both_node													0
ASCC3	both_node													0
ASF1A	both_node													0
ASGR1	both_node													0
ASNS	both_node													0
ASS1	both_node													0
ATAD3A	both_node													0
ATF3	both_node					1								1
ATF4	both_node													0
ATF5	both_node													0
ATF6	both_node													0
ATG16L1	both_node													0
ATG3	both_node													0
ATG4C	both_node													0
ATIC	both_node													0
ATP1B1	both_node													0
ATP1B3	both_node													0
ATP2A2	both_node													0
ATP2A3	both_node													0
ATP2C1	both_node													0
ATP5D	both_node													0
ATP5G1	both_node													0
ATP5H	both_node													0
ATP5J2	both_node													0
ATP6AP1	both_node													0
ATP6V0C	both_node													0
ATP6V0D1	both_node													0
ATP6V1B1	both_node													0
ATP6V1G2	both_node													0
ATP9A	both_node													0
AURKA	both_node													0
AURKAIP1	both_node													0
AURKB	both_node													0
AVEN	both_node													0
AXIN2	both_node	1												1		1
AZIN1	both_node													0
B3GNT2	both_node													0
BAD	both_node	1								1			1	3
BAG5	both_node													0
BAMBI	both_node											1		1
BANF1	both_node													0
BARHL1	both_node													0
BAT2	both_node													0
BAX	both_node						1							1
BAZ1A	both_node													0
BAZ2B	both_node													0
BBS1	both_node													0
BCAR1	both_node							1						1
BCAR3	both_node													0
BCCIP	both_node													0
BCL11A	both_node													0
BCL2L1	both_node													0
BCL6	both_node													0
BCLAF1	both_node													0
BEND3	both_node													0
BEND5	both_node													0
BEND7	both_node													0
BEX2	both_node													0
BHLHB2	both_node													0
BID	both_node													0
BIRC5	both_node	1												1
BLVRA	both_node													0
BMP2K	both_node													0
BMP6	both_node					1						1		2
BMPR1A	both_node					1						1		2		1
BNC1	both_node													0
BNIP3L	both_node													0
BNIPL	both_node													0
BOK	both_node													0
BOLA2	both_node													0
BOP1	both_node													0
BRCA1	both_node													0
BRIX1	both_node													0
BRMS1	both_node													0
BSN	both_node													0
BSPRY	both_node													0
BUB1	both_node													0
BUB1B	both_node													0
BUB3	both_node													0
C10orf2	both_node													0
C11orf51	both_node													0
C11orf73	both_node													0
C11orf84	both_node													0
C14orf166	both_node													0
C14orf169	both_node													0
C16orf48	both_node													0
C18orf56	both_node													0
C1GALT1	both_node													0
C1QBP	both_node													0
C1S	both_node													0
C1orf144	both_node													0
C1orf168	both_node													0
C1orf94	both_node													0
C20orf24	both_node													0
C2orf47	both_node													0
C3orf75	both_node													0
C5orf13	both_node													0
C6orf106	both_node													0
C6orf211	both_node													0
C7orf11	both_node													0
C7orf20	both_node													0
C7orf25	both_node													0
C7orf50	both_node													0
C9orf114	both_node													0
C9orf9	both_node													0
CA2	both_node													0
CABYR	both_node													0
CACNB3	both_node													0
CACYBP	both_node													0
CADM1	both_node													0
CALB2	both_node													0
CALCA	both_node													0
CALD1	both_node													0
CALR	both_node													0
CAMK2D	both_node													0
CAMKV	both_node													0
CAPZB	both_node													0
CARD11	both_node													0
CARS	both_node													0
CASP3	both_node						1							1
CASP6	both_node						1							1
CASP9	both_node	1											1	2
CAV1	both_node					1		1						2
CAV2	both_node													0
CBFB	both_node													0
CBR1	both_node													0
CBS	both_node													0
CBX3	both_node													0
CCBL2	both_node													0
CCDC59	both_node													0
CCDC6	both_node													0
CCDC90B	both_node													0
CCDC99	both_node													0
CCL2	both_node													0
CCL26	both_node													0
CCNA2	both_node													0
CCNB1	both_node													0
CCNC	both_node													0
CCND2	both_node													0
CCNE1	both_node								1					1
CCNG2	both_node													0
CCT3	both_node													0
CCT6A	both_node													0
CCT7	both_node													0
CD247	both_node													0
CD2AP	both_node													0
CD36	both_node													0
CD47	both_node													0
CD74	both_node													0
CD79B	both_node													0
CD83	both_node													0
CD9	both_node													0
CDA	both_node													0
CDC123	both_node													0
CDC16	both_node													0
CDC20	both_node													0
CDC25A	both_node													0
CDC25C	both_node													0
CDC26	both_node													0
CDC42BPA	both_node													0
CDC45L	both_node													0
CDCA4	both_node													0
CDCA5	both_node													0
CDCA7	both_node													0
CDCA7L	both_node													0
CDH1	both_node													0		1
CDH2	both_node													0		1
CDK2AP1	both_node													0
CDK5RAP3	both_node													0
CDK7	both_node													0
CDKN1C	both_node													0
CDKN3	both_node													0
CDO1	both_node													0
CDS1	both_node													0
CDT1	both_node													0
CDYL	both_node													0
CEACAM1	both_node													0
CEBPZ	both_node													0
CECR5	both_node													0
CENPA	both_node													0
CENPK	both_node													0
CENPM	both_node													0
CENPN	both_node													0
CENTA1	both_node													0
CEP55	both_node													0
CER1	both_node													0		1
CGN	both_node													0
CHAF1A	both_node													0
CHCHD3	both_node													0
CHEK1	both_node													0
CHEK2	both_node													0
CHGA	both_node													0
CHGB	both_node													0
CHIC2	both_node													0
CHN2	both_node													0
CHPF	both_node													0
CHRNA9	both_node													0
CHST13	both_node													0
CHST15	both_node													0
CHST3	both_node													0
CIB1	both_node													0
CINP	both_node													0
CIRH1A	both_node													0
CISD1	both_node													0
CITED2	both_node											1		1
CKB	both_node													0
CKS1B	both_node													0
CLDN3	both_node													0
CLDN7	both_node													0
CLEC11A	both_node													0
CLIP3	both_node													0
CLN8	both_node													0
CMPK1	both_node													0
CNDP2	both_node													0
CNN1	both_node													0
COASY	both_node													0
COBL	both_node													0
COCH	both_node													0
COL1A1	both_node							1						1
COL2A1	both_node							1						1
COL4A5	both_node							1						1
COL5A2	both_node							1						1
COL6A3	both_node							1						1
COL9A3	both_node							1						1
COMMD3	both_node													0
COMT	both_node													0
COPB2	both_node													0
COPS5	both_node									1				1
COPS6	both_node													0
COQ3	both_node													0
CPNE1	both_node													0
CPNE4	both_node													0
CPT1A	both_node													0
CREB5	both_node													0
CRELD1	both_node													0
CRELD2	both_node													0
CRIP2	both_node													0
CRLF3	both_node													0
CRLS1	both_node													0
CSAD	both_node													0
CSDA	both_node					1								1
CSE1L	both_node													0
CSNK2A1	both_node								1					1		1
CSRP1	both_node													0
CST3	both_node													0
CSTF2	both_node													0
CTDSP1	both_node													0
CTDSPL	both_node													0
CTGF	both_node													0
CTH	both_node													0
CTNNAL1	both_node													0		1
CTPS	both_node													0
CTSA	both_node													0
CTSB	both_node													0
CTSC	both_node													0
CTSK	both_node													0
CTTN	both_node													0
CUEDC2	both_node													0
CXCL1	both_node													0
CXCL12	both_node													0
CXCL5	both_node													0
CXCL6	both_node													0
CXCR4	both_node													0
CXorf57	both_node													0
CYB5A	both_node													0
CYB5R2	both_node													0
CYC1	both_node						1							1
CYP2S1	both_node													0
CYR61	both_node													0
DACH1	both_node													0
DACT1	both_node													0		1
DAPK1	both_node													0
DARS2	both_node													0
DAZAP1	both_node													0
DAZAP2	both_node													0
DAZL	both_node													0
DBC1	both_node													0
DBI	both_node													0
DBT	both_node													0
DCLK1	both_node													0
DCPS	both_node													0
DCTN1	both_node						1							1
DCTN3	both_node						1							1
DCUN1D1	both_node													0
DCX	both_node													0
DDHD2	both_node													0
DDX1	both_node													0
DDX18	both_node													0
DDX21	both_node													0
DDX27	both_node													0
DDX39	both_node													0
DDX46	both_node													0
DDX54	both_node													0
DEDD	both_node													0
DEK	both_node													0
DEPDC1	both_node													0
DEPDC1B	both_node													0
DGCR8	both_node													0
DGUOK	both_node													0
DHCR7	both_node													0
DHX15	both_node													0
DHX29	both_node													0
DHX37	both_node													0
DHX58	both_node													0
DIABLO	both_node													0
DIAPH1	both_node		1											1
DIAPH3	both_node		1											1
DIDO1	both_node													0
DIO2	both_node													0
DIS3L	both_node													0
DKC1	both_node													0
DLGAP5	both_node													0
DLK1	both_node	1												1
DLL1	both_node	1												1
DMAP1	both_node													0
DNAJB2	both_node													0
DNAJB6	both_node													0
DNAJC7	both_node													0
DNAJC9	both_node													0
DNALI1	both_node													0
DNM1L	both_node													0
DNMT3A	both_node													0
DNMT3B	both_node													0
DOCK2	both_node													0
DPH2	both_node													0
DPH3	both_node													0
DPP3	both_node													0
DPP9	both_node													0
DPPA2	both_node													0
DPPA4	both_node													0
DPY30	both_node													0
DPYSL3	both_node													0
DPYSL4	both_node													0
DSCC1	both_node													0
DSN1	both_node													0
DSTN	both_node		1											1
DTL	both_node													0
DTNA	both_node							1						1
DUSP1	both_node					1								1
DUSP16	both_node													0
DUSP23	both_node													0
DUSP5	both_node													0
DUSP6	both_node													0
DUT	both_node													0
DYNLL1	both_node						1							1
DYNLT1	both_node													0
E2F7	both_node													0
EBI3	both_node													0
EBNA1BP2	both_node													0
ECD	both_node													0
ECSCR	both_node													0
EDN1	both_node													0		1
EDNRB	both_node													0
EEF1A1	both_node													0
EEF1E1	both_node													0
EEF2K	both_node													0
EFEMP1	both_node													0
EFEMP2	both_node													0
EFHD1	both_node													0
EFNA1	both_node													0
EFNB1	both_node	1												1
EFNB3	both_node													0
EFTUD2	both_node													0
EHD4	both_node													0
EIF1AX	both_node													0
EIF2AK2	both_node													0
EIF2B4	both_node													0
EIF2C3	both_node													0
EIF2S2	both_node													0
EIF3B	both_node													0
EIF3G	both_node													0
EIF4A3	both_node													0
EIF4E	both_node													0
EIF4E3	both_node													0
EIF4EBP1	both_node													0
EIF4EBP2	both_node													0
EIF4G1	both_node													0
EIF5A	both_node													0
EIF5B	both_node													0
EIF6	both_node													0
EMG1	both_node													0
EMX1	both_node													0
ENO3	both_node													0
ENOPH1	both_node													0
ENPP1	both_node													0
ENSA	both_node													0
ENY2	both_node													0
EPB41L2	both_node													0
EPB41L3	both_node													0
EPB41L5	both_node													0
EPCAM	both_node													0
EPHA1	both_node													0
EPHA4	both_node													0
EPHB1	both_node													0
EPHB2	both_node	1												1
EPHX1	both_node													0
EPRS	both_node													0
ERBB2	both_node			1										1
ERBB3	both_node			1										1
ERCC1	both_node													0
ERCC6L	both_node													0
ETFB	both_node													0
ETS1	both_node	1								1	1		1	4
ETV4	both_node													0
ETV5	both_node													0
EWSR1	both_node													0
EXO1	both_node													0
EXOC2	both_node										1			1
EXOSC1	both_node													0
EXOSC3	both_node													0
EXOSC9	both_node													0
EZR	both_node													0
F11R	both_node													0
FA2H	both_node													0
FABP3	both_node													0
FABP5	both_node													0
FADD	both_node													0
FAM124B	both_node													0
FAM46B	both_node													0
FAM83H	both_node													0
FAM86A	both_node													0
FAM98A	both_node													0
FANCD2	both_node													0
FANCI	both_node													0
FARS2	both_node													0
FASTK	both_node													0
FBLN1	both_node													0
FBN2	both_node													0
FBP1	both_node													0
FBXO10	both_node													0
FBXO28	both_node													0
FBXO5	both_node													0
FBXW5	both_node													0
FCHO1	both_node													0
FDFT1	both_node													0
FECH	both_node													0
FEN1	both_node													0
FERMT2	both_node													0
FEZ1	both_node													0
FGF12	both_node				1									1
FGF19	both_node													0
FGF2	both_node													0
FGFR1	both_node	1			1									2
FGFR4	both_node				1									1
FHL2	both_node													0
FHOD1	both_node													0
FKBP3	both_node													0
FKBP4	both_node													0
FKBP5	both_node													0
FLAD1	both_node													0
FLII	both_node													0
FLJ10374	both_node													0
FOLR1	both_node													0
FOXA2	both_node													0
FOXK1	both_node													0
FOXM1	both_node													0
FOXO1	both_node													0
FRAP1	both_node													0
FRMD6	both_node													0
FRZB	both_node	1												1		1
FSCN1	both_node													0
FTL	both_node													0
FUS	both_node													0
FXYD1	both_node													0
FXYD6	both_node													0
FXYD7	both_node													0
FYN	both_node							1	1					2
FYTTD1	both_node													0
FZD2	both_node	1												1		1
FZD5	both_node	1												1		1
FZD7	both_node													0		1
G3BP1	both_node													0
GABARAPL2	both_node													0
GABBR2	both_node													0
GABRA5	both_node													0
GABRB3	both_node													0
GAD1	both_node													0
GADD45G	both_node													0
GADD45GIP1	both_node													0
GAL	both_node													0
GALNT1	both_node													0
GALNT9	both_node													0
GAP43	both_node													0
GAR1	both_node													0
GARS	both_node													0
GART	both_node													0
GAS6	both_node													0
GAS7	both_node													0
GCAT	both_node													0
GCDH	both_node													0
GCLM	both_node													0
GCSH	both_node													0
GDAP1	both_node													0
GDF15	both_node											1		1
GEMIN4	both_node													0
GFPT1	both_node													0
GFPT2	both_node													0
GGH	both_node													0
GINS2	both_node													0
GINS4	both_node													0
GLI2	both_node													0	1
GLIPR2	both_node													0
GLMN	both_node													0
GLO1	both_node													0
GLRX3	both_node													0
GLS2	both_node													0
GMDS	both_node													0
GMNN	both_node													0
GNA12	both_node													0
GNA14	both_node													0		1
GNE	both_node													0
GNG2	both_node					1								1		1
GNG3	both_node													0		1
GNL2	both_node													0
GNL3	both_node													0
GNL3L	both_node													0
GOLPH3L	both_node													0
GORASP2	both_node													0
GOT2	both_node													0
GPC3	both_node													0
GPM6A	both_node													0
GPR176	both_node													0
GPSM1	both_node													0
GPT2	both_node													0
GRB10	both_node													0
GRB14	both_node	1												1
GRB7	both_node	1												1
GRHL3	both_node													0
GRK4	both_node													0
GRM3	both_node													0
GRPEL2	both_node													0
GRPR	both_node													0
GRSF1	both_node													0
GRTP1	both_node													0
GRWD1	both_node													0
GSC	both_node													0
GSDMB	both_node													0
GSN	both_node													0
GSS	both_node													0
GSTP1	both_node													0
GSTT1	both_node													0
GTF2E1	both_node													0
GTF2E2	both_node													0
GTF3A	both_node													0
GTF3C1	both_node													0
GTF3C2	both_node													0
GTF3C6	both_node													0
GUF1	both_node													0
GULP1	both_node													0
H1F0	both_node													0
H2AFY	both_node													0
H2AFY2	both_node													0
HABP4	both_node													0
HAPLN3	both_node													0
HAT1	both_node													0
HBA2	both_node													0
HCLS1	both_node													0
HDAC3	both_node													0		1
HELLS	both_node													0		1
HERC5	both_node													0
HERC6	both_node													0
HES4	both_node													0
HES6	both_node													0
HHEX	both_node													0
HIF1A	both_node	1											1	2
HIP2	both_node													0
HIST2H2AC	both_node													0
HK1	both_node													0
HLA-DOA	both_node													0
HMBS	both_node													0
HMGA1	both_node													0
HMGB3	both_node													0
HMGCS1	both_node													0
HMMR	both_node													0
HMOX1	both_node													0
HNRNPA1	both_node													0
HNRNPA3	both_node													0
HNRNPAB	both_node													0
HNRNPD	both_node													0
HNRNPL	both_node													0
HNRNPM	both_node													0
HNRPA2B1	both_node													0
HNRPM	both_node													0
HOMER2	both_node													0
HPRT1	both_node													0
HPS5	both_node													0
HRAS	both_node	1		1	1	1		1		1	1	1	1	9
HS3ST3A1	both_node													0
HS3ST5	both_node													0
HSD17B12	both_node													0
HSD17B4	both_node													0
HSP90AA1	both_node													0
HSP90B1	both_node													0
HSPA14	both_node													0
HSPA2	both_node					1			1					2
HSPA4	both_node													0
HSPA4L	both_node													0
HSPA9	both_node					1			1					2
HSPB1	both_node	1											1	2
HSPB8	both_node													0
HSPBP1	both_node													0
HSPD1	both_node													0
HSPE1	both_node													0
HTR3A	both_node					1								1
IARS	both_node													0
ICAM2	both_node													0
ICAM3	both_node													0
ICMT	both_node													0
ID1	both_node													0
IDE	both_node													0
IDH1	both_node													0
IDI1	both_node													0
IER3	both_node													0
IER3IP1	both_node													0
IFI6	both_node													0
IFIT1	both_node													0
IFRD2	both_node													0
IGF2R	both_node													0
IGFBP3	both_node													0
IGFBP4	both_node													0
IGFBP5	both_node													0
IGFBP6	both_node													0
IKBKE	both_node													0
IL27RA	both_node													0
ILF2	both_node													0
ILK	both_node							1						1
IMP3	both_node													0
INA	both_node													0
INF2	both_node													0
INO80	both_node													0		1
INO80D	both_node													0
INPP1	both_node													0
INSIG1	both_node													0
INSM1	both_node													0
IPO11	both_node													0
IQGAP1	both_node													0
IQGAP2	both_node													0
IRF3	both_node													0
IRX2	both_node													0
ISCU	both_node													0
ITFG1	both_node													0
ITGA3	both_node							1						1
ITGA6	both_node							1						1
ITGAV	both_node							1						1
ITGB1	both_node					1		1						2
ITGB1BP3	both_node													0
ITGB4BP	both_node													0
ITGB5	both_node							1						1
ITPA	both_node													0
ITPK1	both_node													0
ITPR3	both_node					1				1				2		1
ITSN1	both_node													0
JAK1	both_node	1								1				2
JAM2	both_node													0
JMJD1A	both_node													0
JTB	both_node													0
JUN	both_node	1				1	1			1	1	1		6
KAL1	both_node													0
KAT2B	both_node					1								1
KATNB1	both_node													0
KCND2	both_node													0
KCNK6	both_node													0
KCNQ2	both_node													0
KDR	both_node	1											1	2
KEAP1	both_node													0
KIAA0020	both_node													0
KIAA0196	both_node													0
KIAA0368	both_node													0
KIAA0564	both_node													0
KIAA0664	both_node													0
KIAA1033	both_node													0
KIAA1279	both_node													0
KIAA1598	both_node													0
KIF11	both_node													0
KIF1C	both_node													0
KIF20B	both_node													0
KIF23	both_node													0
KIFAP3	both_node													0
KIT	both_node													0
KLF4	both_node													0
KLHL28	both_node													0
KLHL5	both_node													0
KLKB1	both_node													0
KPNA2	both_node													0
KPTN	both_node													0
LAMA1	both_node							1						1
LAMB1	both_node							1						1
LAMC2	both_node							1						1
LAMC3	both_node							1						1
LAMP1	both_node													0
LARP1	both_node													0
LARP1B	both_node													0
LARP6	both_node													0
LARS	both_node													0
LARS2	both_node													0
LAS1L	both_node													0
LASP1	both_node													0
LCK	both_node							1	1					2
LCP1	both_node													0
LDHA	both_node													0
LDLR	both_node													0
LDLRAP1	both_node													0
LECT1	both_node													0
LEFTY1	both_node											1		1
LEFTY2	both_node											1		1
LEMD3	both_node													0
LEO1	both_node													0
LEPREL1	both_node													0
LGALS1	both_node													0
LGALS3BP	both_node													0
LIG1	both_node													0
LIMA1	both_node													0
LIMS1	both_node							1						1
LMCD1	both_node													0
LMNA	both_node													0
LMNB2	both_node													0
LMO1	both_node													0
LMO3	both_node													0
LMO4	both_node													0
LOC100130932	both_node													0
LONP1	both_node													0
LOXL4	both_node													0
LRIG1	both_node													0
LRP2	both_node													0
LRP8	both_node													0
LRRC16A	both_node													0
LSM1	both_node													0
LSM10	both_node													0
LSM12	both_node													0
LSM3	both_node													0
LSM6	both_node													0
LSS	both_node													0
LTBP3	both_node													0
LTV1	both_node													0
LYAR	both_node													0
LYN	both_node								1					1
LYPLA2	both_node													0
LZTS1	both_node													0
MAD2L1	both_node													0
MAD2L1BP	both_node													0
MAD2L2	both_node													0
MAEA	both_node													0
MAG	both_node													0
MAGED1	both_node													0
MAK16	both_node													0
MAL2	both_node													0
MAMDC2	both_node													0
MAP1A	both_node													0
MAP1LC3A	both_node													0
MAP1LC3C	both_node													0
MAP2	both_node													0
MAP4	both_node													0
MAP4K1	both_node					1								1
MAP6	both_node													0
MAP7	both_node													0
MAPK1	both_node	1		1	1	1		1	1	1	1	1	1	10
MAPK10	both_node	1		1	1	1	1	1	1	1	1	1		10
MAPK13	both_node			1	1	1		1			1	1		6
MAPK8IP3	both_node													0
MAPK9	both_node	1		1	1	1	1	1	1	1	1	1		10
MAPKAPK5	both_node													0
MARS	both_node													0
MARS2	both_node													0
MASTL	both_node													0
MAT2B	both_node													0
MATN2	both_node													0
MATR3	both_node													0
MCM10	both_node													0
MCM2	both_node													0
MCM3	both_node													0
MCM4	both_node													0
MCM5	both_node													0
MCM6	both_node													0
MCM7	both_node													0
MCRS1	both_node													0
MDK	both_node													0
MDM2	both_node													0
MDN1	both_node													0
MED14	both_node													0
MED20	both_node													0
MED4	both_node													0
MEGF10	both_node													0
MEIS2	both_node													0
MELK	both_node													0
MEST	both_node													0
METAP1	both_node													0
METTL1	both_node													0
METTL3	both_node													0
METTL7A	both_node													0
MEX3B	both_node													0
MEX3C	both_node													0
MGAT4B	both_node													0
MICALL1	both_node							1						1
MICB	both_node													0
MINA	both_node													0
MITD1	both_node													0
MKI67IP	both_node													0
MKLN1	both_node													0
MLF1IP	both_node													0
MLF2	both_node													0
MLH1	both_node													0
MME	both_node													0
MMGT1	both_node													0
MMP25	both_node													0
MMP9	both_node													0
MOAP1	both_node													0
MOGS	both_node													0
MPP1	both_node								1					1
MPP6	both_node													0
MPPED1	both_node													0
MPRIP	both_node													0
MPZL1	both_node													0
MRI1	both_node													0
MRPL11	both_node													0
MRPL12	both_node													0
MRPL13	both_node													0
MRPL15	both_node													0
MRPL16	both_node													0
MRPL17	both_node													0
MRPL2	both_node													0
MRPL20	both_node													0
MRPL21	both_node													0
MRPL23	both_node													0
MRPL24	both_node													0
MRPL27	both_node													0
MRPL3	both_node													0
MRPL32	both_node													0
MRPL37	both_node													0
MRPL38	both_node			1										1
MRPL4	both_node													0
MRPL41	both_node													0
MRPL42	both_node													0
MRPL44	both_node													0
MRPL46	both_node													0
MRPL51	both_node													0
MRPL52	both_node													0
MRPL55	both_node													0
MRPS10	both_node													0
MRPS11	both_node													0
MRPS12	both_node													0
MRPS17	both_node													0
MRPS18B	both_node													0
MRPS26	both_node													0
MRPS28	both_node													0
MRPS30	both_node													0
MRPS34	both_node													0
MRPS35	both_node													0
MRPS7	both_node													0
MRPS9	both_node													0
MRTO4	both_node													0
MSH6	both_node													0
MSI1	both_node													0
MSN	both_node													0
MT1F	both_node													0
MT1X	both_node													0
MT2A	both_node													0
MTA3	both_node													0
MTAP	both_node													0
MTFMT	both_node													0
MTG1	both_node													0
MTHFD1	both_node													0
MTHFD1L	both_node													0
MTHFD2	both_node													0
MTIF2	both_node													0
MTO1	both_node													0
MTRF1L	both_node													0
MTSS1	both_node													0
MTX1	both_node													0
MUC4	both_node													0
MVD	both_node													0
MX1	both_node													0
MXD4	both_node													0
MYB	both_node													0
MYBL2	both_node													0
MYC	both_node									1				1		1
MYL6	both_node													0
MYL9	both_node													0
MYO1D	both_node													0
MYOZ3	both_node													0
NAALAD2	both_node													0
NACC1	both_node													0
NAE1	both_node													0
NAGK	both_node													0
NANOG	both_node													0
NANS	both_node													0
NAP1L2	both_node													0
NAP1L3	both_node													0
NAP1L5	both_node													0
NARG1	both_node													0
NARS	both_node													0
NARS2	both_node													0
NASP	both_node													0
NAV1	both_node													0
NCALD	both_node													0
NCAPD3	both_node													0
NCAPG2	both_node													0
NCBP2	both_node													0
NCL	both_node													0
NDN	both_node													0
NDUFA8	both_node													0
NDUFAB1	both_node													0
NDUFB9	both_node													0
NDUFS3	both_node													0
NDUFV2	both_node								1					1
NEDD9	both_node													0
NEFL	both_node													0
NEFM	both_node													0
NEK3	both_node													0
NEU1	both_node													0
NFE2	both_node													0
NFIB	both_node													0
NFKBIB	both_node													0
NGLY1	both_node													0
NHP2	both_node													0
NIP7	both_node													0
NKD2	both_node													0		1
NLN	both_node													0
NLRP12	both_node													0
NLRP2	both_node													0
NMB	both_node													0
NME1	both_node													0
NME1-NME2	both_node													0
NME2	both_node													0
NME3	both_node													0
NODAL	both_node											1		1
NOL11	both_node													0
NOL7	both_node													0
NOLC1	both_node													0
NOP10	both_node													0
NOP16	both_node													0
NOP2	both_node													0
NOP56	both_node													0
NOP58	both_node													0
NPW	both_node													0
NQO1	both_node													0
NQO2	both_node													0
NR5A2	both_node					1								1
NRAS	both_node	1		1	1	1		1		1	1	1	1	9
NRBF2	both_node													0
NRCAM	both_node													0
NRK	both_node													0
NRP1	both_node													0
NRP2	both_node													0
NSBP1	both_node													0
NSD1	both_node													0
NSUN2	both_node													0
NSUN5	both_node													0
NTF3	both_node													0
NTHL1	both_node													0
NTM	both_node													0
NTRK2	both_node													0
NTS	both_node													0
NUAK1	both_node													0
NUDC	both_node													0
NUDT1	both_node													0
NUDT15	both_node													0
NUDT5	both_node													0
NUDT6	both_node													0
NUP107	both_node													0
NUP205	both_node													0
NUP35	both_node													0
NUP37	both_node													0
NUP50	both_node													0
NUP62	both_node													0
NUP85	both_node													0
NUP88	both_node													0
NUSAP1	both_node													0
OAT	both_node													0
OBSL1	both_node													0
OCIAD2	both_node													0
ODC1	both_node													0
OGFOD1	both_node													0
OGG1	both_node													0
OIP5	both_node													0
OLFM1	both_node													0
OPRL1	both_node													0
ORC1L	both_node													0
ORC2L	both_node													0
ORC6L	both_node													0
ORM1	both_node													0
OSBP2	both_node													0
OSBPL10	both_node													0
OSTF1	both_node													0
OTUD6B	both_node													0
OTX2	both_node													0
P2RY1	both_node													0
P4HA2	both_node													0
PA2G4	both_node													0
PABPN1	both_node													0
PACSIN1	both_node						1							1
PACSIN3	both_node													0
PAICS	both_node													0
PAK1	both_node	1	1								1			3
PAK1IP1	both_node													0
PALLD	both_node													0
PAPLN	both_node													0
PAPSS2	both_node													0
PARD6A	both_node													0
PARN	both_node													0
PARP1	both_node													0
PARP12	both_node													0
PARVA	both_node							1						1
PAXIP1	both_node													0
PCBD1	both_node													0
PCBP4	both_node													0
PCGF6	both_node													0
PCNA	both_node													0
PCOLCE	both_node													0
PCSK9	both_node													0
PCYT2	both_node													0
PDCD5	both_node													0
PDCL3	both_node													0
PDE4B	both_node													0
PDE6D	both_node													0
PDGFB	both_node	1								1				2
PDGFC	both_node	1												1
PDGFRB	both_node	1												1
PDLIM1	both_node													0
PDLIM3	both_node													0
PDLIM5	both_node													0
PDLIM7	both_node													0
PDPN	both_node													0
PEA15	both_node					1								1
PEG10	both_node													0
PELO	both_node													0
PELP1	both_node													0
PEPD	both_node													0
PFAS	both_node													0
PFDN5	both_node													0
PFKP	both_node													0
PFN1	both_node		1											1
PGAM1	both_node													0
PGAM4	both_node													0
PGAM5	both_node													0
PGRMC1	both_node													0
PHAX	both_node													0
PHB	both_node													0
PHC1	both_node													0
PHC2	both_node													0
PHF10	both_node													0
PHF14	both_node													0
PHF17	both_node													0
PHF19	both_node													0
PHF5A	both_node													0
PHGDH	both_node													0
PHLDA1	both_node													0
PHLDA3	both_node													0
PHLPP1	both_node													0
PIAS2	both_node													0
PICK1	both_node													0
PIF1	both_node													0
PIK3C2A	both_node	1		1	1			1					1	5
PIK3CD	both_node	1		1	1			1		1	1		1	7
PIK3R1	both_node	1				1		1		1			1	5
PIM2	both_node													0
PINX1	both_node													0
PIP4K2A	both_node													0
PITPNB	both_node													0
PKIA	both_node													0
PKM2	both_node													0
PKMYT1	both_node													0
PKN3	both_node													0
PLAGL1	both_node													0
PLAU	both_node													0
PLAUR	both_node													0
PLCD1	both_node													0
PLD3	both_node													0
PLEKHB1	both_node													0
PLEKHO1	both_node													0
PLK4	both_node													0
PLOD2	both_node													0
PLP1	both_node													0
PLS1	both_node													0
PLS3	both_node													0
PMAIP1	both_node													0
PMM2	both_node													0
PNMA2	both_node													0
POLA2	both_node													0
POLE2	both_node													0
POLR2F	both_node													0
POLR2H	both_node													0
POLR2I	both_node													0
POLR2J	both_node													0
POLR2L	both_node													0
POLR3E	both_node													0
POLR3G	both_node													0
POLR3K	both_node													0
POMP	both_node													0
PON2	both_node													0
POP1	both_node													0
POP7	both_node													0
POR	both_node													0
POTEF	both_node													0
POU5F1	both_node													0
PPAN	both_node													0
PPAP2A	both_node													0
PPAP2B	both_node													0
PPAP2C	both_node													0
PPAT	both_node													0
PPFIA1	both_node													0
PPFIBP2	both_node													0
PPIH	both_node													0
PPIL1	both_node													0
PPL	both_node													0
PPM1B	both_node													0
PPM1F	both_node													0
PPM1G	both_node													0
PPP1R1B	both_node													0
PPP2CA	both_node			1	1									2		1
PPP2R1B	both_node				1									1
PPP2R2B	both_node				1									1
PPP2R5A	both_node			1	1									2		1
PPP4C	both_node			1	1									2
PQBP1	both_node													0
PQLC1	both_node													0
PRCP	both_node													0
PRDM5	both_node													0
PRDX1	both_node													0
PRDX4	both_node													0
PRELID1	both_node													0
PRIM1	both_node													0
PRKAR1A	both_node					1								1	1
PRKCDBP	both_node													0
PRKCQ	both_node	1		1	1	1							1	5		1
PRKDC	both_node													0
PRMT6	both_node													0
PRNP	both_node													0
PROCR	both_node													0
PROS1	both_node													0
PRPF38A	both_node													0
PRPS2	both_node													0
PRSS23	both_node													0
PRTFDC1	both_node													0
PSAT1	both_node													0
PSD3	both_node													0
PSIP1	both_node													0
PSMA1	both_node								1					1
PSMA2	both_node								1					1
PSMA3	both_node								1					1
PSMA4	both_node								1					1
PSMA5	both_node								1					1
PSMB10	both_node								1					1
PSMB3	both_node								1					1
PSMB5	both_node													0
PSMB8	both_node													0
PSMB9	both_node													0
PSMC2	both_node													0
PSMC4	both_node													0
PSMC5	both_node													0
PSMD12	both_node													0
PSMD4	both_node													0
PSME3	both_node													0
PSME4	both_node													0
PSMG1	both_node													0
PSPC1	both_node													0
PSPH	both_node													0
PSRC1	both_node													0
PTCH1	both_node													0	1
PTGES2	both_node													0
PTGFRN	both_node													0
PTP4A1	both_node													0
PTPLA	both_node													0
PTPN6	both_node	1			1									2
PTPRG	both_node													0
PTTG1	both_node													0
PUS1	both_node													0
PUS7	both_node													0
PVRL1	both_node													0
PWP1	both_node													0
PYCARD	both_node													0
PYGL	both_node													0
PYGM	both_node													0
RAB17	both_node													0
RAB22A	both_node													0
RAB2A	both_node													0
RAB31	both_node													0
RAB32	both_node													0
RAB34	both_node													0
RAB3C	both_node													0
RAB5A	both_node													0
RAB5C	both_node													0
RAB9A	both_node													0
RABGAP1L	both_node													0
RABGGTB	both_node													0
RAD51AP1	both_node													0
RAD54L	both_node													0
RAGE	both_node													0
RAI1	both_node													0
RAI14	both_node													0
RALGAPA1	both_node													0
RAN	both_node													0
RANBP1	both_node													0
RANGAP1	both_node													0
RAPGEF1	both_node							1						1
RARA	both_node													0
RARRES2	both_node													0
RARRES3	both_node													0
RASIP1	both_node													0
RASSF3	both_node													0
RBBP8	both_node													0
RBM12	both_node													0
RBM3	both_node													0
RBM4	both_node													0
RBM42	both_node													0
RBPJ	both_node	1												1
RBPMS	both_node													0
RBPMS2	both_node													0
RCC2	both_node													0
RCN3	both_node													0
RECQL	both_node													0
REXO2	both_node													0
RFC2	both_node													0
RFC3	both_node													0
RFC4	both_node													0
RFWD3	both_node													0
RFXAP	both_node													0
RGL1	both_node										1			1
RGMB	both_node													0
RGS16	both_node													0
RGS17	both_node													0
RGS5	both_node													0
RGS7	both_node													0
RHBDL3	both_node													0
RHEB	both_node											1		1
RHOQ	both_node			1			1							2
RHOU	both_node		1											1
RIF1	both_node													0
RIN2	both_node													0
RIPK1	both_node													0
RIT2	both_node	1		1	1			1		1	1	1	1	8
RNASEH2A	both_node													0
RNASEH2B	both_node													0
RND3	both_node							1						1
RNF10	both_node													0
RNF114	both_node													0
RNF125	both_node													0
RNF126	both_node													0
RNF138	both_node													0
RNF14	both_node													0
RNF144B	both_node													0
RNMTL1	both_node													0
RNPS1	both_node													0
ROR1	both_node													0
ROR2	both_node													0
RORA	both_node													0
RPA3	both_node													0
RPF2	both_node													0
RPL13	both_node													0
RPL29	both_node													0
RPL34	both_node													0
RPL36A	both_node													0
RPL37	both_node													0
RPL6	both_node													0
RPL8	both_node													0
RPP40	both_node													0
RPS15	both_node													0
RPS21	both_node													0
RPS23	both_node													0
RPS24	both_node													0
RPS26	both_node													0
RPS26P11	both_node													0
RPS6KA1	both_node									1	1			2
RPS6KA2	both_node									1	1			2
RPS7	both_node													0
RRAGA	both_node													0
RRAS2	both_node			1								1		2
RRBP1	both_node													0
RRM1	both_node													0
RRM2B	both_node													0
RRP12	both_node													0
RRP15	both_node													0
RRS1	both_node													0
RSU1	both_node													0
RTCD1	both_node													0
RUNX1T1	both_node													0
RUVBL1	both_node													0
RUVBL2	both_node													0
S100A10	both_node													0
S100A4	both_node													0
S100A6	both_node													0
S1PR3	both_node													0
SAC3D1	both_node					1								1
SAE1	both_node													0
SAFB2	both_node													0
SALL3	both_node													0
SALL4	both_node													0
SAPS1	both_node													0
SAR1B	both_node													0
SASH1	both_node													0
SC4MOL	both_node													0
SCD	both_node													0
SCG3	both_node													0
SCNM1	both_node													0
SCNN1A	both_node													0
SCNN1G	both_node													0
SCO1	both_node													0
SCPEP1	both_node													0
SDAD1	both_node													0
SDCCAG3	both_node													0
SDF2L1	both_node													0
SDHA	both_node													0
SEC11C	both_node													0
SEH1L	both_node													0
SEL1L3	both_node													0
SEMA5B	both_node													0
SEMA6A	both_node													0
SEMG1	both_node													0
SEPHS1	both_node													0
2013-09-03	both_node													0
SERF2	both_node													0
SERPINB4	both_node													0
SERPINB9	both_node													0
SERPINE1	both_node													0
SERPINE2	both_node													0
SERPINF1	both_node													0
SERTAD2	both_node													0
SESN1	both_node													0
SET	both_node													0
SETD3	both_node													0
SF3A3	both_node													0
SF3B4	both_node													0
SFRP1	both_node	1												1		1
SFRP2	both_node													0		1
SFRS10	both_node													0
SFRS13A	both_node													0
SFRS2	both_node													0
SFXN2	both_node													0
SFXN5	both_node													0
SGK	both_node													0
SGK1	both_node													0
SGK3	both_node													0
SGOL1	both_node													0
SGOL2	both_node													0
SH2B3	both_node													0
SH3D19	both_node													0
SH3GL3	both_node						1							1
SH3GLB1	both_node													0
SH3KBP1	both_node													0
SHC1	both_node	1		1	1			1		1	1			6
SHFM1	both_node													0
SHMT2	both_node													0
SIGMAR1	both_node													0
SIL1	both_node													0
SIP1	both_node													0
SIRT1	both_node													0
SIRT5	both_node													0
SIVA	both_node													0
SIVA1	both_node													0
SIX6	both_node													0
SKIL	both_node					1						1		2
SKP1	both_node													0
SLC10A7	both_node													0
SLC25A19	both_node													0
SLC25A26	both_node													0
SLC25A4	both_node													0
SLC30A5	both_node													0
SLC39A14	both_node													0
SLC39A6	both_node													0
SLC3A2	both_node													0
SLC43A3	both_node													0
SLC4A11	both_node													0
SLC7A1	both_node													0
SLC7A5	both_node													0
SLC9A3R1	both_node													0
SLIT2	both_node													0
SLTM	both_node													0
SMAD3	both_node					1						1		2
SMAD7	both_node											1		1
SMAP2	both_node													0
SMARCA2	both_node													0		1
SMARCD3	both_node													0		1
SMC2	both_node													0
SMC4	both_node													0
SMC6	both_node													0
SMG5	both_node													0
SMPDL3B	both_node													0
SMS	both_node													0
SNAP23	both_node													0
SNAP25	both_node													0
SNAP91	both_node													0
SNRNP40	both_node													0
SNRPA	both_node													0
SNRPA1	both_node													0
SNRPB	both_node													0
SNRPB2	both_node													0
SNRPC	both_node													0
[truncated: 2,701 more rows]

## Sheet: 工作表2
ID	status	first	second	third	forth	fifth
AARSD1	dis_node
ABAT	dis_node
ABCC8	dis_node
ACBD6	dis_node
ACIN1	dis_node
ADD3	dis_node
ADM2	dis_node
ADSS	dis_node
AHI1	dis_node
AHNAK	dis_node
AIF1L	dis_node
ALDH1A3	dis_node
ALLC	dis_node
ANAPC11	dis_node
ANK2	dis_node
ANKRD28	dis_node
ANKS1B	dis_node
ANO6	dis_node
AP3B1	dis_node
APH1B	dis_node
APOE	dis_node
ARFGAP3	dis_node
ARFIP1	dis_node
ARID3B	dis_node
ASCL1	dis_node			gnrh
ASF1B	dis_node
ASPM	dis_node
ATP2B4	dis_node
ATP5A1	dis_node
ATP6V0A1	dis_node
ATP6V1A	dis_node
BBS2	dis_node
BBS4	dis_node
BCAT1	dis_node
BCL2	dis_node
BCL2L12	dis_node
BDH1	dis_node
BGN	dis_node
BIN1	dis_node
BLM	dis_node
BMP7	dis_node			gnrh
BMPR2	dis_node			gnrh
BPTF	dis_node
BRCC3	dis_node
BSCL2	dis_node
BTRC	dis_node
C10orf35	dis_node
C14orf147	dis_node
C19orf33	dis_node
C1GALT1C1	dis_node
C1orf135	dis_node
C20orf11	dis_node
C3orf15	dis_node
C3orf64	dis_node
C4orf34	dis_node
C5orf62	dis_node
C7orf36	dis_node
C9orf91	dis_node
CACNG2	dis_node
CADPS2	dis_node
CAMK1D	dis_node
CAMK2N1	dis_node
CAPN12	dis_node
CAPN5	dis_node
CAPN6	dis_node
CBX2	dis_node
CCDC130	dis_node
CCDC58	dis_node
CCDC85B	dis_node
CCNY	dis_node
CCT6P1	dis_node
CCT8	dis_node
CD44	dis_node
CDC25B	dis_node
CDC2L6	dis_node
CDC42EP4	dis_node
CDCA3	dis_node
CDCA8	dis_node
CDK5R1	dis_node
CDKN1A	dis_node
CDKN2D	dis_node
CEBPD	dis_node
CEL	dis_node
CELSR2	dis_node
CENPB	dis_node
CENPH	dis_node
CHAF1B	dis_node
CHSY1	dis_node
CLDN1	dis_node
CLDN5	dis_node
CMTM3	dis_node
COL11A1	dis_node	integrin
COL13A1	dis_node	integrin
COL18A1	dis_node	integrin
COL4A6	dis_node	integrin
COL6A1	dis_node	integrin
COL9A1	dis_node	integrin
COQ10B	dis_node
CORO2A	dis_node
CORO2B	dis_node
CPE	dis_node
CPEB4	dis_node
CPNE3	dis_node
CRTAP	dis_node
CTNND2	dis_node
CXXC5	dis_node
CXorf26	dis_node
CYP51A1	dis_node
DACH2	dis_node
DGKQ	dis_node
DHCR24	dis_node
DHDDS	dis_node
DHRS3	dis_node
DHX33	dis_node
DIP2B	dis_node
DKK3	dis_node
DLEU1	dis_node
DLX5	dis_node
DNAJB9	dis_node
DNAL4	dis_node
DPF1	dis_node
DPP6	dis_node
DUSP3	dis_node
EBP	dis_node
EDC4	dis_node
EDN3	dis_node
EFS	dis_node	integrin
EGFR	dis_node			gnrh		egf
EGLN3	dis_node
EHMT2	dis_node
EIF1	dis_node
EIF2A	dis_node			gnrh
EIF5	dis_node
ELAVL1	dis_node
ELAVL2	dis_node
ELAVL4	dis_node
ELF4	dis_node
ELK4	dis_node
ELOVL4	dis_node
ENC1	dis_node
EPHB3	dis_node				angio
EPHB4	dis_node
ERRFI1	dis_node
ESPL1	dis_node
ETV6	dis_node
EVL	dis_node
EXOSC2	dis_node
EXOSC4	dis_node
EXOSC8	dis_node
F2R	dis_node
F3	dis_node				angio
FABP7	dis_node
FAM120B	dis_node
FAM129A	dis_node
FAM136A	dis_node
FAM164C	dis_node
FAM169A	dis_node
FAM64A	dis_node
FASTKD5	dis_node
FAT3	dis_node
FBXL6	dis_node
FBXO33	dis_node
FBXW2	dis_node
FDX1L	dis_node
FGD3	dis_node
FGF8	dis_node		fgf
FGFR3	dis_node		fgf
FGFRL1	dis_node
FHOD3	dis_node
FJX1	dis_node
FLRT3	dis_node
FNBP1	dis_node
FOXJ1	dis_node
FOXN3	dis_node
FREQ	dis_node
FRS3	dis_node		fgf		angio
FZD8	dis_node				angio
GAA	dis_node
GALNT12	dis_node
GCNT1	dis_node
GDI1	dis_node
GDI2	dis_node
GGCT	dis_node
GINS3	dis_node
GJA1	dis_node
GLA	dis_node
GLTP	dis_node
GPC2	dis_node
GPM6B	dis_node
GRK5	dis_node
GRP	dis_node
GSTK1	dis_node
GTF2F2	dis_node
GTF2IRD1	dis_node
HCFC1R1	dis_node
HDAC6	dis_node
HDC	dis_node
HERC3	dis_node
HES5	dis_node
HEY1	dis_node
HEY2	dis_node
HIST1H2AC	dis_node
HIST1H2BD	dis_node
HIST1H4C	dis_node
HIST2H2AA3	dis_node
HIST2H2BE	dis_node
HIST3H2A	dis_node
HJURP	dis_node
HNRNPC	dis_node
HNRNPU	dis_node
HOMER1	dis_node
HOPX	dis_node
HPCAL1	dis_node
HPS6	dis_node
HS6ST2	dis_node
HSD11B2	dis_node
HSPA12A	dis_node
HSPA5	dis_node			gnrh
HSPA8	dis_node			gnrh
HTATIP2	dis_node
IGDCC3	dis_node
IGFBP2	dis_node
IKBKG	dis_node
IL11RA	dis_node
IL17RD	dis_node
IMMP2L	dis_node
INHBE	dis_node
IPO4	dis_node
ISL1	dis_node			gnrh
ISOC2	dis_node
ITGB3BP	dis_node
ITLN2	dis_node
KCNA5	dis_node
KCNF1	dis_node
KCNG1	dis_node
KCNG3	dis_node
KCNIP1	dis_node
KCNIP4	dis_node
KCNK1	dis_node
KCNMB1	dis_node
KCNS3	dis_node
KIAA0101	dis_node
KIAA1199	dis_node
KIAA1217	dis_node
KIAA1737	dis_node
KIF21B	dis_node
KITLG	dis_node
KLHL24	dis_node
KLHL7	dis_node
LAD1	dis_node
LAMB2	dis_node	integrin
LCLAT1	dis_node
LDB2	dis_node
LDLRAD3	dis_node
LEPR	dis_node
LHX2	dis_node			gnrh
LHX4	dis_node
LIMCH1	dis_node
LIMS2	dis_node	integrin
LIN7A	dis_node
LPAR4	dis_node
LRCH2	dis_node
LRRC8D	dis_node
LSR	dis_node
LTBP1	dis_node
MAF	dis_node
MAGI3	dis_node
MAOA	dis_node
MAP2K6	dis_node			gnrh		egf
MAP3K7IP1	dis_node
MAPRE3	dis_node
MAPT	dis_node
MBIP	dis_node
MEF2D	dis_node
METTL14	dis_node
MFNG	dis_node
MIPEP	dis_node
MMP7	dis_node
MND1	dis_node
MNT	dis_node
MPDZ	dis_node
MPG	dis_node
MPV17	dis_node
MRAP2	dis_node
MRPL18	dis_node
MRPL49	dis_node
MRPL50	dis_node
MRPS15	dis_node
MRPS16	dis_node
MSI2	dis_node
MSLN	dis_node
MTMR12	dis_node
MXD1	dis_node
MXRA7	dis_node
NADK	dis_node
NADSYN1	dis_node
NCAM1	dis_node
NCAPG	dis_node
NDFIP2	dis_node
NDRG1	dis_node
NDUFB6	dis_node
NECAB1	dis_node
NEK6	dis_node
NELL2	dis_node
NEUROD1	dis_node
NFE2L3	dis_node
NHLH1	dis_node
NIN	dis_node
NKX2-1	dis_node
NKX2-2	dis_node
NOTCH4	dis_node				angio
NPFFR2	dis_node
NPTX2	dis_node
NR1H3	dis_node
NRIP3	dis_node
NRXN2	dis_node
NT5DC3	dis_node
NTAN1	dis_node
NUDT16L1	dis_node
NUDT9	dis_node
OLIG2	dis_node
OPCML	dis_node
OSBPL6	dis_node
OXR1	dis_node
PANK1	dis_node
PARP11	dis_node
PARP6	dis_node
PCGF2	dis_node
PDCD6	dis_node
PGM1	dis_node
PHLDB2	dis_node					egf
PIGW	dis_node
PIK3R2	dis_node	integrin			angio
PITX1	dis_node			gnrh
PKP2	dis_node
PLA2G3	dis_node
PLA2G4C	dis_node			gnrh	angio
PLEKHA7	dis_node
PLEKHG1	dis_node
PLTP	dis_node
PLXNA3	dis_node
PMP22	dis_node
PNKP	dis_node
POLA1	dis_node
POLE	dis_node
POLR3B	dis_node
POP5	dis_node
PPHLN1	dis_node
PPIC	dis_node
PPIG	dis_node
PPP1R16B	dis_node
PPPDE1	dis_node
PRMT3	dis_node
PROK2	dis_node
PROX1	dis_node
PSD2	dis_node
PSMB1	dis_node
PSME1	dis_node
PTPN9	dis_node
PTPRF	dis_node
RAB26	dis_node
RAB2B	dis_node
RAB40B	dis_node
RAB6B	dis_node
RACGAP1	dis_node
RALB	dis_node
RALGDS	dis_node
RALGPS2	dis_node
RASL12	dis_node
RASSF2	dis_node
RCAN1	dis_node
REV1	dis_node
REXO1	dis_node
RFC5	dis_node
RGS2	dis_node
RGS20	dis_node
RGS4	dis_node
RHOBTB3	dis_node
RHOC	dis_node	integrin			angio
RIC8B	dis_node
RIOK1	dis_node
RP9	dis_node
RPS6KC1	dis_node
RPUSD2	dis_node
RRAS	dis_node	integrin				egf
RTN1	dis_node
RYR3	dis_node
SALL1	dis_node
SALL2	dis_node
SARS2	dis_node
SASS6	dis_node
SCAPER	dis_node
SCARB2	dis_node
SCG2	dis_node			gnrh
SCHIP1	dis_node
SDHAF2	dis_node
SELI	dis_node
SEMA5A	dis_node
SENP6	dis_node
SEPHS2	dis_node
SERBP1	dis_node
SERINC1	dis_node
SESN2	dis_node
SETDB1	dis_node
SF3B2	dis_node
SFMBT1	dis_node
SFPQ	dis_node
SFRS1	dis_node
SFRS3	dis_node
SGPP2	dis_node
SH2D5	dis_node
SH3PXD2A	dis_node
SH3RF1	dis_node
SHANK3	dis_node
SHMT1	dis_node
SIX3	dis_node
SLC11A2	dis_node
SLC25A23	dis_node
SLC25A29	dis_node
SLC32A1	dis_node
SLC7A3	dis_node
SMPDL3A	dis_node
SNRNP200	dis_node
SNTB1	dis_node
SOSTDC1	dis_node
SOX5	dis_node
SPARCL1	dis_node
SPG20	dis_node
SPOCK2	dis_node
STK40	dis_node
STMN2	dis_node
STX12	dis_node
STXBP6	dis_node
SULT1A1	dis_node
SUPT3H	dis_node
SVIL	dis_node
TAPT1	dis_node
TATDN2	dis_node
TC2N	dis_node
TCF25	dis_node
TCF7L2	dis_node				angio
TEAD4	dis_node
TERF2IP	dis_node
TEX2	dis_node
TGFBI	dis_node
THOP1	dis_node
TLE1	dis_node
TLE4	dis_node
TMEFF2	dis_node
TMEM1	dis_node
TMEM14B	dis_node
TMEM165	dis_node
TNNC1	dis_node
TOP2A	dis_node
TP53INP1	dis_node
TPD52L1	dis_node
TRAIP	dis_node
TRAK2	dis_node
TRIB2	dis_node
TRIB3	dis_node
TRIP10	dis_node
TRPM1	dis_node
TRPT1	dis_node
TSPAN13	dis_node
TSPYL4	dis_node
TTC1	dis_node
TTC14	dis_node
TUBB3	dis_node
TXNDC9	dis_node
TYRO3	dis_node
UBE2D2	dis_node
UBE2J2	dis_node
UBE2N	dis_node
UBE2Q1	dis_node
UBL3	dis_node
UBXN1	dis_node
UNC5B	dis_node
UROD	dis_node
UTP14A	dis_node
UTP18	dis_node
VAPA	dis_node
VAT1L	dis_node
VEGFB	dis_node
VRK1	dis_node
WARS	dis_node
WBSCR27	dis_node
WDR5	dis_node
WDR60	dis_node
WDR75	dis_node
WFS1	dis_node
XKR6	dis_node
YIPF5	dis_node
ZBTB44	dis_node
ZMPSTE24	dis_node
ZNF124	dis_node
ZNF146	dis_node
ZNF514	dis_node
ZNF706	dis_node
ZWINT	dis_node
AARS	both_node
AASS	both_node
ABCA1	both_node
ABCB6	both_node
ABCC4	both_node
ABCE1	both_node
ABCF1	both_node
ABHD11	both_node
ABHD14A	both_node
ABLIM1	both_node
ACADM	both_node
ACAP1	both_node
ACAT1	both_node
ACAT2	both_node
ACCN2	both_node
ACHE	both_node
ACLY	both_node
ACO1	both_node
ACOT7	both_node
ACSL3	both_node
ACTA1	both_node
ACTB	both_node	integrin
ACTC1	both_node
ACTG2	both_node
ACTN1	both_node	integrin
ACTN3	both_node
ACTR10	both_node
ACVR1	both_node
ACVR1B	both_node			gnrh
ACVR2A	both_node			gnrh
ACY1	both_node
ADAM23	both_node
ADAMTS1	both_node
ADAR	both_node
ADI1	both_node
ADIPOR1	both_node			gnrh
ADM	both_node
ADORA2B	both_node
ADRA2A	both_node
ADRM1	both_node
ADSL	both_node
AES	both_node
AFG3L2	both_node
AFP	both_node
AGTRAP	both_node
AHSA1	both_node
AIFM1	both_node
AIG1	both_node
AIMP2	both_node
AK2	both_node
AKAP1	both_node
AKAP12	both_node
AKIRIN1	both_node
AKR1B1	both_node
AKT1	both_node		fgf	gnrh	angio	egf
ALAS1	both_node
ALCAM	both_node
ALDOC	both_node
ALG3	both_node
ALG8	both_node
ALPL	both_node
AMD1	both_node
AMMECR1	both_node
AMOT	both_node
ANAPC1	both_node
ANKMY2	both_node
ANKRD6	both_node
ANXA1	both_node
ANXA2	both_node
ANXA3	both_node
ANXA5	both_node			gnrh
AP1G2	both_node
AP1M2	both_node
AP2M1	both_node
AP2S1	both_node
AP3D1	both_node
APBB3	both_node
APEX1	both_node
APEX2	both_node
APIP	both_node
APITD1	both_node
APLP1	both_node
APOA1BP	both_node
APOBEC3B	both_node
APP	both_node
APRT	both_node
AQR	both_node
ARAP3	both_node
ARF4	both_node	integrin
ARFGEF1	both_node
ARFGEF2	both_node
ARHGAP1	both_node				angio
ARHGAP22	both_node
ARHGAP23	both_node
ARHGAP8	both_node				angio
ARHGDIA	both_node
ARHGDIB	both_node
ARHGEF1	both_node
ARHGEF5	both_node
ARIH2	both_node
ARL3	both_node
ARL4A	both_node
ARL6IP5	both_node
ARMCX2	both_node
ARMCX3	both_node
ARNTL	both_node
ARPC1B	both_node	integrin
ARPC2	both_node	integrin
ARPC4	both_node
ARPC5	both_node	integrin
ARPC5L	both_node	integrin
ARRB1	both_node
ARRDC2	both_node
ARRDC3	both_node
ARSB	both_node
ASCC3	both_node
ASF1A	both_node
ASGR1	both_node
ASNS	both_node
ASS1	both_node
ATAD3A	both_node
ATF3	both_node			gnrh
ATF4	both_node
ATF5	both_node
ATF6	both_node
ATG16L1	both_node
ATG3	both_node
ATG4C	both_node
ATIC	both_node
ATP1B1	both_node
ATP1B3	both_node
ATP2A2	both_node
ATP2A3	both_node
ATP2C1	both_node
ATP5D	both_node
ATP5G1	both_node
ATP5H	both_node
ATP5J2	both_node
ATP6AP1	both_node
ATP6V0C	both_node
ATP6V0D1	both_node
ATP6V1B1	both_node
ATP6V1G2	both_node
ATP9A	both_node
AURKA	both_node
AURKAIP1	both_node
AURKB	both_node
AVEN	both_node
AXIN2	both_node				angio
AZIN1	both_node
B3GNT2	both_node
BAD	both_node				angio
BAG5	both_node
BAMBI	both_node
BANF1	both_node
BARHL1	both_node
BAT2	both_node
BAX	both_node
BAZ1A	both_node
BAZ2B	both_node
BBS1	both_node
BCAR1	both_node	integrin
BCAR3	both_node
BCCIP	both_node
BCL11A	both_node
BCL2L1	both_node
BCL6	both_node
BCLAF1	both_node
BEND3	both_node
BEND5	both_node
BEND7	both_node
BEX2	both_node
BHLHB2	both_node
BID	both_node
BIRC5	both_node				angio
BLVRA	both_node
BMP2K	both_node
BMP6	both_node			gnrh
BMPR1A	both_node			gnrh
BNC1	both_node
BNIP3L	both_node
BNIPL	both_node
BOK	both_node
BOLA2	both_node
BOP1	both_node
BRCA1	both_node
BRIX1	both_node
BRMS1	both_node
BSN	both_node
BSPRY	both_node
BUB1	both_node
BUB1B	both_node
BUB3	both_node
C10orf2	both_node
C11orf51	both_node
C11orf73	both_node
C11orf84	both_node
C14orf166	both_node
C14orf169	both_node
C16orf48	both_node
C18orf56	both_node
C1GALT1	both_node
C1QBP	both_node
C1S	both_node
C1orf144	both_node
C1orf168	both_node
C1orf94	both_node
C20orf24	both_node
C2orf47	both_node
C3orf75	both_node
C5orf13	both_node
C6orf106	both_node
C6orf211	both_node
C7orf11	both_node
C7orf20	both_node
C7orf25	both_node
C7orf50	both_node
C9orf114	both_node
C9orf9	both_node
CA2	both_node
CABYR	both_node
CACNB3	both_node
CACYBP	both_node
CADM1	both_node
CALB2	both_node
CALCA	both_node
CALD1	both_node
CALR	both_node
CAMK2D	both_node
CAMKV	both_node
CAPZB	both_node
CARD11	both_node
CARS	both_node
CASP3	both_node
CASP6	both_node
CASP9	both_node				angio
CAV1	both_node	integrin		gnrh
CAV2	both_node
CBFB	both_node
CBR1	both_node
CBS	both_node
CBX3	both_node
CCBL2	both_node
CCDC59	both_node
CCDC6	both_node
CCDC90B	both_node
CCDC99	both_node
CCL2	both_node
CCL26	both_node
CCNA2	both_node
CCNB1	both_node
CCNC	both_node
CCND2	both_node
CCNE1	both_node
CCNG2	both_node
CCT3	both_node
CCT6A	both_node
CCT7	both_node
CD247	both_node
CD2AP	both_node
CD36	both_node
CD47	both_node
CD74	both_node
CD79B	both_node
CD83	both_node
CD9	both_node
CDA	both_node
CDC123	both_node
CDC16	both_node
CDC20	both_node
CDC25A	both_node
CDC25C	both_node
CDC26	both_node
CDC42BPA	both_node
CDC45L	both_node
CDCA4	both_node
CDCA5	both_node
CDCA7	both_node
CDCA7L	both_node
CDH1	both_node
CDH2	both_node
CDK2AP1	both_node
CDK5RAP3	both_node
CDK7	both_node
CDKN1C	both_node
CDKN3	both_node
CDO1	both_node
CDS1	both_node
CDT1	both_node
CDYL	both_node
CEACAM1	both_node
CEBPZ	both_node
CECR5	both_node
CENPA	both_node
CENPK	both_node
CENPM	both_node
CENPN	both_node
CENTA1	both_node
CEP55	both_node
CER1	both_node
CGN	both_node
CHAF1A	both_node
CHCHD3	both_node
CHEK1	both_node
CHEK2	both_node
CHGA	both_node
CHGB	both_node
CHIC2	both_node
CHN2	both_node
CHPF	both_node
CHRNA9	both_node
CHST13	both_node
CHST15	both_node
CHST3	both_node
CIB1	both_node
CINP	both_node
CIRH1A	both_node
CISD1	both_node
CITED2	both_node
CKB	both_node
CKS1B	both_node
CLDN3	both_node
CLDN7	both_node
CLEC11A	both_node
CLIP3	both_node
CLN8	both_node
CMPK1	both_node
CNDP2	both_node
CNN1	both_node
COASY	both_node
COBL	both_node
COCH	both_node
COL1A1	both_node	integrin
COL2A1	both_node	integrin
COL4A5	both_node	integrin
COL5A2	both_node	integrin
COL6A3	both_node	integrin
COL9A3	both_node	integrin
COMMD3	both_node
COMT	both_node
COPB2	both_node
COPS5	both_node
COPS6	both_node
COQ3	both_node
CPNE1	both_node
CPNE4	both_node
CPT1A	both_node
CREB5	both_node
CRELD1	both_node
CRELD2	both_node
CRIP2	both_node
CRLF3	both_node
CRLS1	both_node
CSAD	both_node
CSDA	both_node			gnrh
CSE1L	both_node
CSNK2A1	both_node
CSRP1	both_node
CST3	both_node
CSTF2	both_node
CTDSP1	both_node
CTDSPL	both_node
CTGF	both_node
CTH	both_node
CTNNAL1	both_node
CTPS	both_node
CTSA	both_node
CTSB	both_node
CTSC	both_node
CTSK	both_node
CTTN	both_node
CUEDC2	both_node
CXCL1	both_node
CXCL12	both_node
CXCL5	both_node
CXCL6	both_node
CXCR4	both_node
CXorf57	both_node
CYB5A	both_node
CYB5R2	both_node
CYC1	both_node
CYP2S1	both_node
CYR61	both_node
DACH1	both_node
DACT1	both_node
DAPK1	both_node
DARS2	both_node
DAZAP1	both_node
DAZAP2	both_node
DAZL	both_node
DBC1	both_node
DBI	both_node
DBT	both_node
DCLK1	both_node
DCPS	both_node
DCTN1	both_node
DCTN3	both_node
DCUN1D1	both_node
DCX	both_node
DDHD2	both_node
DDX1	both_node
DDX18	both_node
DDX21	both_node
DDX27	both_node
DDX39	both_node
DDX46	both_node
DDX54	both_node
DEDD	both_node
DEK	both_node
DEPDC1	both_node
DEPDC1B	both_node
DGCR8	both_node
DGUOK	both_node
DHCR7	both_node
DHX15	both_node
DHX29	both_node
DHX37	both_node
DHX58	both_node
DIABLO	both_node
DIAPH1	both_node
DIAPH3	both_node
DIDO1	both_node
DIO2	both_node
DIS3L	both_node
DKC1	both_node
DLGAP5	both_node
DLK1	both_node				angio
DLL1	both_node				angio
DMAP1	both_node
DNAJB2	both_node
DNAJB6	both_node
DNAJC7	both_node
DNAJC9	both_node
DNALI1	both_node
DNM1L	both_node
DNMT3A	both_node
DNMT3B	both_node
DOCK2	both_node
DPH2	both_node
DPH3	both_node
DPP3	both_node
DPP9	both_node
DPPA2	both_node
DPPA4	both_node
DPY30	both_node
DPYSL3	both_node
DPYSL4	both_node
DSCC1	both_node
DSN1	both_node
DSTN	both_node
DTL	both_node
DTNA	both_node	integrin
DUSP1	both_node			gnrh
DUSP16	both_node
DUSP23	both_node
DUSP5	both_node
DUSP6	both_node
DUT	both_node
DYNLL1	both_node
DYNLT1	both_node
E2F7	both_node
EBI3	both_node
EBNA1BP2	both_node
ECD	both_node
ECSCR	both_node
EDN1	both_node
EDNRB	both_node
EEF1A1	both_node
EEF1E1	both_node
EEF2K	both_node
EFEMP1	both_node
EFEMP2	both_node
EFHD1	both_node
EFNA1	both_node
EFNB1	both_node				angio
EFNB3	both_node
EFTUD2	both_node
EHD4	both_node
EIF1AX	both_node
EIF2AK2	both_node
EIF2B4	both_node
EIF2C3	both_node
EIF2S2	both_node
EIF3B	both_node
EIF3G	both_node
EIF4A3	both_node
EIF4E	both_node
EIF4E3	both_node
EIF4EBP1	both_node
EIF4EBP2	both_node
EIF4G1	both_node
EIF5A	both_node
EIF5B	both_node
EIF6	both_node
EMG1	both_node
EMX1	both_node
ENO3	both_node
ENOPH1	both_node
ENPP1	both_node
ENSA	both_node
ENY2	both_node
EPB41L2	both_node
EPB41L3	both_node
EPB41L5	both_node
EPCAM	both_node
EPHA1	both_node
EPHA4	both_node
EPHB1	both_node
EPHB2	both_node				angio
EPHX1	both_node
EPRS	both_node
ERBB2	both_node					egf
ERBB3	both_node					egf
ERCC1	both_node
ERCC6L	both_node
ETFB	both_node
ETS1	both_node				angio
ETV4	both_node
ETV5	both_node
EWSR1	both_node
EXO1	both_node
EXOC2	both_node
EXOSC1	both_node
EXOSC3	both_node
EXOSC9	both_node
EZR	both_node
F11R	both_node
FA2H	both_node
FABP3	both_node
FABP5	both_node
FADD	both_node
FAM124B	both_node
FAM46B	both_node
FAM83H	both_node
FAM86A	both_node
FAM98A	both_node
FANCD2	both_node
FANCI	both_node
FARS2	both_node
FASTK	both_node
FBLN1	both_node
FBN2	both_node
FBP1	both_node
FBXO10	both_node
FBXO28	both_node
FBXO5	both_node
FBXW5	both_node
FCHO1	both_node
FDFT1	both_node
FECH	both_node
FEN1	both_node
FERMT2	both_node
FEZ1	both_node
FGF12	both_node		fgf
FGF19	both_node
FGF2	both_node
FGFR1	both_node		fgf		angio
FGFR4	both_node		fgf
FHL2	both_node
FHOD1	both_node
FKBP3	both_node
FKBP4	both_node
FKBP5	both_node
FLAD1	both_node
FLII	both_node
FLJ10374	both_node
FOLR1	both_node
FOXA2	both_node
FOXK1	both_node
FOXM1	both_node
FOXO1	both_node
FRAP1	both_node
FRMD6	both_node
FRZB	both_node				angio
FSCN1	both_node
FTL	both_node
FUS	both_node
FXYD1	both_node
FXYD6	both_node
FXYD7	both_node
FYN	both_node	integrin
FYTTD1	both_node
FZD2	both_node				angio
FZD5	both_node				angio
FZD7	both_node
G3BP1	both_node
GABARAPL2	both_node
GABBR2	both_node
GABRA5	both_node
GABRB3	both_node
GAD1	both_node
GADD45G	both_node
GADD45GIP1	both_node
GAL	both_node
GALNT1	both_node
GALNT9	both_node
GAP43	both_node
GAR1	both_node
GARS	both_node
GART	both_node
GAS6	both_node
GAS7	both_node
GCAT	both_node
GCDH	both_node
GCLM	both_node
GCSH	both_node
GDAP1	both_node
GDF15	both_node
GEMIN4	both_node
GFPT1	both_node
GFPT2	both_node
GGH	both_node
GINS2	both_node
GINS4	both_node
GLI2	both_node
GLIPR2	both_node
GLMN	both_node
GLO1	both_node
GLRX3	both_node
GLS2	both_node
GMDS	both_node
GMNN	both_node
GNA12	both_node
GNA14	both_node
GNE	both_node
GNG2	both_node			gnrh
GNG3	both_node
GNL2	both_node
GNL3	both_node
GNL3L	both_node
GOLPH3L	both_node
GORASP2	both_node
GOT2	both_node
GPC3	both_node
GPM6A	both_node
GPR176	both_node
GPSM1	both_node
GPT2	both_node
GRB10	both_node
GRB14	both_node				angio
GRB7	both_node				angio
GRHL3	both_node
GRK4	both_node
GRM3	both_node
GRPEL2	both_node
GRPR	both_node
GRSF1	both_node
GRTP1	both_node
GRWD1	both_node
GSC	both_node
GSDMB	both_node
GSN	both_node
GSS	both_node
GSTP1	both_node
GSTT1	both_node
GTF2E1	both_node
GTF2E2	both_node
GTF3A	both_node
GTF3C1	both_node
GTF3C2	both_node
GTF3C6	both_node
GUF1	both_node
GULP1	both_node
H1F0	both_node
H2AFY	both_node
H2AFY2	both_node
HABP4	both_node
HAPLN3	both_node
HAT1	both_node
HBA2	both_node
HCLS1	both_node
HDAC3	both_node
HELLS	both_node
HERC5	both_node
HERC6	both_node
HES4	both_node
HES6	both_node
HHEX	both_node
HIF1A	both_node				angio
HIP2	both_node
HIST2H2AC	both_node
HK1	both_node
HLA-DOA	both_node
HMBS	both_node
HMGA1	both_node
HMGB3	both_node
HMGCS1	both_node
HMMR	both_node
HMOX1	both_node
HNRNPA1	both_node
HNRNPA3	both_node
HNRNPAB	both_node
HNRNPD	both_node
HNRNPL	both_node
HNRNPM	both_node
HNRPA2B1	both_node
HNRPM	both_node
HOMER2	both_node
HPRT1	both_node
HPS5	both_node
HRAS	both_node	integrin	fgf	gnrh	angio	egf
HS3ST3A1	both_node
HS3ST5	both_node
HSD17B12	both_node
HSD17B4	both_node
HSP90AA1	both_node
HSP90B1	both_node
HSPA14	both_node
HSPA2	both_node			gnrh
HSPA4	both_node
HSPA4L	both_node
HSPA9	both_node			gnrh
HSPB1	both_node				angio
HSPB8	both_node
HSPBP1	both_node
HSPD1	both_node
HSPE1	both_node
HTR3A	both_node			gnrh
IARS	both_node
ICAM2	both_node
ICAM3	both_node
ICMT	both_node
ID1	both_node
IDE	both_node
IDH1	both_node
IDI1	both_node
IER3	both_node
IER3IP1	both_node
IFI6	both_node
IFIT1	both_node
IFRD2	both_node
IGF2R	both_node
IGFBP3	both_node
IGFBP4	both_node
IGFBP5	both_node
IGFBP6	both_node
IKBKE	both_node
IL27RA	both_node
ILF2	both_node
ILK	both_node	integrin
IMP3	both_node
INA	both_node
INF2	both_node
INO80	both_node
INO80D	both_node
INPP1	both_node
INSIG1	both_node
INSM1	both_node
IPO11	both_node
IQGAP1	both_node
IQGAP2	both_node
IRF3	both_node
IRX2	both_node
ISCU	both_node
ITFG1	both_node
ITGA3	both_node	integrin
ITGA6	both_node	integrin
ITGAV	both_node	integrin
ITGB1	both_node	integrin		gnrh
ITGB1BP3	both_node
ITGB4BP	both_node
ITGB5	both_node	integrin
ITPA	both_node
ITPK1	both_node
ITPR3	both_node			gnrh
ITSN1	both_node
JAK1	both_node				angio
JAM2	both_node
JMJD1A	both_node
JTB	both_node
JUN	both_node			gnrh	angio
KAL1	both_node
KAT2B	both_node			gnrh
KATNB1	both_node
KCND2	both_node
KCNK6	both_node
KCNQ2	both_node
KDR	both_node				angio
KEAP1	both_node
KIAA0020	both_node
KIAA0196	both_node
KIAA0368	both_node
KIAA0564	both_node
KIAA0664	both_node
KIAA1033	both_node
KIAA1279	both_node
KIAA1598	both_node
KIF11	both_node
KIF1C	both_node
KIF20B	both_node
KIF23	both_node
KIFAP3	both_node
KIT	both_node
KLF4	both_node
KLHL28	both_node
KLHL5	both_node
KLKB1	both_node
KPNA2	both_node
KPTN	both_node
LAMA1	both_node	integrin
LAMB1	both_node	integrin
LAMC2	both_node	integrin
LAMC3	both_node	integrin
LAMP1	both_node
LARP1	both_node
LARP1B	both_node
LARP6	both_node
LARS	both_node
LARS2	both_node
LAS1L	both_node
LASP1	both_node
LCK	both_node	integrin
LCP1	both_node
LDHA	both_node
LDLR	both_node
LDLRAP1	both_node
LECT1	both_node
LEFTY1	both_node
LEFTY2	both_node
LEMD3	both_node
LEO1	both_node
LEPREL1	both_node
LGALS1	both_node
LGALS3BP	both_node
LIG1	both_node
LIMA1	both_node
LIMS1	both_node	integrin
LMCD1	both_node
LMNA	both_node
LMNB2	both_node
LMO1	both_node
LMO3	both_node
LMO4	both_node
LOC100130932	both_node
LONP1	both_node
LOXL4	both_node
LRIG1	both_node
LRP2	both_node
LRP8	both_node
LRRC16A	both_node
LSM1	both_node
LSM10	both_node
LSM12	both_node
LSM3	both_node
LSM6	both_node
LSS	both_node
LTBP3	both_node
LTV1	both_node
LYAR	both_node
LYN	both_node
LYPLA2	both_node
LZTS1	both_node
MAD2L1	both_node
MAD2L1BP	both_node
MAD2L2	both_node
MAEA	both_node
MAG	both_node
MAGED1	both_node
MAK16	both_node
MAL2	both_node
MAMDC2	both_node
MAP1A	both_node
MAP1LC3A	both_node
MAP1LC3C	both_node
MAP2	both_node
MAP4	both_node
MAP4K1	both_node			gnrh
MAP6	both_node
MAP7	both_node
MAPK1	both_node	integrin	fgf	gnrh	angio	egf
MAPK10	both_node	integrin	fgf	gnrh	angio	egf
MAPK13	both_node	integrin	fgf	gnrh		egf
MAPK8IP3	both_node
MAPK9	both_node	integrin	fgf	gnrh	angio	egf
MAPKAPK5	both_node
MARS	both_node
MARS2	both_node
MASTL	both_node
MAT2B	both_node
MATN2	both_node
MATR3	both_node
MCM10	both_node
MCM2	both_node
MCM3	both_node
MCM4	both_node
MCM5	both_node
MCM6	both_node
MCM7	both_node
MCRS1	both_node
MDK	both_node
MDM2	both_node
MDN1	both_node
MED14	both_node
MED20	both_node
MED4	both_node
MEGF10	both_node
MEIS2	both_node
MELK	both_node
MEST	both_node
METAP1	both_node
METTL1	both_node
METTL3	both_node
METTL7A	both_node
MEX3B	both_node
MEX3C	both_node
MGAT4B	both_node
MICALL1	both_node	integrin
MICB	both_node
MINA	both_node
MITD1	both_node
MKI67IP	both_node
MKLN1	both_node
MLF1IP	both_node
MLF2	both_node
MLH1	both_node
MME	both_node
MMGT1	both_node
MMP25	both_node
MMP9	both_node
MOAP1	both_node
MOGS	both_node
MPP1	both_node
MPP6	both_node
MPPED1	both_node
MPRIP	both_node
MPZL1	both_node
MRI1	both_node
MRPL11	both_node
MRPL12	both_node
MRPL13	both_node
MRPL15	both_node
MRPL16	both_node
MRPL17	both_node
MRPL2	both_node
MRPL20	both_node
MRPL21	both_node
MRPL23	both_node
MRPL24	both_node
MRPL27	both_node
MRPL3	both_node
MRPL32	both_node
MRPL37	both_node
MRPL38	both_node					egf
MRPL4	both_node
MRPL41	both_node
MRPL42	both_node
MRPL44	both_node
MRPL46	both_node
MRPL51	both_node
MRPL52	both_node
MRPL55	both_node
MRPS10	both_node
MRPS11	both_node
MRPS12	both_node
MRPS17	both_node
MRPS18B	both_node
MRPS26	both_node
MRPS28	both_node
MRPS30	both_node
MRPS34	both_node
MRPS35	both_node
MRPS7	both_node
MRPS9	both_node
MRTO4	both_node
MSH6	both_node
MSI1	both_node
MSN	both_node
MT1F	both_node
MT1X	both_node
MT2A	both_node
MTA3	both_node
MTAP	both_node
MTFMT	both_node
MTG1	both_node
MTHFD1	both_node
MTHFD1L	both_node
MTHFD2	both_node
MTIF2	both_node
MTO1	both_node
MTRF1L	both_node
MTSS1	both_node
MTX1	both_node
MUC4	both_node
MVD	both_node
MX1	both_node
MXD4	both_node
MYB	both_node
MYBL2	both_node
MYC	both_node
MYL6	both_node
MYL9	both_node
MYO1D	both_node
MYOZ3	both_node
NAALAD2	both_node
NACC1	both_node
NAE1	both_node
NAGK	both_node
NANOG	both_node
NANS	both_node
NAP1L2	both_node
NAP1L3	both_node
NAP1L5	both_node
NARG1	both_node
NARS	both_node
NARS2	both_node
NASP	both_node
NAV1	both_node
NCALD	both_node
NCAPD3	both_node
NCAPG2	both_node
NCBP2	both_node
NCL	both_node
NDN	both_node
NDUFA8	both_node
NDUFAB1	both_node
NDUFB9	both_node
NDUFS3	both_node
NDUFV2	both_node
NEDD9	both_node
NEFL	both_node
NEFM	both_node
NEK3	both_node
NEU1	both_node
NFE2	both_node
NFIB	both_node
NFKBIB	both_node
NGLY1	both_node
NHP2	both_node
NIP7	both_node
NKD2	both_node
NLN	both_node
NLRP12	both_node
NLRP2	both_node
NMB	both_node
NME1	both_node
NME1-NME2	both_node
NME2	both_node
NME3	both_node
NODAL	both_node
NOL11	both_node
NOL7	both_node
NOLC1	both_node
NOP10	both_node
NOP16	both_node
NOP2	both_node
NOP56	both_node
NOP58	both_node
NPW	both_node
NQO1	both_node
NQO2	both_node
NR5A2	both_node			gnrh
NRAS	both_node	integrin	fgf	gnrh	angio	egf
NRBF2	both_node
NRCAM	both_node
NRK	both_node
NRP1	both_node
NRP2	both_node
NSBP1	both_node
NSD1	both_node
NSUN2	both_node
NSUN5	both_node
NTF3	both_node
NTHL1	both_node
NTM	both_node
NTRK2	both_node
NTS	both_node
NUAK1	both_node
NUDC	both_node
NUDT1	both_node
NUDT15	both_node
NUDT5	both_node
NUDT6	both_node
NUP107	both_node
NUP205	both_node
NUP35	both_node
NUP37	both_node
NUP50	both_node
NUP62	both_node
NUP85	both_node
NUP88	both_node
NUSAP1	both_node
OAT	both_node
OBSL1	both_node
OCIAD2	both_node
ODC1	both_node
OGFOD1	both_node
OGG1	both_node
OIP5	both_node
OLFM1	both_node
OPRL1	both_node
ORC1L	both_node
ORC2L	both_node
ORC6L	both_node
ORM1	both_node
OSBP2	both_node
OSBPL10	both_node
OSTF1	both_node
OTUD6B	both_node
OTX2	both_node
P2RY1	both_node
P4HA2	both_node
PA2G4	both_node
PABPN1	both_node
PACSIN1	both_node
PACSIN3	both_node
PAICS	both_node
PAK1	both_node				angio
PAK1IP1	both_node
PALLD	both_node
PAPLN	both_node
PAPSS2	both_node
PARD6A	both_node
PARN	both_node
PARP1	both_node
PARP12	both_node
PARVA	both_node	integrin
PAXIP1	both_node
PCBD1	both_node
PCBP4	both_node
PCGF6	both_node
PCNA	both_node
PCOLCE	both_node
PCSK9	both_node
PCYT2	both_node
PDCD5	both_node
PDCL3	both_node
PDE4B	both_node
PDE6D	both_node
PDGFB	both_node				angio
PDGFC	both_node				angio
PDGFRB	both_node				angio
PDLIM1	both_node
PDLIM3	both_node
PDLIM5	both_node
PDLIM7	both_node
PDPN	both_node
PEA15	both_node			gnrh
PEG10	both_node
PELO	both_node
PELP1	both_node
PEPD	both_node
PFAS	both_node
PFDN5	both_node
PFKP	both_node
PFN1	both_node
PGAM1	both_node
PGAM4	both_node
PGAM5	both_node
PGRMC1	both_node
PHAX	both_node
PHB	both_node
PHC1	both_node
PHC2	both_node
PHF10	both_node
PHF14	both_node
PHF17	both_node
PHF19	both_node
PHF5A	both_node
PHGDH	both_node
PHLDA1	both_node
PHLDA3	both_node
PHLPP1	both_node
PIAS2	both_node
PICK1	both_node
PIF1	both_node
PIK3C2A	both_node	integrin	fgf		angio	egf
PIK3CD	both_node	integrin	fgf		angio	egf
PIK3R1	both_node	integrin		gnrh	angio
PIM2	both_node
PINX1	both_node
PIP4K2A	both_node
PITPNB	both_node
PKIA	both_node
PKM2	both_node
PKMYT1	both_node
PKN3	both_node
PLAGL1	both_node
PLAU	both_node
PLAUR	both_node
PLCD1	both_node
PLD3	both_node
PLEKHB1	both_node
PLEKHO1	both_node
PLK4	both_node
PLOD2	both_node
PLP1	both_node
PLS1	both_node
PLS3	both_node
PMAIP1	both_node
PMM2	both_node
PNMA2	both_node
POLA2	both_node
POLE2	both_node
POLR2F	both_node
POLR2H	both_node
POLR2I	both_node
POLR2J	both_node
POLR2L	both_node
POLR3E	both_node
POLR3G	both_node
POLR3K	both_node
POMP	both_node
PON2	both_node
POP1	both_node
POP7	both_node
POR	both_node
POTEF	both_node
POU5F1	both_node
PPAN	both_node
PPAP2A	both_node
PPAP2B	both_node
PPAP2C	both_node
PPAT	both_node
PPFIA1	both_node
PPFIBP2	both_node
PPIH	both_node
PPIL1	both_node
PPL	both_node
PPM1B	both_node
PPM1F	both_node
PPM1G	both_node
PPP1R1B	both_node
PPP2CA	both_node		fgf			egf
PPP2R1B	both_node		fgf
PPP2R2B	both_node		fgf
PPP2R5A	both_node		fgf			egf
PPP4C	both_node		fgf			egf
PQBP1	both_node
PQLC1	both_node
PRCP	both_node
PRDM5	both_node
PRDX1	both_node
PRDX4	both_node
PRELID1	both_node
PRIM1	both_node
PRKAR1A	both_node			gnrh
PRKCDBP	both_node
PRKCQ	both_node		fgf	gnrh	angio	egf
PRKDC	both_node
PRMT6	both_node
PRNP	both_node
PROCR	both_node
PROS1	both_node
PRPF38A	both_node
PRPS2	both_node
PRSS23	both_node
PRTFDC1	both_node
PSAT1	both_node
PSD3	both_node
PSIP1	both_node
PSMA1	both_node
PSMA2	both_node
PSMA3	both_node
PSMA4	both_node
PSMA5	both_node
PSMB10	both_node
PSMB3	both_node
PSMB5	both_node
PSMB8	both_node
PSMB9	both_node
PSMC2	both_node
PSMC4	both_node
PSMC5	both_node
PSMD12	both_node
PSMD4	both_node
PSME3	both_node
PSME4	both_node
PSMG1	both_node
PSPC1	both_node
PSPH	both_node
PSRC1	both_node
PTCH1	both_node
PTGES2	both_node
PTGFRN	both_node
PTP4A1	both_node
PTPLA	both_node
PTPN6	both_node		fgf		angio
PTPRG	both_node
PTTG1	both_node
PUS1	both_node
PUS7	both_node
PVRL1	both_node
PWP1	both_node
PYCARD	both_node
PYGL	both_node
PYGM	both_node
RAB17	both_node
RAB22A	both_node
RAB2A	both_node
RAB31	both_node
RAB32	both_node
RAB34	both_node
RAB3C	both_node
RAB5A	both_node
RAB5C	both_node
RAB9A	both_node
RABGAP1L	both_node
RABGGTB	both_node
RAD51AP1	both_node
RAD54L	both_node
RAGE	both_node
RAI1	both_node
RAI14	both_node
RALGAPA1	both_node
RAN	both_node
RANBP1	both_node
RANGAP1	both_node
RAPGEF1	both_node	integrin
RARA	both_node
RARRES2	both_node
RARRES3	both_node
RASIP1	both_node
RASSF3	both_node
RBBP8	both_node
RBM12	both_node
RBM3	both_node
RBM4	both_node
RBM42	both_node
RBPJ	both_node				angio
RBPMS	both_node
RBPMS2	both_node
RCC2	both_node
RCN3	both_node
RECQL	both_node
REXO2	both_node
RFC2	both_node
RFC3	both_node
RFC4	both_node
RFWD3	both_node
RFXAP	both_node
RGL1	both_node
RGMB	both_node
RGS16	both_node
RGS17	both_node
RGS5	both_node
RGS7	both_node
RHBDL3	both_node
RHEB	both_node
RHOQ	both_node					egf
RHOU	both_node
RIF1	both_node
RIN2	both_node
RIPK1	both_node
RIT2	both_node	integrin	fgf		angio	egf
RNASEH2A	both_node
RNASEH2B	both_node
RND3	both_node	integrin
RNF10	both_node
RNF114	both_node
RNF125	both_node
RNF126	both_node
RNF138	both_node
RNF14	both_node
RNF144B	both_node
RNMTL1	both_node
RNPS1	both_node
ROR1	both_node
ROR2	both_node
RORA	both_node
RPA3	both_node
RPF2	both_node
RPL13	both_node
RPL29	both_node
RPL34	both_node
RPL36A	both_node
RPL37	both_node
RPL6	both_node
RPL8	both_node
RPP40	both_node
RPS15	both_node
RPS21	both_node
RPS23	both_node
RPS24	both_node
RPS26	both_node
RPS26P11	both_node
RPS6KA1	both_node
RPS6KA2	both_node
RPS7	both_node
RRAGA	both_node
RRAS2	both_node					egf
RRBP1	both_node
RRM1	both_node
RRM2B	both_node
RRP12	both_node
RRP15	both_node
RRS1	both_node
RSU1	both_node
RTCD1	both_node
RUNX1T1	both_node
RUVBL1	both_node
RUVBL2	both_node
S100A10	both_node
S100A4	both_node
S100A6	both_node
S1PR3	both_node
SAC3D1	both_node			gnrh
SAE1	both_node
SAFB2	both_node
SALL3	both_node
SALL4	both_node
SAPS1	both_node
SAR1B	both_node
SASH1	both_node
SC4MOL	both_node
SCD	both_node
SCG3	both_node
SCNM1	both_node
SCNN1A	both_node
SCNN1G	both_node
SCO1	both_node
SCPEP1	both_node
SDAD1	both_node
SDCCAG3	both_node
SDF2L1	both_node
SDHA	both_node
SEC11C	both_node
SEH1L	both_node
SEL1L3	both_node
SEMA5B	both_node
SEMA6A	both_node
SEMG1	both_node
SEPHS1	both_node
2013-09-03	both_node
SERF2	both_node
SERPINB4	both_node
SERPINB9	both_node
SERPINE1	both_node
SERPINE2	both_node
SERPINF1	both_node
SERTAD2	both_node
SESN1	both_node
SET	both_node
SETD3	both_node
SF3A3	both_node
SF3B4	both_node
SFRP1	both_node				angio
SFRP2	both_node
SFRS10	both_node
SFRS13A	both_node
SFRS2	both_node
SFXN2	both_node
SFXN5	both_node
SGK	both_node
SGK1	both_node
SGK3	both_node
SGOL1	both_node
SGOL2	both_node
SH2B3	both_node
SH3D19	both_node
SH3GL3	both_node
SH3GLB1	both_node
SH3KBP1	both_node
SHC1	both_node	integrin	fgf		angio	egf
SHFM1	both_node
SHMT2	both_node
SIGMAR1	both_node
SIL1	both_node
SIP1	both_node
SIRT1	both_node
SIRT5	both_node
SIVA	both_node
SIVA1	both_node
SIX6	both_node
SKIL	both_node			gnrh
SKP1	both_node
SLC10A7	both_node
SLC25A19	both_node
SLC25A26	both_node
SLC25A4	both_node
SLC30A5	both_node
SLC39A14	both_node
SLC39A6	both_node
SLC3A2	both_node
SLC43A3	both_node
SLC4A11	both_node
SLC7A1	both_node
SLC7A5	both_node
SLC9A3R1	both_node
SLIT2	both_node
SLTM	both_node
SMAD3	both_node			gnrh
SMAD7	both_node
SMAP2	both_node
SMARCA2	both_node
SMARCD3	both_node
SMC2	both_node
SMC4	both_node
SMC6	both_node
SMG5	both_node
SMPDL3B	both_node
SMS	both_node
SNAP23	both_node
SNAP25	both_node
SNAP91	both_node
SNRNP40	both_node
SNRPA	both_node
SNRPA1	both_node
SNRPB	both_node
SNRPB2	both_node
SNRPC	both_node
[truncated: 2,701 more rows]
